# Supplementary material for: Copper-catalyzed olefinic trifluoromethylation of enamides at room temperature
Source: Royal Society of Chemistry journal article supplement (doi:10.1039/c2sc21164e), 2012-01-01
Supplement: c2sc21164e.pdf [file c2sc21164e.pdf]

# Copper-Catalyzed Olefinic C-H Trifluoromethylation of Enamides at Room Temperature

Chao Feng and Teck-Peng Loh\*

*Division of Chemistry and Biological Chemistry, School of Physical and Mathematical Sciences,  
Nanyang Technological University, Singapore 637371*

[teckpeng@ntu.edu.sg](mailto:teckpeng@ntu.edu.sg)

## Supporting Information

| Table of Contents                                              | Page No |
|----------------------------------------------------------------|---------|
| General Information                                            | S-2     |
| Experimental Section                                           | S-3     |
| Substrate Synthesis                                            | S-3     |
| Copper-catalyzed olefinic C-H trifluoromethylation of enamides | S-7     |
| Characterization of products                                   | S-8     |
| Reactivity profile of $\beta$ -substituted acyclic enamides    | S-14    |
| Control experiments                                            | S-16    |
| Copper-catalyzed oxytrifluoromethylation of enamides           | S-21    |
| Characterization of products                                   | S-21    |
| $^1\text{H}$ and $^{13}\text{C}$ NMR spectra of products       | S-25    |
| X-ray Data                                                     | S-72    |

## General information

Cu(MeCN)<sub>4</sub>PF<sub>6</sub>, CuCl, anhydrous MeOH were purchased from commercial suppliers and used as received unless otherwise noted. All reactions were carried out using standard Schlenk technic. THF was freshly distilled under sodium/benzophenone ketyl. Reactions were monitored through thin layer chromatography [Merck 60 F254 precoated silica gel plate (0.2 mm thickness)]. Subsequent to elution, spots were visualized using UV radiation (254 nm) on Spectroline Model ENF-24061/F 254 nm. Further visualization was possible using basic solution of potassium permanganate or acidic solution of ceric molybdate as stain, followed by heating on a hot plate. Flash chromatography was performed using Merck silica gel 60 with distilled solvents. HRMS spectra were recorded on a Waters Q-ToF Premier Spectrometer. <sup>1</sup>H NMR and <sup>13</sup>C NMR spectra were recorded using Bruker Avance 400 MHz spectrometers. <sup>19</sup>F spectra were recorded (external standard α,α,α-trifluorotoluene (-63.73 ppm) <sup>19</sup>F ) using Bruker Avance 300 MHz spectrometers. Chemical shifts for <sup>1</sup>H NMR spectra are reported as δ in units of parts per million (ppm) downfield from SiMe<sub>4</sub> (δ 0.0) and relative to the signal of SiMe<sub>4</sub> (δ 0.00, singlet). Multiplicities were given as: s (singlet); brs (broad singlet); d (doublet); t (triplet); q (quartet); dd (doublets of doublet); ddd (doublets of doublets of doublet); td (triplet of doublet); m (multiplets); ddt (doublet of doublet of triplet) and etc. Coupling constants are reported as a *J* value in Hz. Carbon nuclear magnetic resonance spectra (<sup>13</sup>C NMR) are reported as δ in units of parts per million (ppm) downfield from SiMe<sub>4</sub> (δ 0.0) and relative to the signal of chloroform-*d* (δ 77.00, triplet).

## Experimental section

### Substrate synthesis

2a-2d, 2g-2r were synthesized using reported method.<sup>[1]</sup>

Tognis' reagent 1 was synthesized following the reported method.<sup>[2]</sup>

### General reaction scheme

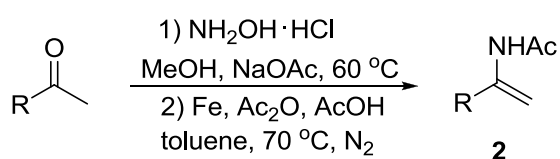

**Synthetic procedure:** a) A mixture of ketone (10 mmol),  $\text{NaOAc}$  (12 mmol) and hydroxylamine hydrochloride (12 mmol) in methanol (5mL) was stirred for 2 h at  $60\text{ }^\circ\text{C}$ . After cooling to room temperature, water was added and the mixture was extracted with ethyl acetate ( $2 \times 50\text{ mL}$ ) dried over  $\text{MgSO}_4$ . The organic solvent was evaporated to afford the ketoxime pure enough for next step. b) To an oven-dried 50 mL two-neck RBF assembled with condenser was added ketoxime. The flask was vacuumed and backfilled with  $\text{N}_2$  for three times. Anhydrous toluene (20 mL) was added followed by acetic anhydride (30 mmol), acetic acid (30 mmol) and iron powder (20 mmol). The reaction flask was put into a  $70\text{ }^\circ\text{C}$  preheated oil bath and allowed to stir for 5 hours under nitrogen atmosphere. After cooling to room temperature, ethyl acetate was added and the mixture was filtered through a short pad of celite. The solution thus obtained was evaporated to product crude enamide, which was directly purified by column chromatography.

[1] a) M. Berg, R. M. Haak, A. J. Minnaard, A. H. M. Vries, J. G. Vries, B. L. Feringa, *Adv. Synth. Catal.* 2002, **344**, 1003; b) M. J. Burk, G. Casy, N. B. Johnson, *J. Org. Chem.* 1998, **63**, 6084; c) H. Zhou, W. J. Chung, Y. H. Xu, T. P. Loh, *Chem. Commun.* 2009, 3472.

[2] K. Stanek, R. Koller, A. Togni, *J. Org. Chem.* 2008, **73**, 7678.

### Reaction scheme for **2e** synthesis

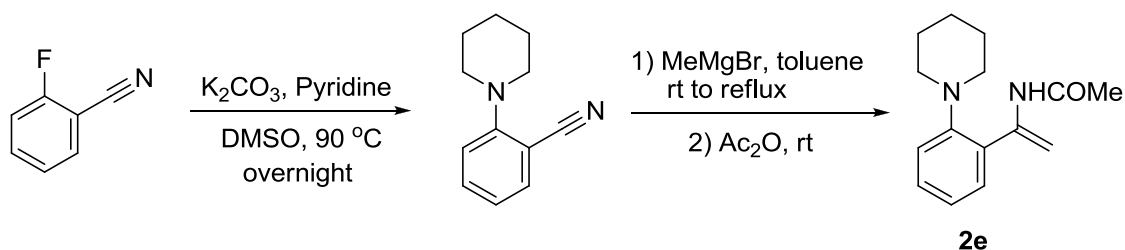

**Synthetic procedure:** a) An 50 mL RBF was charged with 2-fluorobenzonitrile (10 mmol),  $K_2CO_3$  (20 mmol), pyridine (12 mmol), and DMSO (5 mL) sequentially. The reaction flask was subjected to a  $90\text{ }^\circ\text{C}$  preheated oil bath and stirred overnight, at which time the resulting mixture was cooled down to room temperature, diluted with ethyl acetate, and washed thoroughly with water. Removal of the solvent in *vacuo* and purification of the residue by silica gel column chromatography afforded the desired product 2-(piperidin-1-yl)benzonitrile in 90% yield.

b) To an oven-dried 50 mL two-neck RBF assembled with condenser was added 2-(piperidin-1-yl)benzonitrile and dry toluene (15 mL).  $\text{MeMgBr}$  (12 mmol, 3M in ether) was added to the solution under  $N_2$  at room temperature. After stirring 10 minutes, the mixture was subjected to a  $110\text{ }^\circ\text{C}$  preheated oil bath and stirred overnight. After cooling to room temperature,  $\text{Ac}_2\text{O}$  (15 mmol) was added into the solution dropwise and the resulting mixture was stirred at room temperature for 2 hours, at which time saturated  $\text{NaHCO}_3$  solution was added followed by extraction with ethyl acetate ( $2 \times 50\text{ mL}$ ), and drying over  $\text{MgSO}_4$ . The organic solvent was evaporated and the residue was subjected to column chromatography on silica gel to deliver the product **2e** in 56% yield.

## Reaction scheme for 2f synthesis

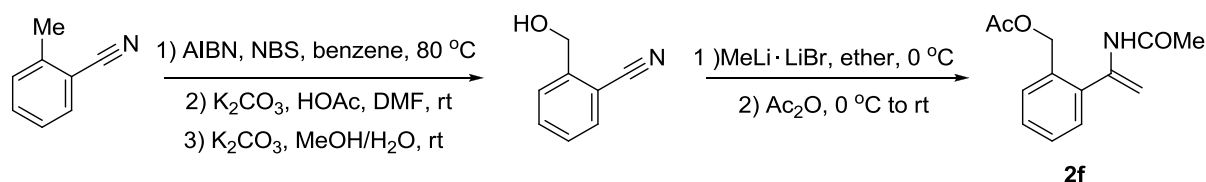

**Synthetic procedure:** a) The mixture of *o*-tolunitrile (20 mmol), NBS (21 mmol), and AIBN (1 mmol) in benzene (20 ml) was stirred at 80 °C for 1 h. After cooling to room temperature, the reaction was quenched with water and the mixture was extracted with ether followed by drying over MgSO<sub>4</sub>. The organic solvent was evaporated to give the residue which is used directly in next step without purification.

b) To a suspension of AcOH (80 mmol) and K<sub>2</sub>CO<sub>3</sub> (80 mmol) in DMF (90 mL) was added the crude 2-(bromomethyl)benzonitrile in DMF (10 mL) at room temperature, and the mixture was stirred at the same temperature for 1 hour. After quenching with water the mixture was extracted with ether followed by drying over MgSO<sub>4</sub>. The organic solvent was evaporated to give the residue which is used directly in next step without purification.

c) To a suspension of K<sub>2</sub>CO<sub>3</sub> (100 mmol) in 30 mL MeOH/H<sub>2</sub>O (2:1) was added the above obtained 2-cyanobenzyl acetate. The mixture was stirred at room temperature and the progress of reaction was monitored through TLC. Once the reaction finished, water was added and thus resulting solution was extracted with ethyl acetate. After drying over MgSO<sub>4</sub>, the organic solvent was evaporated and the residue was subjected to silica gel column chromatography to afford the desired product 2-(hydroxymethyl)benzonitrile in 75% yield.

d) To an oven-dried 50 mL two-neck RBF assembled with condenser was added 2-(hydroxymethyl)benzonitrile (5 mmol) and dry ether (10 mL). MeLi · LiBr

(7.5 mmol, 1M in ether) was slowly added into the solution under N<sub>2</sub> at 0 °C. After stirring for 2 hours at the same temperature, Ac<sub>2</sub>O (15 mmol) was added and the resulting mixture was stirred at room temperature overnight. Saturated NaHCO<sub>3</sub> solution was added followed by extraction with ethyl acetate (2×50 mL), and drying over MgSO<sub>4</sub>. The organic solvent was evaporated and the residue was subjected to column chromatography on silica gel to deliver the product **2f** in 23% yield.

### Reaction scheme for **2s** synthesis

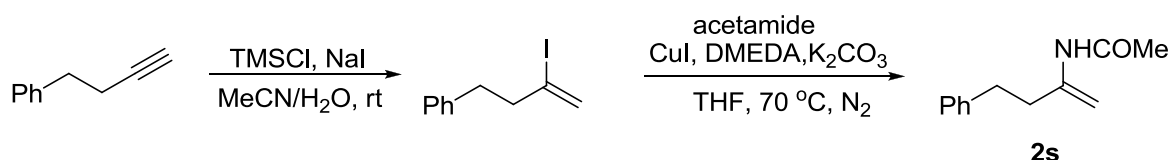

**Synthetic procedure:** a) At room temperature TMSCl (10 mmol) was added to a solution of NaI (10 mmol) in MeCN (10 mL) followed by H<sub>2</sub>O (5 mmol). After stirring for 10 minutes, but-3-ynylbenzene (6 mmol) was added and the resulting solution was stirred for 1 hour at room temperature. The reaction was quenched with H<sub>2</sub>O (20 mL) and extracted with ethyl acetate followed by drying over MgSO<sub>4</sub>. The organic solvent was evaporated to give the crude (3-iodobut-3-enyl)benzene, which is used directly in next step without further purification.

b) To an oven-dried 50 mL two-neck RBF assembled with condenser was added CuI (1.5 mmol), K<sub>2</sub>CO<sub>3</sub> (9 mmol), acetamide (12 mmol). The flask was vacuumed and backfilled with N<sub>2</sub> for three times. Anhydrous THF (5 mL) was added followed by DMEDA (3 mmol) and crude (3-iodobut-3-enyl)benzene. The reaction flask was put into a 70 °C preheated oil bath and allowed to stir overnight. After cooling to room temperature, water was added and the mixture was extracted with ethyl acetate (2×50 mL) followed by drying over MgSO<sub>4</sub>.

The organic solvent was evaporated and the residue was subjected to column chromatography on silica gel to deliver the product **2s** in 33% yield.

## Copper-catalyzed olefinic C-H trifluoromethylation of enamides

### General reaction scheme

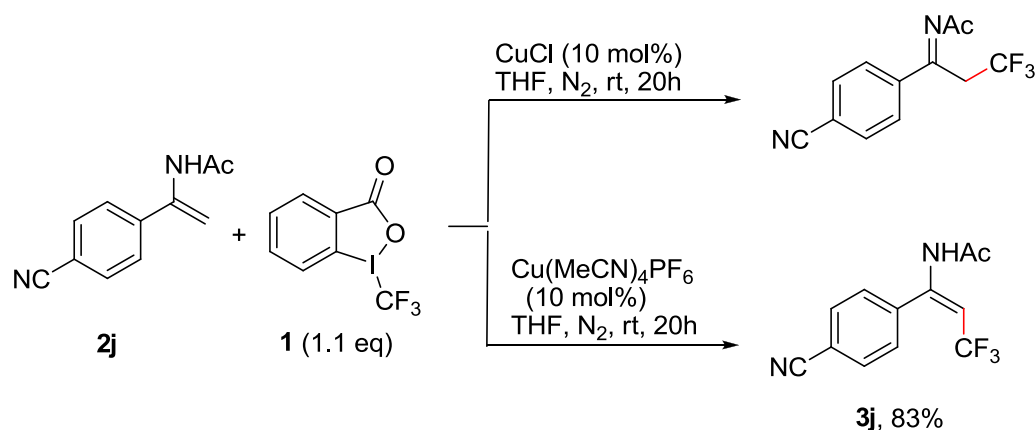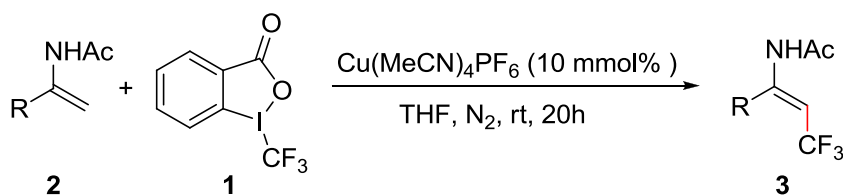

**Synthetic procedure:** An oven-dried 5mL Schlenk tube was charged with Togni's reagent **1** (0.11 mmol), **2** (0.1 mmol),  $\text{Cu}(\text{MeCN})_4\text{PF}_6$  (0.01 mmol) in sequence. The Schlenk tube was vacuumed and backfilled with nitrogen for three times followed by adding anhydrous THF (0.5 mL) through syringe and then closed tightly. After stirring at room temperature for 20 hours, saturated  $\text{NaHCO}_3$  solution (20 mL) was added and the resulting mixture was extracted with dichloromethane (2x20 mL). Removal of the solvent in vacuo and purification of the residue by silica gel column chromatography afforded the desired product **3**.

## Characterization of products

### (*E*)-*N*-(3,3,3-trifluoro-1-phenylprop-1-enyl)acetamide:

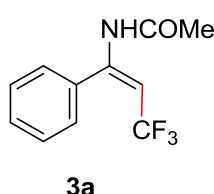

Yield: 90%; White solid. m.p. = 141-143 °C; **<sup>1</sup>H NMR (400 MHz, CDCl<sub>3</sub>):** δ 2.08 (s, 3H), 6.72 (s, 1H), 7.05 (q, <sup>3</sup>*J*<sub>HF</sub> = 8.24 Hz, 1H), 7.34-7.38 (m, 2H), 7.40-7.47 (m, 3H) ppm; **<sup>13</sup>C NMR (100 MHz, CDCl<sub>3</sub>):** δ 24.9, 103.0 (q, *J* = 35.10 Hz), 122.9, 125.6, 128.1 (d, *J* = 1.35 Hz), 128.6, 129.8, 135.0, 143.7 (q, *J* = 5.70 Hz), 169.0 ppm; **<sup>19</sup>F NMR (282 MHz, CDCl<sub>3</sub>):** δ -54.22 (d, <sup>3</sup>*J*<sub>HF</sub> = 8.27 Hz, 3F) ppm; **HRMS (ESI, m/z):** calcd for C<sub>11</sub>H<sub>11</sub>NOF<sub>3</sub> [M+H]<sup>+</sup> 230.0793, found: 230.0782.

### (*E*)-*N*-(3,3,3-trifluoro-1-m-tolylprop-1-enyl)acetamide:

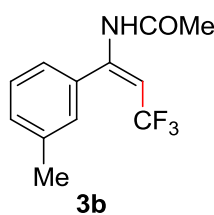

Yield: 86%; White solid. m.p. = 137-139 °C; **<sup>1</sup>H NMR (400 MHz, CDCl<sub>3</sub>):** δ 2.08 (s, 3H), 2.39 (s, 3H), 6.68 (s, 1H), 7.04 (q, <sup>3</sup>*J*<sub>HF</sub> = 8.28 Hz, 1H), 7.16 (s, 2H), 7.24-7.32 (m, 2H) ppm; **<sup>13</sup>C NMR (100 MHz, CDCl<sub>3</sub>):** δ 21.3, 24.9, 102.7 (q, *J* = 34.80 Hz), 122.9, 125.2 (d, *J* = 1.39 Hz), 125.6, 128.5, 128.6 (d, *J* = 1.28 Hz), 130.5, 134.9, 138.5, 143.9 (q, *J* = 6.04 Hz), 168.9 ppm; **<sup>19</sup>F NMR (282 MHz, CDCl<sub>3</sub>):** δ -54.24 (d, <sup>3</sup>*J*<sub>HF</sub> = 8.33 Hz, 3F) ppm; **HRMS (ESI, m/z):** calcd for C<sub>12</sub>H<sub>13</sub>NOF<sub>3</sub> [M+H]<sup>+</sup> 244.0949, found: 244.0959.

### (*E*)-*N*-(1-(2,4-dimethylphenyl)-3,3,3-trifluoroprop-1-enyl)acetamide:

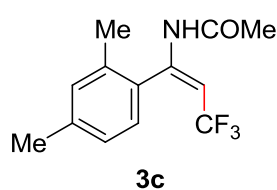

Yield: 84%; White solid. m.p. = 144-146 °C; **<sup>1</sup>H NMR (400 MHz, CDCl<sub>3</sub>):** δ 2.06 (s, 3H), 2.27 (s, 3H), 2.34 (s, 3H), 6.56 (s, 1H), 7.02-7.13 (m, 4H) ppm; **<sup>13</sup>C NMR (100 MHz, CDCl<sub>3</sub>):** δ 18.8, 21.2, 24.8, 103.5 (q, *J* = 34.71 Hz), 122.9, 125.6, 126.5, 128.9 (d, *J* = 1.30 Hz), 131.1, 131.4, 135.6, 139.6, 143.3 (q, *J* = 5.91 Hz), 169.0 ppm; **<sup>19</sup>F NMR (282 MHz, CDCl<sub>3</sub>):** δ -41.15 (d, <sup>3</sup>*J*<sub>HF</sub> = 10.94 Hz, 3F) ppm; **HRMS (ESI, m/z):** calcd for C<sub>13</sub>H<sub>14</sub>NOF<sub>3</sub>Na [M+Na]<sup>+</sup> 280.0925, found: 280.0924.

### (*E*)-*N*-(3,3,3-trifluoro-1-(4-methoxyphenyl)prop-1-enyl)acetamide:



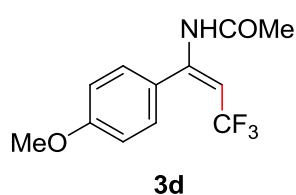

Yield: 77%; White solid. m.p. = 142-144 °C; **<sup>1</sup>H NMR (400 MHz, CDCl<sub>3</sub>):** δ 2.09 (s, 3H), 3.83 (s, 3H), 6.69 (s, 1H), 6.89-7.00 (m, 3H), 7.27-7.30 (m, 2H) ppm; **<sup>13</sup>C NMR (100 MHz, CDCl<sub>3</sub>):** δ 24.9, 55.3, 102.9 (q, *J* = 34.85 Hz), 114.0, 123.0, 125.7, 127.2, 129.5 (d, *J* = 1.49 Hz), 143.5 (q, *J* = 6.30 Hz), 160.6, 169.0 ppm; **<sup>19</sup>F NMR (282 MHz, CDCl<sub>3</sub>):** δ -54.15 (d, <sup>3</sup>*J*<sub>HF</sub> = 8.32 Hz, 3F) ppm; **HRMS (ESI, m/z):** calcd for C<sub>12</sub>H<sub>13</sub>NO<sub>2</sub>F<sub>3</sub> [M+H]<sup>+</sup> 260.0898, found: 260.0890.

**(E)-N-(3,3,3-trifluoro-1-(2-(piperidin-1-yl)phenyl)prop-1-en-1-yl)acetamide:**

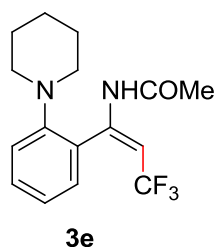

Yield: 90%; White solid. m.p. = 131-133 °C; **<sup>1</sup>H NMR (400 MHz, CDCl<sub>3</sub>):** δ 1.58-1.60 (m, 2H), 1.64-1.69 (m, 4H), 2.10 (s, 3H), 2.99-3.01 (m, 4H), 7.01-7.14 (m, 3H), 7.35-7.39 (m, 2H), 8.00 (s, 1H) ppm; **<sup>13</sup>C NMR (100 MHz, CDCl<sub>3</sub>):** δ 24.0, 24.9, 26.8, 52.6, 102.9 (q, *J* = 34.97 Hz), 118.8, 119.2, 122.3, 123.1, 125.8, 127.5, 130.8, 132.1 (q, *J* = 3.09 Hz), 144.7 (q, *J* = 6.40 Hz), 150.2, 169.1 ppm; **<sup>19</sup>F NMR (282 MHz, CDCl<sub>3</sub>):** δ -54.12 (d, <sup>3</sup>*J*<sub>HF</sub> = 8.81 Hz, 3F) ppm; **HRMS (ESI, m/z):** calcd for C<sub>16</sub>H<sub>20</sub>N<sub>2</sub>OF<sub>3</sub> [M+H]<sup>+</sup> 313.1528, found: 313.1527.

**(E)-2-(1-acetamido-3,3,3-trifluoroprop-1-en-1-yl)benzyl acetate:**

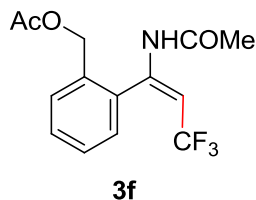

Yield: 76%; White solid. m.p. = 107-109 °C; **<sup>1</sup>H NMR (400 MHz, CDCl<sub>3</sub>):** δ 2.08 (s, 3H), 2.11 (s, 3H), 4.96 (d, *J* = 13.03 Hz, 1H), 5.17 (d, *J* = 13.03 Hz, 1H), 7.19 (q, <sup>3</sup>*J*<sub>HF</sub> = 8.15 Hz, 1H), 7.27-7.29 (m, 1H), 7.34-7.38 (m, 1H), 7.41-7.45 (m, 2H), 7.56 (s, 1H) ppm; **<sup>13</sup>C NMR (100 MHz, CDCl<sub>3</sub>):** δ 21.0, 24.8, 63.9, 104.3 (q, *J* = 34.82 Hz), 122.8, 125.5, 128.3 (d, *J* = 4.38 Hz), 129.7 (d, *J* = 1.67 Hz), 130.0, 133.2, 134.1, 142.4 (q, *J* = 5.93 Hz), 169.4, 171.3 ppm; **<sup>19</sup>F NMR (282 MHz, CDCl<sub>3</sub>):** δ -55.24 (d, <sup>3</sup>*J*<sub>HF</sub> = 8.10 Hz, 3F) ppm; **HRMS (ESI, m/z):** calcd for C<sub>14</sub>H<sub>15</sub>NO<sub>3</sub>F<sub>3</sub> [M+H]<sup>+</sup> 302.1004, found: 302.1003.

**(E)-N-(1-(biphenyl-4-yl)-3,3,3-trifluoroprop-1-en-1-yl)acetamide:**

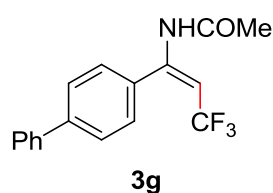

Yield: 84%; White solid. m.p. = 164-166 °C; **<sup>1</sup>H NMR (400 MHz, CDCl<sub>3</sub>):** δ 2.10 (s, 3H), 6.75 (s, 1H), 7.08 (q, <sup>3</sup>*J*<sub>HF</sub> = 8.27 Hz, 1H), 7.37-7.48 (m, 5H), 7.58-7.65 (m, 4H) ppm; **<sup>13</sup>C NMR (100 MHz, CDCl<sub>3</sub>):** δ 24.9, 103.1 (q, *J* =

34.96 Hz), 122.9, 125.6, 127.1, 127.3, 127.9, 128.6 (d,  $J = 1.70$  Hz), 128.9, 133.8, 139.9, 142.7, 143.5 (q,  $J = 5.99$  Hz), 169.0 ppm;  **$^{19}\text{F}$  NMR (282 MHz,  $\text{CDCl}_3$ ):**  $\delta$  -54.11 (d,  $^3J_{\text{HF}} = 8.33$  Hz, 3F) ppm; **HRMS (ESI,  $m/z$ ):** calcd for  $\text{C}_{17}\text{H}_{14}\text{NOF}_3\text{Na}$   $[\text{M}+\text{Na}]^+$  328.0925, found: 328.0912.

**(*E*)-*N*-(3,3,3-trifluoro-1-(4-(trifluoromethyl)phenyl)prop-1-enyl)acetamide:**

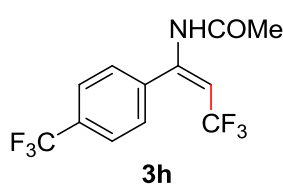

Yield: 84%; White solid. m.p. = 98-100 °C;  **$^1\text{H}$  NMR (400 MHz,  $\text{CDCl}_3$ ):**  $\delta$  2.08 (s, 3H), 6.77 (s, 1H), 7.08 (q,  $^3J_{\text{HF}} = 8.28$  Hz, 1H), 7.49 (d,  $J = 8.10$  Hz, 2H), 7.70 (d,  $J = 8.15$  Hz, 2H), ppm;  **$^{13}\text{C}$  NMR (100 MHz,  $\text{CDCl}_3$ ):**  $\delta$  24.8, 103.9 (q,  $J = 35.18$  Hz), 122.3, 122.6, 125.0, 125.3, 125.7 (q,  $J = 3.85$  Hz), 127.7, 127.9, 128.8 (d,  $J = 1.45$  Hz), 132.0 (q,  $J = 32.73$  Hz), 138.3, 142.3 (q,  $J = 5.94$  Hz), 169.0 ppm;  **$^{19}\text{F}$  NMR (282 MHz,  $\text{CDCl}_3$ ):**  $\delta$  -54.34 (d,  $^3J_{\text{HF}} = 8.25$  Hz, 3F); -63.93 (s, 3F) ppm; **HRMS (ESI,  $m/z$ ):** calcd for  $\text{C}_{12}\text{H}_{10}\text{NOF}_6$   $[\text{M}+\text{H}]^+$  298.0667, found: 298.0658.

**(*E*)-*N*-(1-(4-acetylphenyl)-3,3,3-trifluoroprop-1-enyl)acetamide:**

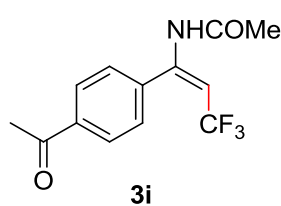

Yield: 92%; White solid. m.p. = 126-128 °C;  **$^1\text{H}$  NMR (400 MHz,  $\text{CDCl}_3$ ):**  $\delta$  2.15 (s, 3H), 2.56 (s, 3H), 7.09 (q,  $^3J_{\text{HF}} = 8.37$  Hz, 1H), (s, 1H), 7.26 (s, 1H), 7.43 (d,  $J = 8.24$  Hz, 2H), 7.87 (d,  $J = 8.24$  Hz, 2H), ppm;  **$^{13}\text{C}$  NMR (100 MHz,  $\text{CDCl}_3$ ):**  $\delta$  24.8, 26.6, 103.5 (q,  $J = 34.86$  Hz), 122.7, 125.4, 128.4, 128.6, 137.5, 139.3, 142.8 (q,  $J = 6.06$  Hz), 169.3, 197.7 ppm;  **$^{19}\text{F}$  NMR (282 MHz,  $\text{CDCl}_3$ ):**  $\delta$  -54.18 (d,  $^3J_{\text{HF}} = 8.28$  Hz, 3F) ppm; **HRMS (ESI,  $m/z$ ):** calcd for  $\text{C}_{13}\text{H}_{12}\text{NO}_2\text{F}_3\text{Na}$   $[\text{M}+\text{Na}]^+$  294.0718, found: 294.0724.

**(*E*)-*N*-(1-(4-cyanophenyl)-3,3,3-trifluoroprop-1-enyl)acetamide:**

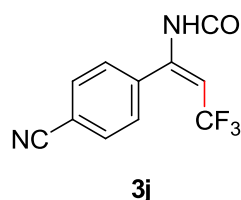

Yield: 83%; White solid. m.p. = 159-161 °C;  **$^1\text{H}$  NMR (400 MHz,  $\text{CDCl}_3$ ):**  $\delta$  2.11 (s, 3H), 7.02 (s, 1H), 7.09 (q,  $^3J_{\text{HF}} = 8.27$  Hz, 1H), 7.50 (d,  $J = 8.24$  Hz, 2H), 7.66 (d,  $J = 8.37$  Hz, 2H) ppm;  **$^{13}\text{C}$  NMR (100 MHz,  $\text{CDCl}_3$ ):**  $\delta$  24.7, 104.0 (q,  $J = 35.13$  Hz), 113.4, 118.0, 122.5, 125.2, 129.4 (d,  $J = 1.37$  Hz), 132.3, 139.2, 141.9 (q,  $J = 6.21$  Hz), 169.2 ppm;  **$^{19}\text{F}$  NMR (282 MHz,  $\text{CDCl}_3$ ):**  $\delta$  -54.26 (d,  $^3J_{\text{HF}} = 8.24$  Hz, 3F) ppm; **HRMS (ESI,  $m/z$ ):** calcd for  $\text{C}_{12}\text{H}_{10}\text{N}_2\text{OF}_3$   $[\text{M}+\text{H}]^+$  255.0745, found: 255.0747.

**(E)-N-(3,3,3-trifluoro-1-(4-(methylsulfonyl)phenyl)prop-1-enyl)acetamide:**

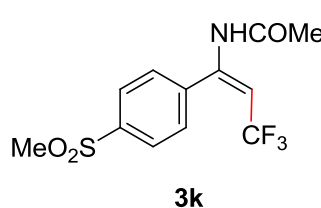

Yield: 85%; Light yellow solid. m.p. = 163-165 °C; <sup>1</sup>H NMR (400 MHz, CDCl<sub>3</sub>): δ 2.15 (s, 3H), 3.01 (s, 3H), 7.14 (q, <sup>3</sup>J<sub>HF</sub> = 8.42 Hz, 1H), 7.55 (d, *J* = 8.20 Hz, 2H), 7.62 (s, 1H), 7.75 (d, *J* = 8.29 Hz, 2H) ppm; <sup>13</sup>C NMR (100 MHz, CDCl<sub>3</sub>): δ 24.7, 44.6, 103.7 (q, *J* = 34.93 Hz), 122.7, 125.4, 127.2, 129.8 (d, *J* = 1.25 Hz), 140.2, 140.6, 142.2 (q, *J* = 5.92 Hz), 169.6 ppm; <sup>19</sup>F NMR (282 MHz, CDCl<sub>3</sub>): δ -53.92 (d, <sup>3</sup>J<sub>HF</sub> = 8.34 Hz, 3F) ppm; HRMS (ESI, *m/z*): calcd for C<sub>12</sub>H<sub>13</sub>NO<sub>3</sub>F<sub>3</sub>S [M+H]<sup>+</sup> 308.0568, found: 308.0575.

**(E)-N-(3,3,3-trifluoro-1-(4-fluorophenyl)prop-1-enyl)acetamide:**

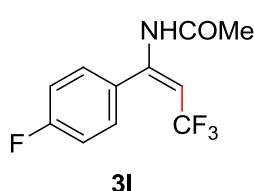

Yield: 80%; White solid. m.p. = 175-177 °C; <sup>1</sup>H NMR (400 MHz, CDCl<sub>3</sub>): δ 2.10 (s, 3H), 6.66 (s, 1H), 7.04 (q, <sup>3</sup>J<sub>HF</sub> = 8.29 Hz, 1H), 7.08-7.14 (m, 2H), 7.33-7.36 (m, 2H) ppm; <sup>13</sup>C NMR (100 MHz, CDCl<sub>3</sub>): δ 24.9, 103.5 (q, *J* = 34.82 Hz), 115.8 (d, *J* = 21.82 Hz), 122.8, 125.5, 130.3 (dd, *J*<sub>1</sub> = 8.64 Hz, *J*<sub>2</sub> = 1.42 Hz), 130.9 (d, *J* = 3.67 Hz), 142.7 (q, *J* = 6.07 Hz), 162.4 (d, *J* = 250.60 Hz), 168.9 ppm; <sup>19</sup>F NMR (282 MHz, CDCl<sub>3</sub>): δ -54.29 (d, <sup>3</sup>J<sub>HF</sub> = 8.22 Hz, 3F), -111.38 (s, 1F) ppm; HRMS (ESI, *m/z*): calcd for C<sub>11</sub>H<sub>10</sub>NOF<sub>4</sub> [M+H]<sup>+</sup> 248.0699, found: 248.0709.

**(E)-N-(1-(4-bromophenyl)-3,3,3-trifluoroprop-1-enyl)acetamide:**

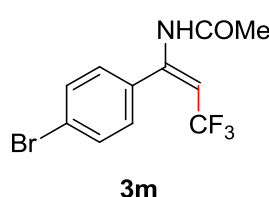

Yield: 85%; White solid. m.p. = 143-145 °C; <sup>1</sup>H NMR (400 MHz, CDCl<sub>3</sub>): δ 2.09 (s, 3H), 6.69 (s, 1H), 7.04 (q, <sup>3</sup>J<sub>HF</sub> = 8.30 Hz, 1H), 7.22-7.25 (m, 2H), 7.55-7.58 (m, 2H) ppm; <sup>13</sup>C NMR (100 MHz, CDCl<sub>3</sub>): δ 24.8, 103.6 (q, *J* = 34.98 Hz), 122.7, 124.2, 125.4, 129.8 (d, *J* = 1.41 Hz), 131.9, 133.7, 142.6 (q, *J* = 6.30 Hz), 168.9 ppm; <sup>19</sup>F NMR (282 MHz, CDCl<sub>3</sub>): δ -54.24 (d, <sup>3</sup>J<sub>HF</sub> = 8.33 Hz, 3F) ppm; HRMS (ESI, *m/z*): calcd for C<sub>11</sub>H<sub>10</sub>NOF<sub>3</sub>Br [M+H]<sup>+</sup> 307.9898, found: 307.9897.

**(E)-N-(1-(2-chlorophenyl)-3,3,3-trifluoroprop-1-enyl)acetamide:**

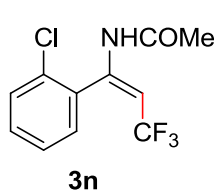

Yield: 84%; White solid. m.p. = 155-157 °C; <sup>1</sup>H NMR (400 MHz, CDCl<sub>3</sub>): δ 2.10 (s, 3H), 6.67 (s, 1H), 7.13 (q, <sup>3</sup>J<sub>HF</sub> = 8.10 Hz, 1H), 7.30-7.35 (m, 2H), 7.37-7.41 (m, 1H), 7.46 (d, *J* =

7.90 Hz, 1H) ppm; **<sup>13</sup>C NMR (100 MHz, CDCl<sub>3</sub>):** δ 24.8, 104.5 (q, *J* = 34.86 Hz), 122.6, 125.2, 126.9, 129.9, 130.9 (d, *J* = 1.45 Hz), 131.1, 132.7, 133.3, 140.8 (q, *J* = 5.95 Hz), 169.1 ppm; **<sup>19</sup>F NMR (282 MHz, CDCl<sub>3</sub>):** δ -56.17 (d, <sup>3</sup>*J*<sub>HF</sub> = 8.19 Hz, 3F) ppm; **HRMS (ESI, m/z):** calcd for C<sub>11</sub>H<sub>10</sub>NOF<sub>3</sub>Cl [M+H]<sup>+</sup> 264.0403, found: 264.0395.

**(*E*)-*N*-(3,3,3-trifluoro-1-(naphthalen-2-yl)prop-1-enyl)acetamide:**

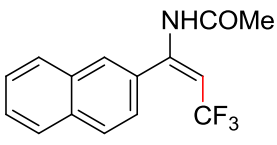  
**3o** Yield: 83%; White solid. m.p. = 153-155 °C; **<sup>1</sup>H NMR (400 MHz, CDCl<sub>3</sub>):** δ 2.07 (s, 3H), 6.79 (s, 1H), 7.12 (q, <sup>3</sup>*J*<sub>HF</sub> = 8.25 Hz, 1H), 7.41 (dd, *J*<sub>1</sub> = 8.44 Hz, *J*<sub>2</sub> = 1.56 Hz, 1H), 7.53-7.59 (m, 2H), 7.84-7.90 (m, 4H) ppm; **<sup>13</sup>C NMR (100 MHz, CDCl<sub>3</sub>):** δ 24.9, 103.3 (q, *J* = 34.74 Hz), 122.9, 125.2 (d, *J* = 1.31 Hz), 125.6, 126.9, 127.3, 127.8, 127.9 (d, *J* = 1.51 Hz), 128.3, 128.5, 132.2, 132.7, 133.5, 143.7 (q, *J* = 5.85 Hz), 169.0 ppm; **<sup>19</sup>F NMR (282 MHz, CDCl<sub>3</sub>):** δ -54.16 (d, <sup>3</sup>*J*<sub>HF</sub> = 8.27 Hz, 3F) ppm; **HRMS (ESI, m/z):** calcd for C<sub>15</sub>H<sub>13</sub>NOF<sub>3</sub> [M+H]<sup>+</sup> 280.0949, found: 280.0946.

**(*E*)-*N*-(3,3,3-trifluoro-1-(thiophen-2-yl)prop-1-enyl)acetamide:**

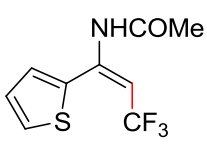  
**3p** Yield: 40%; Light yellow solid. m.p. = 134-136 °C; **<sup>1</sup>H NMR (400 MHz, CDCl<sub>3</sub>):** δ 2.12 (s, 3H), 6.79 (s, 1H), 7.05-7.07 (m, 2H), 7.25 (d, *J* = 3.48 Hz, 1H), 7.45 (d, *J* = 4.95 Hz, 1H) ppm; **<sup>13</sup>C NMR (100 MHz, CDCl<sub>3</sub>):** 24.9, 105.3 (q, *J* = 35.34 Hz), 122.6, 125.3, 127.3, 127.9, 129.8 (d, *J* = 2.06 Hz), 134.4, 136.9 (q, *J* = 6.49 Hz), 168.7 ppm; **<sup>19</sup>F NMR (282 MHz, CDCl<sub>3</sub>):** δ -54.69 (d, <sup>3</sup>*J*<sub>HF</sub> = 8.15 Hz, 3F) ppm; **HRMS (ESI, m/z):** calcd for C<sub>9</sub>H<sub>9</sub>NOF<sub>3</sub>S [M+H]<sup>+</sup> 236.0357, found: 236.0357.

***N*-(2-(trifluoromethyl)-1H-inden-3-yl)acetamide:**

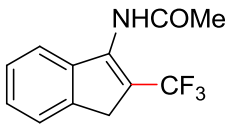  
**3q** Yield: 87%; White solid. m.p. = 173-175 °C; **<sup>1</sup>H NMR (400 MHz, CDCl<sub>3</sub>):** δ 2.20 (s, 3H), 3.54 (s, 2H), 7.30-7.34 (m, 2H), 7.40-7.45 (m, 2H), 7.50 (s, 1H) ppm; **<sup>13</sup>C NMR (100 MHz, CDCl<sub>3</sub>):** δ 23.4, 35.4, 121.9, 122.8, 124.0, 124.6, 126.7, 127.7, 139.2, 140.3 (q, *J* = 4.35 Hz), 140.9, 168.9 ppm; **<sup>19</sup>F NMR (282 MHz, CDCl<sub>3</sub>):** δ -59.69 (s, 3F) ppm; **HRMS (ESI, m/z):** calcd for C<sub>12</sub>H<sub>11</sub>NOF<sub>3</sub> [M+H]<sup>+</sup> 242.0793, found: 242.0795.

***N*-(5-methyl-2-(trifluoromethyl)-1H-inden-3-yl)acetamide:**

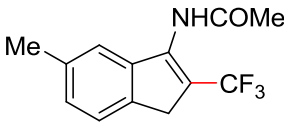  
**3r** Yield: 86%; White solid. m.p. = 191-193 °C; <sup>1</sup>H NMR (400 MHz, CDCl<sub>3</sub>): δ 2.22 (s, 3H), 2.38 (s, 3H), 3.51 (s, 2H), 7.14 (d, *J* = 7.57 Hz, 1H), 7.23 (s, 1H), 7.30 (d, *J* = 7.58 Hz, 1H), 7.40 (s, 1H) ppm; <sup>13</sup>C NMR (100 MHz, CDCl<sub>3</sub>): δ 21.5, 23.5, 35.0, 121.9, 123.2, 123.7, 124.6, 128.7, 136.5, 138.1, 139.4, 140.2 (q, *J* = 4.27 Hz), 168.8 ppm; <sup>19</sup>F NMR (282 MHz, CDCl<sub>3</sub>): δ -59.64 (s, 3F) ppm; HRMS (ESI, *m/z*): calcd for C<sub>13</sub>H<sub>13</sub>NOF<sub>3</sub> [M+H]<sup>+</sup> 256.0949, found: 256.0950.

***(E)*-N-(1,1,1-trifluoro-5-phenylpent-2-en-3-yl)acetamide:**

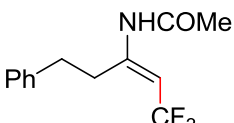  
**3s** Yield: 60%; White solid. m.p. = 77-79 °C; <sup>1</sup>H NMR (400 MHz, CDCl<sub>3</sub>): δ 1.8 (s, 3H), 2.60 (t, *J* = 7.38 Hz, 2H), 2.88 (t, *J* = 7.39 Hz, 2H), 6.21 (s, 1H), 6.76 (q, <sup>3</sup>*J*<sub>HF</sub> = 8.75 Hz, 1H), 7.2-7.29 (m, 3H), 7.32-7.36 (m, 2H) ppm; <sup>13</sup>C NMR (100 MHz, CDCl<sub>3</sub>): δ 24.6, 33.9, 34.9, 102.3 (q, *J* = 35.07 Hz), 123.7, 126.4, 126.8, 128.4, 128.9, 140.1, 144.7 (q, *J* = 5.90 Hz), 168.9 ppm; <sup>19</sup>F NMR (282 MHz, CDCl<sub>3</sub>): δ -54.84 (d, <sup>3</sup>*J*<sub>HF</sub> = 8.74 Hz, 3F) ppm; HRMS (ESI, *m/z*): calcd for C<sub>13</sub>H<sub>15</sub>NOF<sub>3</sub> [M+H]<sup>+</sup> 258.1106, found: 258.1107.

## Reactivity profile of $\beta$ -substituted acyclic enamides toward Togni's reagent **1**.

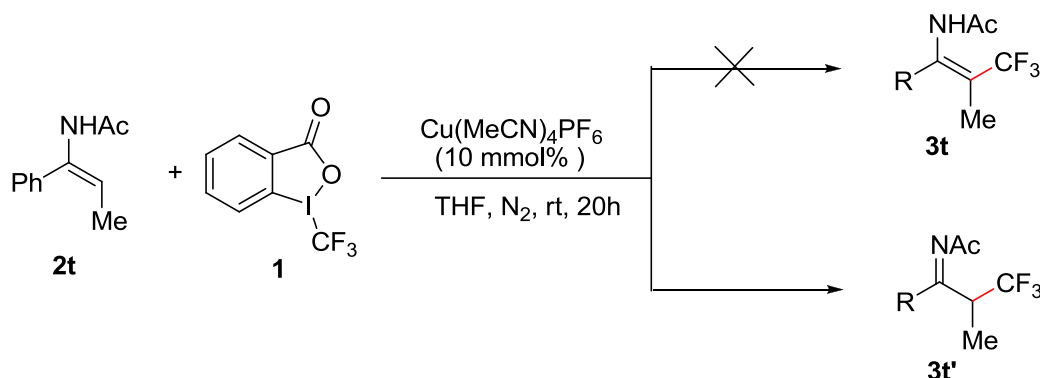

When **2t** was reacted with Togni's reagent **1** with the optimized reaction condition for olefinic trifluoromethylation, the  $\alpha$ -trifluoromethyl imine **3t'** was formed instead of the expected product **3t**. We surmise the reactivity difference between acyclic enamide **2t** and cyclic enamides **2q** and **2r** could be attributed to the steric repulsion (which makes the **3t** unfavorable) and thermodynamic stability of endo alkene skeleton in the case of cyclic substrates or ring strain (which promotes the 1,3-hydrogen shift to afford **3q** and **3r**).

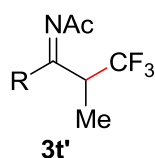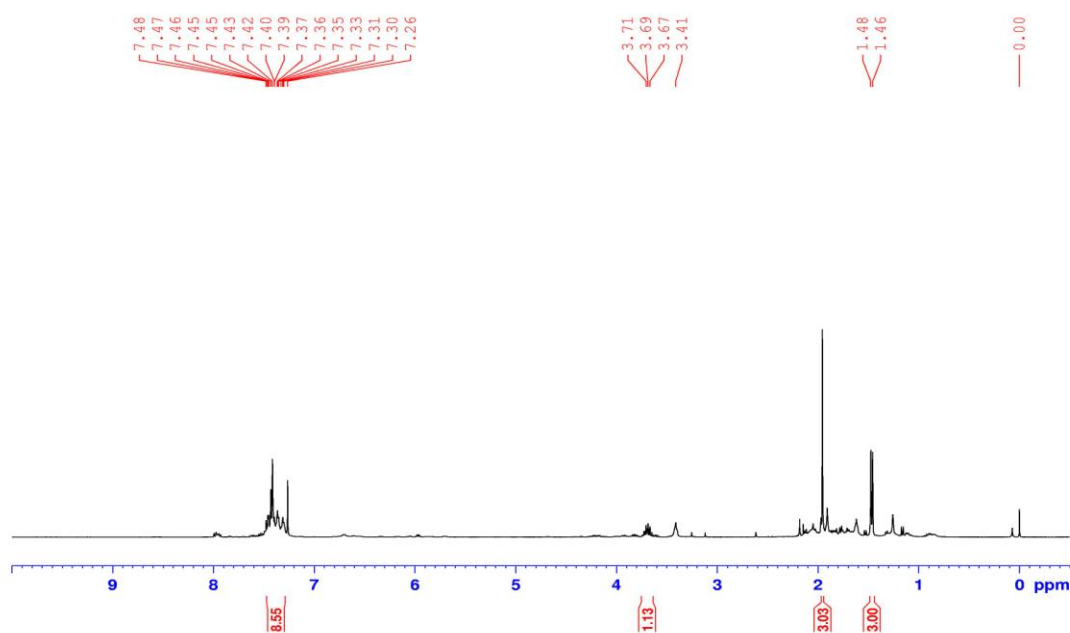

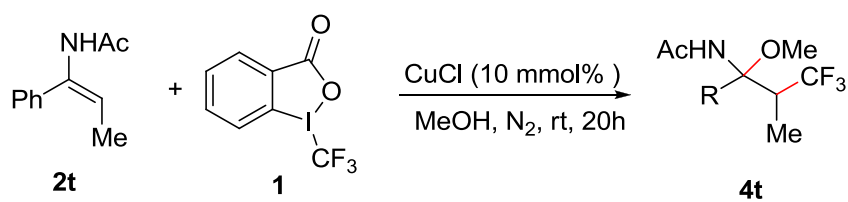

When **2t** was reacted with Togni's reagent **1** with the optimized reaction condition for oxytrifluoromethylation the desired product **4t** was formed in almost quantitative yield.

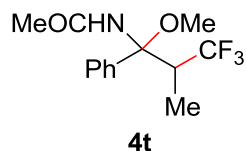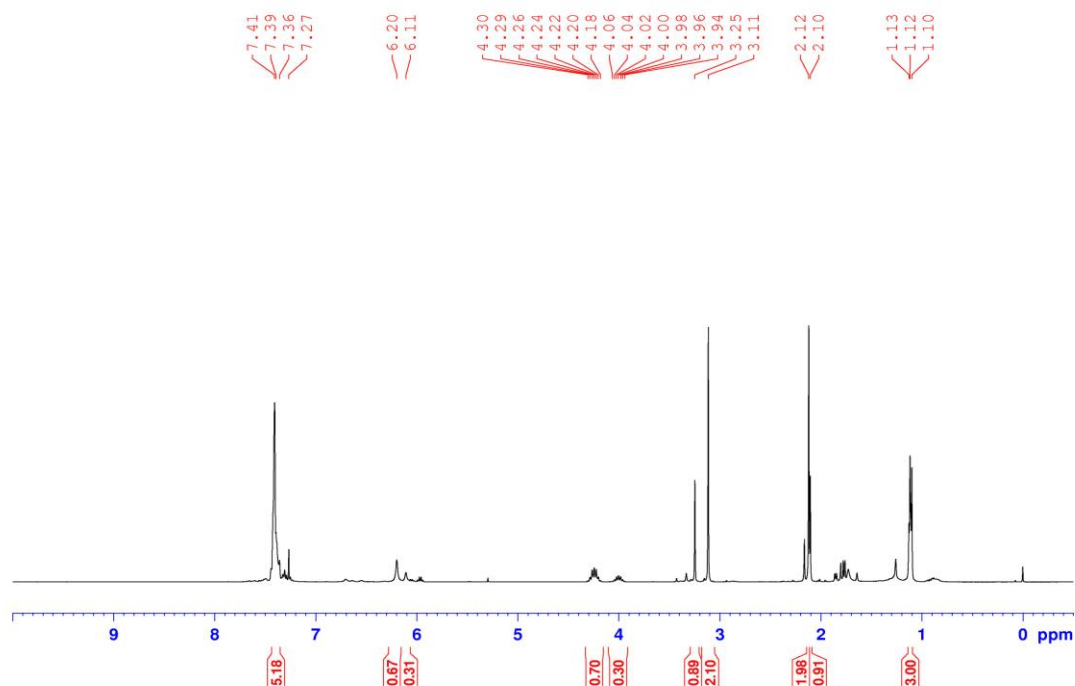

## Control experiments

### 1) Follow Wang's method for the generation of TEMPO-CF<sub>3</sub>.<sup>[3]</sup>

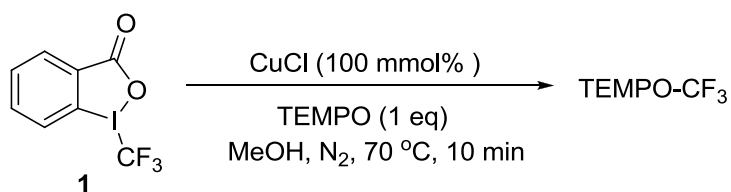

The <sup>19</sup>F NMR of Togni's reagent **1** and TEMPO-CF<sub>3</sub>

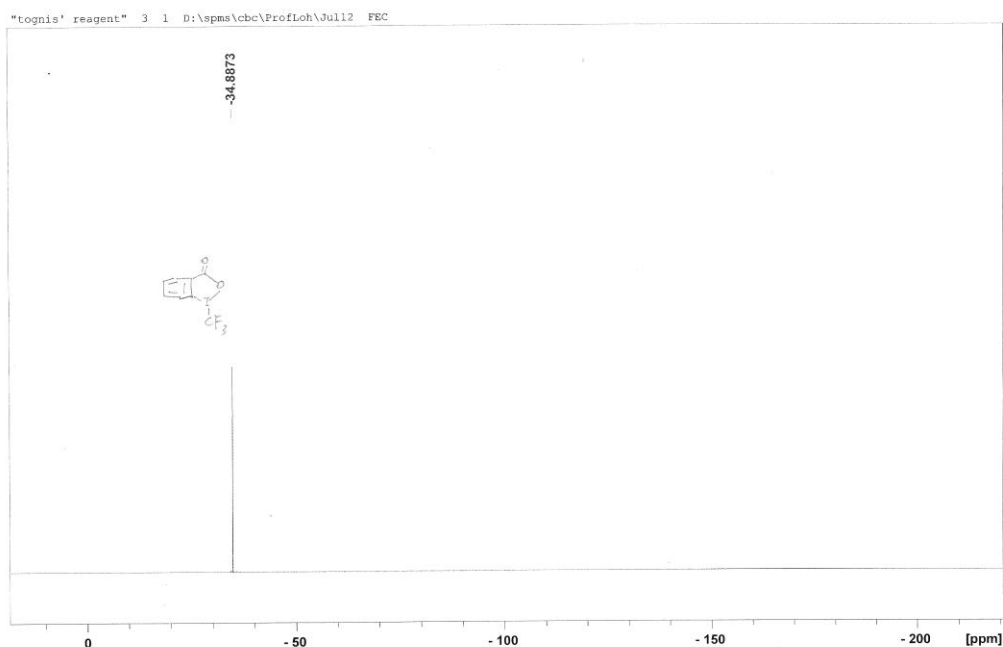

[3] X. Wang, Y. Ye, S. Zhang, J. Feng, Y. Xu, Y. Zhang and J. Wang, *J. Am. Chem. Soc.*, 2011, **133**, 16410.



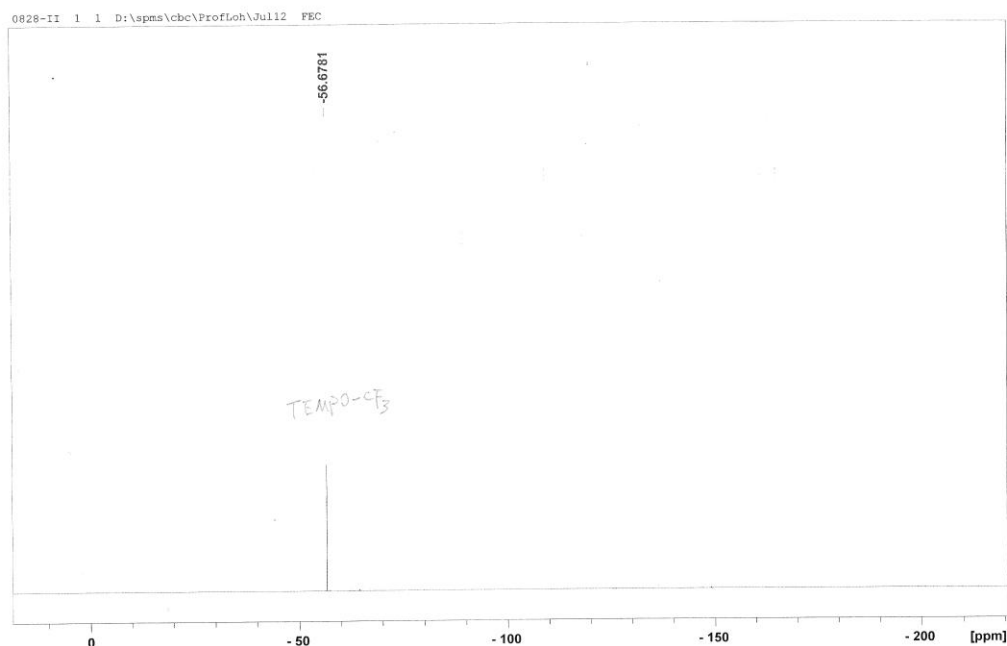

## 2) TEMPO as radical scavenger

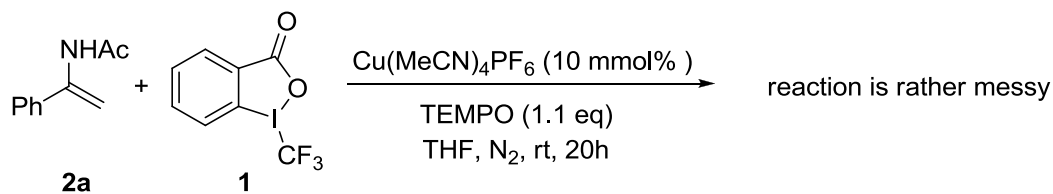

**General procedure:** An oven-dried 5mL Schlenk tube was charged with Tognis' reagent **1** (0.11 mmol), **2a** (0.1 mmol), Cu(MeCN)<sub>4</sub>PF<sub>6</sub> (0.01 mmol) in sequence. The Schlenk tube was vacuumed and backfilled with nitrogen for three times followed by adding TEMPO (0.11 mmol) and anhydrous THF (0.5 mL) through syringe and then closed tightly. After stirring at room temperature for 20 hours the solvent was evaporated and the crude mixture was dissolved in CDCl<sub>3</sub> for <sup>19</sup>F (decoupled) analysis.

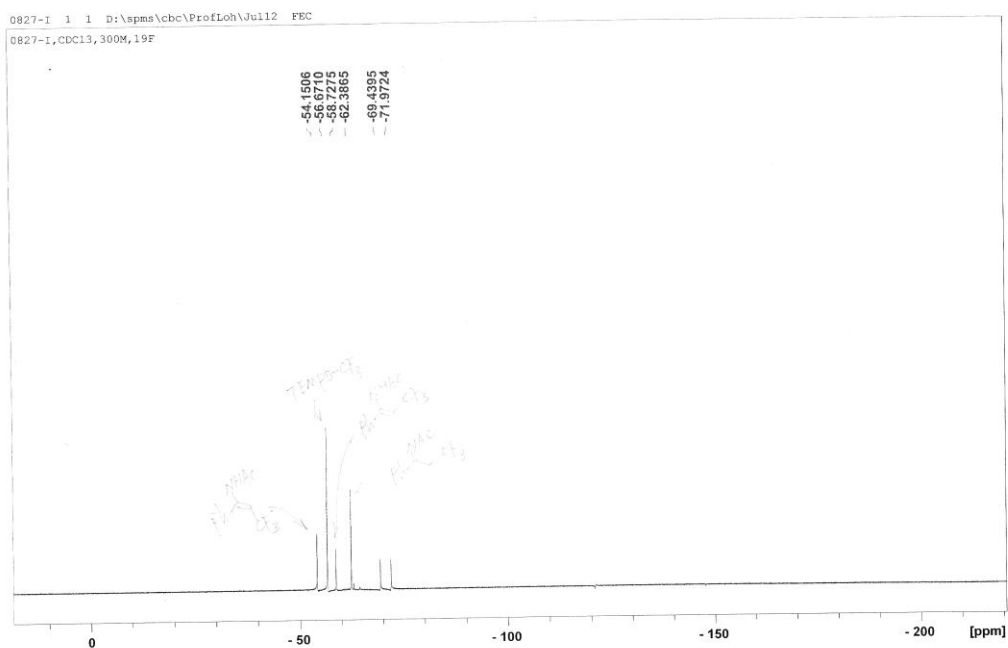

The above crude mixture was washed with saturated NaHCO<sub>3</sub> solution (20 mL) and extracted with dichloromethane (2x20 mL). After evaporation of organic solvent, the crude product was subjected to vacuum and the resulting mixture was dissolved in CDCl<sub>3</sub> for <sup>19</sup>F (non-decoupled) analysis.

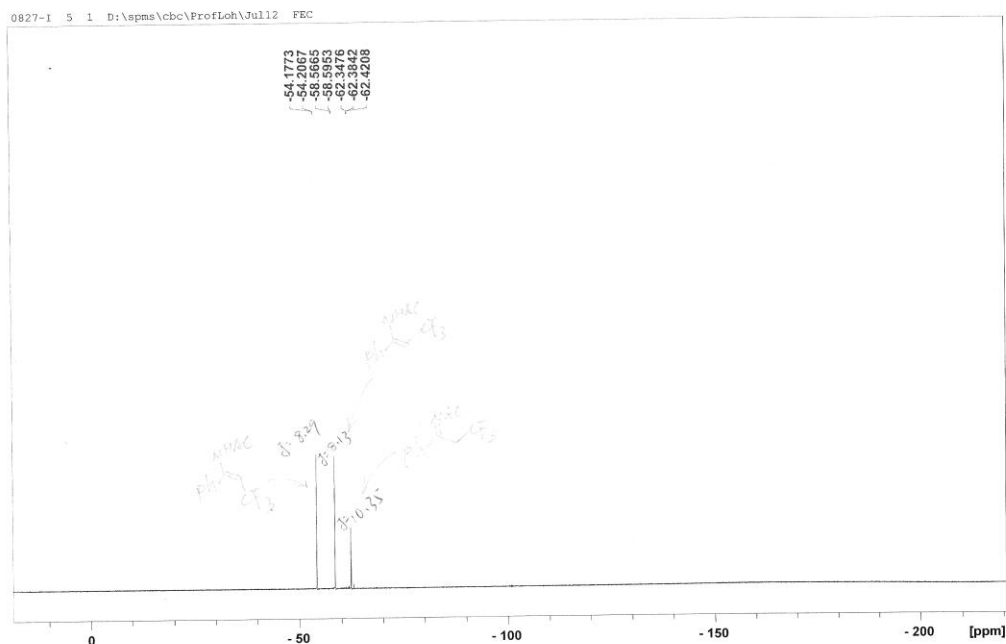

### 3) BHT as radical scavenger

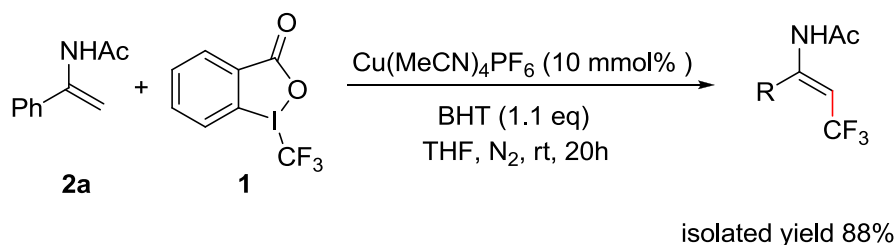

**General procedure:** An oven-dried 5mL Schlenk tube was charged with Tognis' reagent **1** (0.11 mmol), **2a** (0.1 mmol), Cu(MeCN)<sub>4</sub>PF<sub>6</sub> (0.01 mmol), BHT (0.11 mmol) in sequence. The Schlenk tube was vacuumed and backfilled with nitrogen for three times followed by adding anhydrous THF (0.5 mL) through syringe and then closed tightly. After stirring at room temperature for 20 hours, saturated NaHCO<sub>3</sub> solution (20 mL) was added and the resulting mixture was extracted with dichloromethane (2x20 mL). Removal of the solvent in vacuo and purification of the residue by silica gel column chromatography afforded the desired product **3a** (88% yield) .

#### 4) CuCl<sub>2</sub> as catalyst

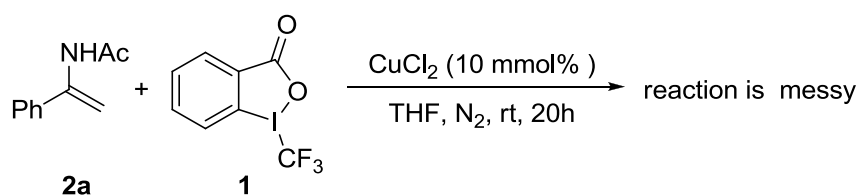

**General procedure:** An oven-dried 5mL Schlenk tube was charged with Tognis' reagent **1** (0.11 mmol), **2a** (0.1 mmol), CuCl<sub>2</sub> (0.01 mmol) in sequence. The Schlenk tube was vacuumed and backfilled with nitrogen for three times followed by adding anhydrous THF (0.5 mL) through syringe and then closed tightly. After stirring at room temperature for 20 hours the solvent was evaporated and the crude mixture was dissolved in CDCl<sub>3</sub> for <sup>19</sup>F (non-decoupled) analysis.

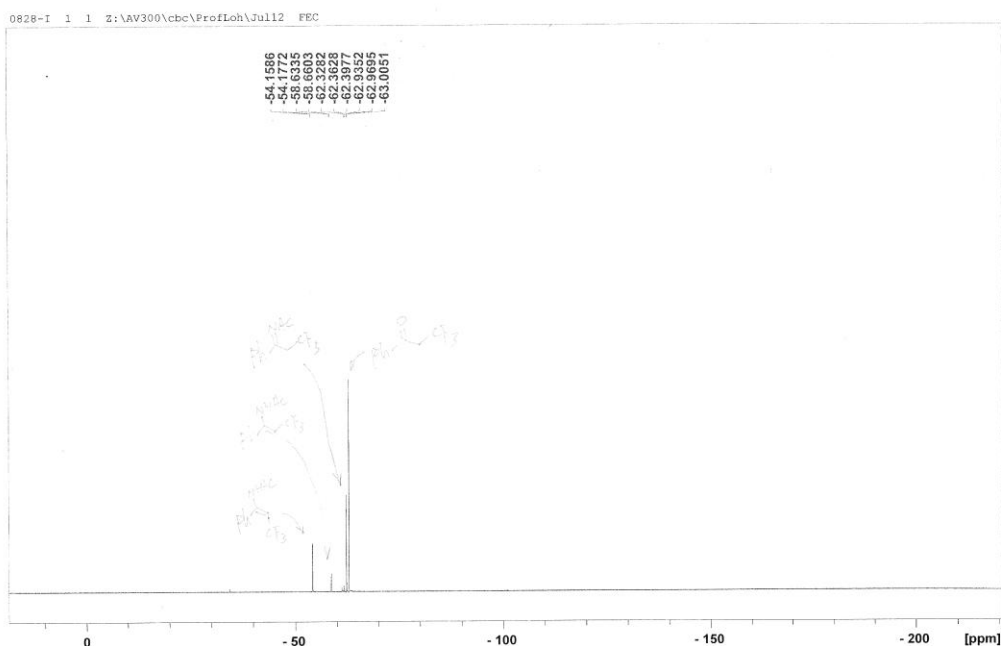

## Copper-catalyzed oxytrifluoromethylation of enamides

### General reaction scheme

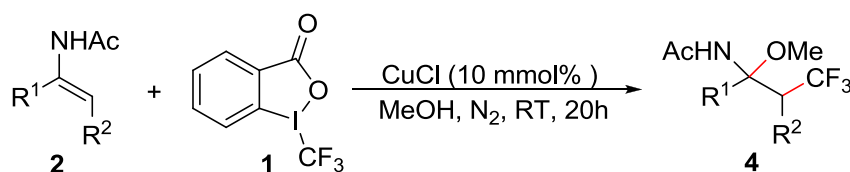

**Synthetic procedure:** An oven-dried 5mL Schlenk tube was charged with Togni's reagent **1** (0.11 mmol), **2** (0.1 mmol), CuCl (0.01 mmol) in sequence. The Schlenk tube was vacuumed and backfilled with nitrogen for three times followed by adding anhydrous MeOH (0.5 mL) through syringe and then closed tightly. After stirring at room temperature for 20 hours, saturated NaHCO<sub>3</sub> solution (20 mL) was added and the resulting mixture was extracted with dichloromethane (2x20 mL). Removal of the solvent in vacuo afforded the desired product **4**, which is pure enough for NMR characterization.

### Characterization of products

#### *N*-(3,3,3-trifluoro-1-methoxy-1-phenylpropyl)acetamide:

**4a** <sup>1</sup>H NMR (400 MHz, CDCl<sub>3</sub>): δ 2.50 (s, 3H), 3.10 (s, 3H), 3.28-3.37 (m, 1H), 3.42-3.51 (m, 1H), 6.32 (s, 1H), 7.35-7.44 (m, 5H) ppm; <sup>13</sup>C NMR (100 MHz, CDCl<sub>3</sub>): δ 24.0, 40.4 (q, *J* = 26.81 Hz), 49.9, 86.5 (d, *J* = 2.82 Hz), 123.5, 125.9, 126.3, 128.6, 128.8, 138.9, 170.2 ppm; <sup>19</sup>F NMR (282 MHz, CDCl<sub>3</sub>): δ -62.98 (t, <sup>3</sup>*J*<sub>HF</sub> = 10.19 Hz, 3F) ppm; HRMS (ESI, *m/z*): calcd for C<sub>12</sub>H<sub>14</sub>NO<sub>2</sub>F<sub>3</sub>Na [M+Na]<sup>+</sup> 284.0874, found: 284.0878.

#### *N*-(3,3,3-trifluoro-1-methoxy-1-*m*-tolylpropyl)acetamide:

**4b** <sup>1</sup>H NMR (400 MHz, CDCl<sub>3</sub>): δ 2.09 (s, 3H), 2.39 (s, 3H), 3.10 (s, 3H), 3.29-3.37 (m, 1H), 3.43-3.56 (m, 1H), 6.15 (s, 1H), 7.17-7.32 (m, 4H) ppm; <sup>13</sup>C NMR (100 MHz, CDCl<sub>3</sub>): δ 21.6, 24.2, 40.4 (q, *J* = 26.75 Hz), 49.9, 86.5 (d, *J* = 3.26 Hz), 123.0, 123.5, 126.3, 126.4, 128.5, 129.6, 138.4, 138.9, 170.0 ppm; <sup>19</sup>F

**NMR (282 MHz, CDCl<sub>3</sub>):**  $\delta$  -61.78 (t,  $^3J_{\text{HF}} = 10.50$  Hz, 3F) ppm; **HRMS (ESI, m/z):** calcd for C<sub>13</sub>H<sub>16</sub>NO<sub>2</sub>F<sub>3</sub>Na [M+Na]<sup>+</sup> 298.1031, found: 298.1035.

**N-(1-(biphenyl-4-yl)-3,3,3-trifluoro-1-methoxypropyl)acetamide:**

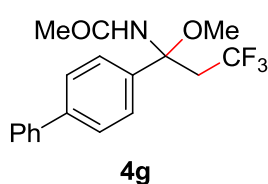

**<sup>1</sup>H NMR (400 MHz, CDCl<sub>3</sub>):**  $\delta$  2.09 (s, 3H), 3.14 (s, 3H), 3.32-3.56 (m, 2H), 6.23 (s, 1H), 7.34-7.38 (m, 1H), 7.43-7.50 (m, 4H), 7.58-7.64 (m, 4H) ppm; **<sup>13</sup>C NMR (100 MHz, CDCl<sub>3</sub>):**  $\delta$  24.1, 40.2 (q,  $J = 26.68$  Hz), 50.0, 86.5, 123.6, 126.3, 126.4, 127.1, 127.3, 127.7, 128.8, 137.9, 140.1, 141.6, 170.1 ppm; **<sup>19</sup>F NMR (282 MHz, CDCl<sub>3</sub>):**  $\delta$  -61.62 (t,  $^3J_{\text{HF}} = 10.46$  Hz, 3F) ppm; **HRMS (ESI, m/z):** calcd for C<sub>18</sub>H<sub>18</sub>NO<sub>2</sub>F<sub>3</sub>Na [M+Na]<sup>+</sup> 360.1187, found: 360.1185.

**N-(3,3,3-trifluoro-1-methoxy-1-(4(trifluoromethyl)phenyl)propyl)acetamide:**

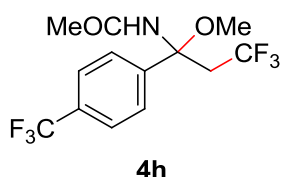

**<sup>1</sup>H NMR (400 MHz, CDCl<sub>3</sub>):**  $\delta$  2.06 (s, 3H), 3.14 (s, 3H), 3.32-3.43 (m, 2H), 6.23 (s, 1H), 7.58 (d,  $J = 8.36$  Hz, 2H), 7.67 (d,  $J = 8.36$  Hz, 2H) ppm; **<sup>13</sup>C NMR (100 MHz, CDCl<sub>3</sub>):**  $\delta$  24.0, 39.8 (q,  $J = 26.86$  Hz), 50.3, 86.3 (d,  $J = 2.83$  Hz), 122.4, 123.3, 125.1, 125.6 (q,  $J = 3.62$  Hz), 126.1, 126.6, 131.0 (q,  $J = 32.62$  Hz), 143.2, 170.0 ppm; **<sup>19</sup>F NMR (282 MHz, CDCl<sub>3</sub>):**  $\delta$  -61.61 (t,  $^3J_{\text{HF}} = 10.35$  Hz, 3F), -63.76 (s, 3F) ppm; **HRMS (ESI, m/z):** calcd for C<sub>13</sub>H<sub>13</sub>NO<sub>2</sub>F<sub>6</sub>Na [M+Na]<sup>+</sup> 352.0748, found: 352.0757.

**N-(1-(4-acetylphenyl)-3,3,3-trifluoro-1-methoxypropyl)acetamide:**

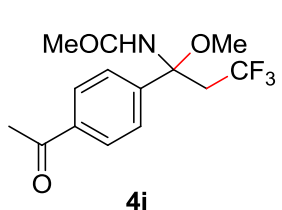

**<sup>1</sup>H NMR (400 MHz, CDCl<sub>3</sub>):**  $\delta$  2.09 (s, 3H), 2.61 (s, 3H), 3.15 (s, 3H), 3.38 (q,  $J = 10.38$  Hz, 2H), 6.34 (s, 1H), 7.56 (d,  $J = 8.42$  Hz, 2H), 7.97 (d,  $J = 8.44$  Hz, 2H) ppm; **<sup>13</sup>C NMR (100 MHz, CDCl<sub>3</sub>):**  $\delta$  24.0, 26.6, 39.9 (q,  $J = 27.02$  Hz), 50.2, 86.3 (d,  $J = 2.83$  Hz), 123.4, 126.1, 126.4, 128.6, 137.2, 144.2, 170.0, 197.5 ppm; **<sup>19</sup>F NMR (282 MHz, CDCl<sub>3</sub>):**  $\delta$  -61.60 (t,  $^3J_{\text{HF}} = 10.35$  Hz, 3F) ppm; **HRMS (ESI, m/z):** calcd for C<sub>14</sub>H<sub>16</sub>NO<sub>3</sub>F<sub>3</sub>Na [M+Na]<sup>+</sup> 326.0980, found: 326.0986.

**N-(1-(4-cyanophenyl)-3,3,3-trifluoro-1-methoxypropyl)acetamide:**

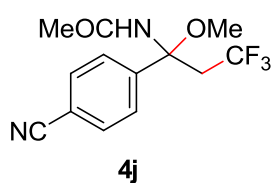

**<sup>1</sup>H NMR (400 MHz, CDCl<sub>3</sub>):**  $\delta$  2.08 (s, 3H), 3.18 (s, 3H), 3.23-3.39 (m, 2H), 6.21 (s, 1H), 7.59 (d,  $J = 8.39$  Hz, 2H), 7.70 (d,  $J = 8.31$  Hz, 2H) ppm; **<sup>13</sup>C NMR (100 MHz, CDCl<sub>3</sub>):**  $\delta$  24.0, 39.7 (q,  $J = 27.09$  Hz), 50.5, 86.1 (d,  $J =$

3.05 Hz), 112.7, 118.2, 127.0, 132.4, 144.6, 169.9 ppm; **<sup>19</sup>F NMR (282 MHz, CDCl<sub>3</sub>):** δ -61.51 (t, <sup>3</sup>J<sub>HF</sub> = 10.28 Hz, 3F) ppm; **HRMS (ESI, m/z):** calcd for C<sub>13</sub>H<sub>13</sub>N<sub>2</sub>O<sub>2</sub>F<sub>3</sub>Na [M+Na]<sup>+</sup> 309.0827, found: 309.0829.

***N*-(3,3,3-trifluoro-1-methoxy-1-(4(methylsulfonyl)phenyl)propyl)acetamide:**

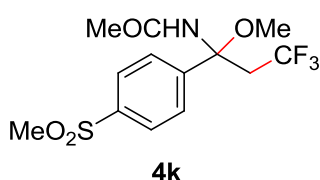

**<sup>1</sup>H NMR (400 MHz, CDCl<sub>3</sub>):** δ 2.09 (s, 3H), 3.06 (s, 3H), 3.17 (s, 3H), 3.27-3.43 (m, 2H), 6.51 (s, 1H), 7.68 (d, *J* = 8.50 Hz, 2H), 7.90 (d, *J* = 8.48 Hz, 2H) ppm; **<sup>13</sup>C NMR (100 MHz, CDCl<sub>3</sub>):** δ 24.0, 40.1 (q, *J* = 27.12 Hz), 44.4, 50.4, 86.1 (d, *J* = 2.67 Hz), 123.2, 126.0, 127.4, 127.5, 140.5, 145.7, 170.3 ppm; **<sup>19</sup>F NMR (282 MHz, CDCl<sub>3</sub>):** δ -61.45 (t, <sup>3</sup>J<sub>HF</sub> = 10.32 Hz, 3F) ppm; **HRMS (ESI, m/z):** calcd for C<sub>13</sub>H<sub>16</sub>NO<sub>4</sub>F<sub>3</sub>Na [M+Na]<sup>+</sup> 362.0650, found: 362.0655.

***N*-(3,3,3-trifluoro-1-(4-fluorophenyl)-1-methoxypropyl)acetamide:**

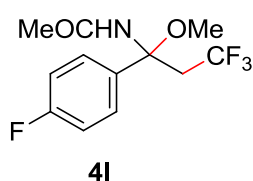

**<sup>1</sup>H NMR (400 MHz, CDCl<sub>3</sub>):** δ 2.07 (s, 3H), 3.11 (s, 3H), 3.31-3.44 (m, 2H), 6.15 (s, 1H), 7.07-7.11 (m, 2H), 7.40-7.44 (m, 2H) ppm; **<sup>13</sup>C NMR (100 MHz, CDCl<sub>3</sub>):** δ 24.1, 40.1 (q, *J* = 26.98 Hz), 50.0, 86.3 (d, *J* = 2.88 Hz), 115.5, 115.7, 123.5, 126.2, 128.0, 128.0, 135.0, 162.8 (d, *J* = 248.08 Hz), 170.0 ppm; **<sup>19</sup>F NMR (282 MHz, CDCl<sub>3</sub>):** δ -61.75 (t, <sup>3</sup>J<sub>HF</sub> = 10.48 Hz, 3F), -113.89--113.94 (m, 1F) ppm; **HRMS (ESI, m/z):** calcd for C<sub>12</sub>H<sub>13</sub>NO<sub>2</sub>F<sub>4</sub>Na [M+Na]<sup>+</sup> 302.0780, found: 302.0779.

***N*-(1-(4-bromophenyl)-3,3,3-trifluoro-1-methoxypropyl)acetamide:**

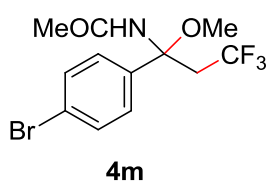

**<sup>1</sup>H NMR (400 MHz, CDCl<sub>3</sub>):** δ 2.06 (s, 3H), 3.11 (s, 3H), 3.29-3.43 (m, 2H), 6.17 (s, 1H), 7.31 (d, *J* = 8.52 Hz, 2H), 7.53 (d, *J* = 8.64 Hz, 2H) ppm; **<sup>13</sup>C NMR (100 MHz, CDCl<sub>3</sub>):** δ 24.1, 39.8 (q, *J* = 26.88 Hz), 50.1, 86.3 (d, *J* = 2.14 Hz), 123.1, 123.4, 126.2, 127.8, 131.8, 138.3, 170.0 ppm; **<sup>19</sup>F NMR (282 MHz, CDCl<sub>3</sub>):** δ -61.66 (t, <sup>3</sup>J<sub>HF</sub> = 10.46 Hz, 3F) ppm; **HRMS (ESI, m/z):** calcd for C<sub>12</sub>H<sub>13</sub>NO<sub>2</sub>F<sub>3</sub>NaBr [M+Na]<sup>+</sup> 361.9979, found: 361.9986.

***N*-(3,3,3-trifluoro-1-methoxy-1-(naphthalen-2-yl)propyl)acetamide:**

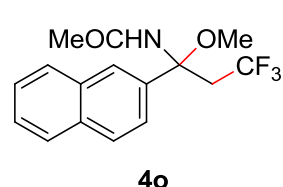

**<sup>1</sup>H NMR (400 MHz, CDCl<sub>3</sub>):** δ 2.10 (s, 3H), 3.13 (s, 3H), 3.40-3.64 (m, 2H), 6.31 (s, 1H), 7.50-7.54 (m, 3H), 7.84-7.89 (m, 4H) ppm; **<sup>13</sup>C NMR (100 MHz, CDCl<sub>3</sub>):** δ 24.2,

39.9 (q,  $J = 26.96$  Hz), 50.1, 86.7 (d,  $J = 2.71$  Hz), 123.2, 125.5, 126.6, 126.9, 127.6, 128.4, 128.8, 132.8, 133.2, 136.4, 170.0 ppm;  **$^{19}\text{F}$  NMR (282 MHz,  $\text{CDCl}_3$ ):**  $\delta$  -61.69 (t,  $^3J_{\text{HF}} = 10.64$  Hz, 3F) ppm; **HRMS (ESI,  $m/z$ ):** calcd for  $\text{C}_{16}\text{H}_{16}\text{NO}_2\text{F}_3\text{Na}$   $[\text{M}+\text{Na}]^+$  334.1031, found: 334.1045.

***N*-(3,3,3-trifluoro-1-methoxy-1-(thiophen-2-yl)propyl)acetamide:**

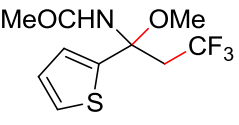  
**4p**  **$^1\text{H}$  NMR (400 MHz,  $\text{CDCl}_3$ ):**  $\delta$  2.06 (s, 3H), 3.15 (s, 3H), 3.39-3.55 (m, 2H), 6.23 (s, 1H), 6.98-7.00 (m, 1H), 7.07 (d,  $J = 3.29$  Hz, 1H), 7.35 (d,  $J = 5.05$  Hz, 1H) ppm;  **$^{13}\text{C}$  NMR (100 MHz,  $\text{CDCl}_3$ ):**  $\delta$  24.0, 39.7 (q,  $J = 26.89$  Hz), 50.1, 85.1 (d,  $J = 3.08$  Hz), 123.4, 126.0, 126.1, 126.6, 126.8, 128.9, 143.9, 169.8 ppm;  **$^{19}\text{F}$  NMR (282 MHz,  $\text{CDCl}_3$ ):**  $\delta$  -62.36 (t,  $^3J_{\text{HF}} = 10.35$  Hz, 3F) ppm; **HRMS (ESI,  $m/z$ ):** calcd for  $\text{C}_{10}\text{H}_{12}\text{NO}_2\text{F}_3\text{NaS}$   $[\text{M}+\text{Na}]^+$  290.0439, found: 290.0439.

***N*-(1,1,1-trifluoro-3-methoxy-5-phenylpentan-3-yl)acetamide:**

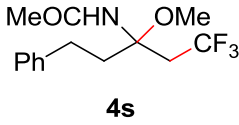  
**4s**  **$^1\text{H}$  NMR (400 MHz,  $\text{CDCl}_3$ ):**  $\delta$  1.95 (s, 3H), 2.02-2.11 (m, 1H), 2.28-2.36 (m, 1H), 2.63 (t,  $J = 8.40$  Hz, 2H), 2.88-3.00 (m, 1H), 3.12-3.21 (m, 1H), 3.28 (s, 3H), 5.60 (s, 1H), 7.17-7.22 (m, 3H), 7.27-7.31 (m, 3H) ppm;  **$^{13}\text{C}$  NMR (100 MHz,  $\text{CDCl}_3$ ):**  $\delta$  24.0, 28.7, 35.8, 35.9 (q,  $J = 26.65$  Hz), 48.8, 85.9 (d,  $J = 2.35$  Hz), 123.8, 126.2, 126.5, 128.3, 128.6, 140.8, 169.7 ppm;  **$^{19}\text{F}$  NMR (282 MHz,  $\text{CDCl}_3$ ):**  $\delta$  -62.38 (t,  $^3J_{\text{HF}} = 11.00$  Hz, 3F) ppm; **HRMS (ESI,  $m/z$ ):** calcd for  $\text{C}_{14}\text{H}_{18}\text{NO}_2\text{F}_3\text{Na}$   $[\text{M}+\text{Na}]^+$  312.1187, found: 312.1187.



# <sup>1</sup>H and <sup>13</sup>C NMR spectra of products

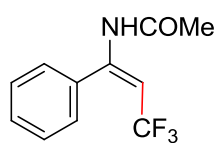

**3a**

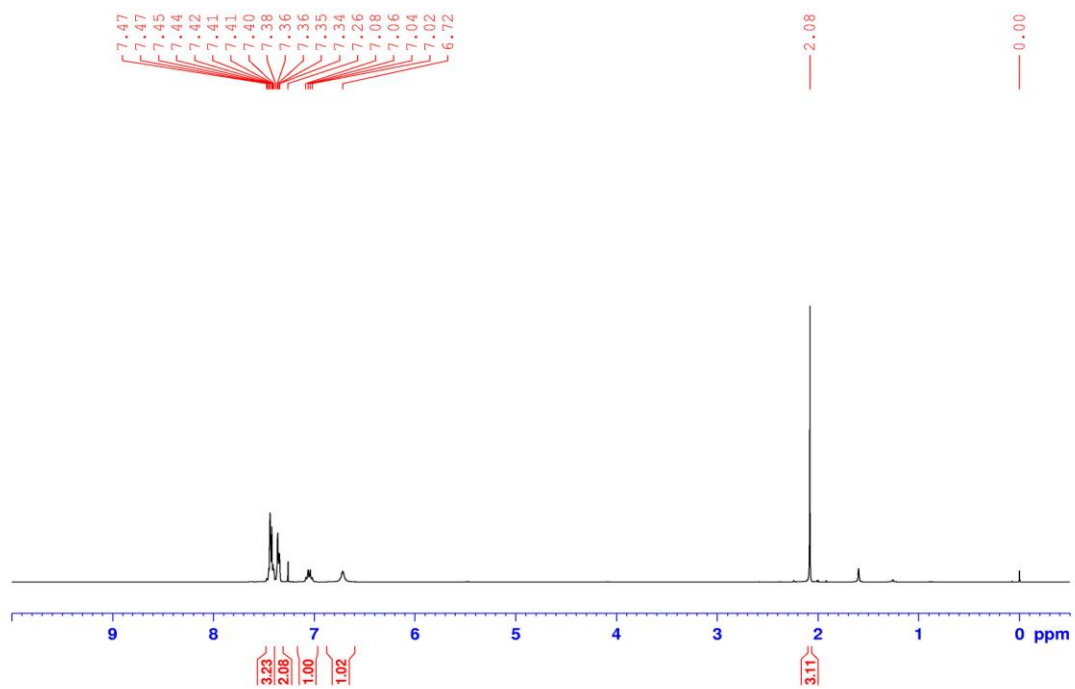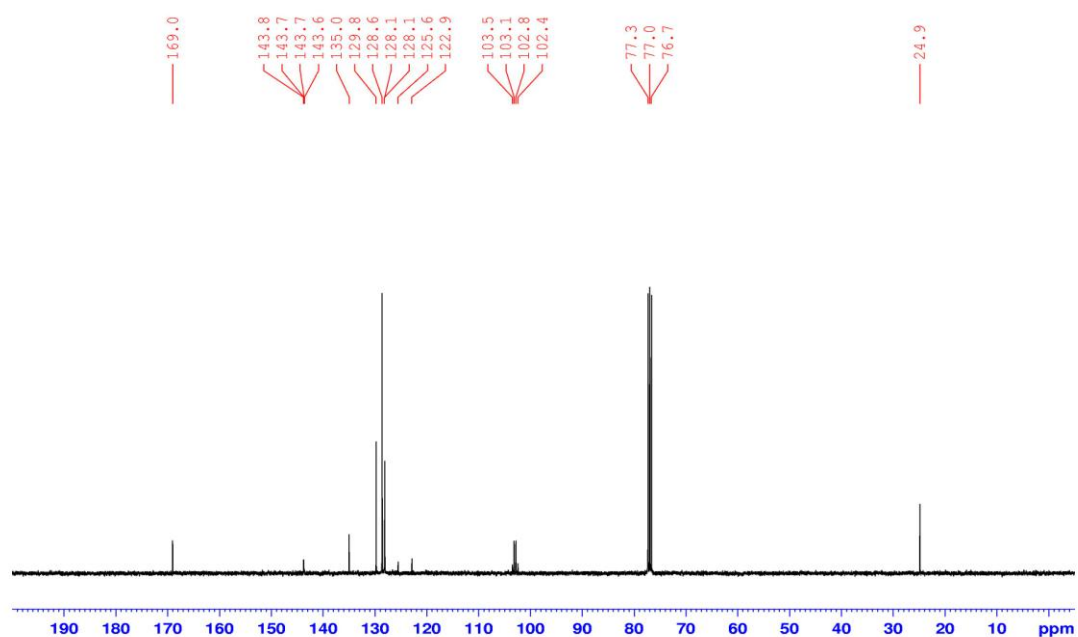

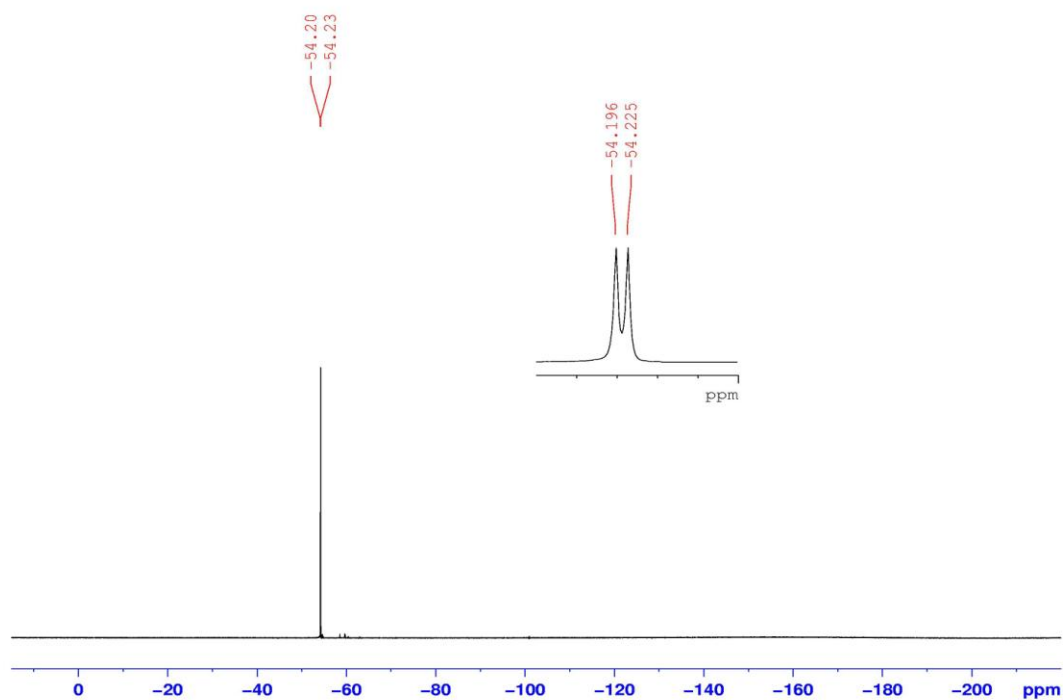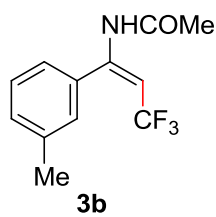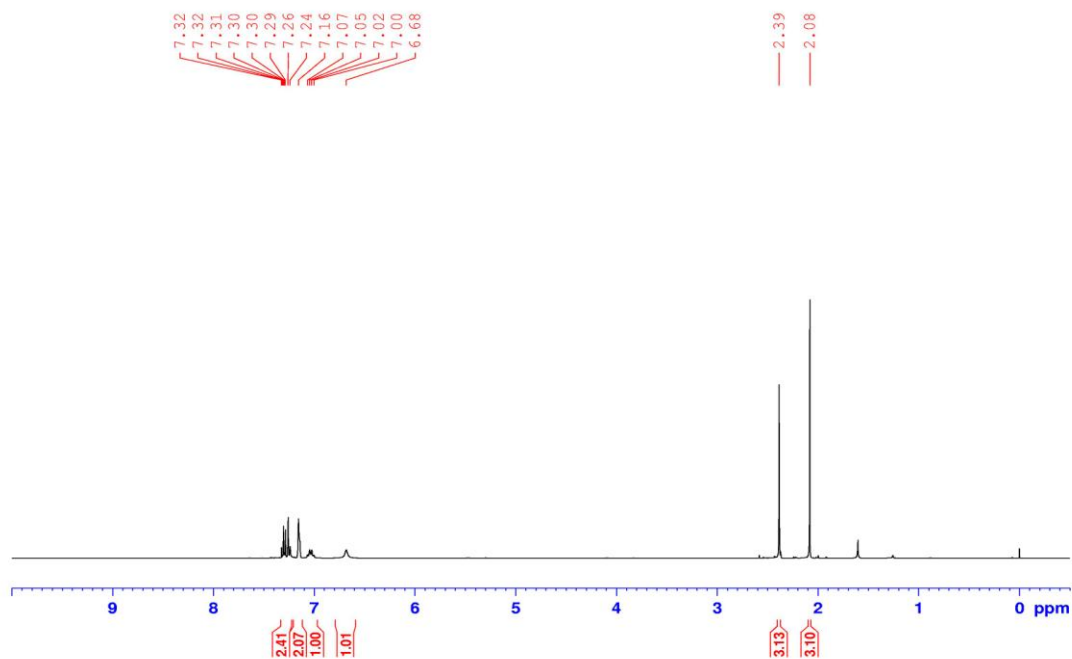

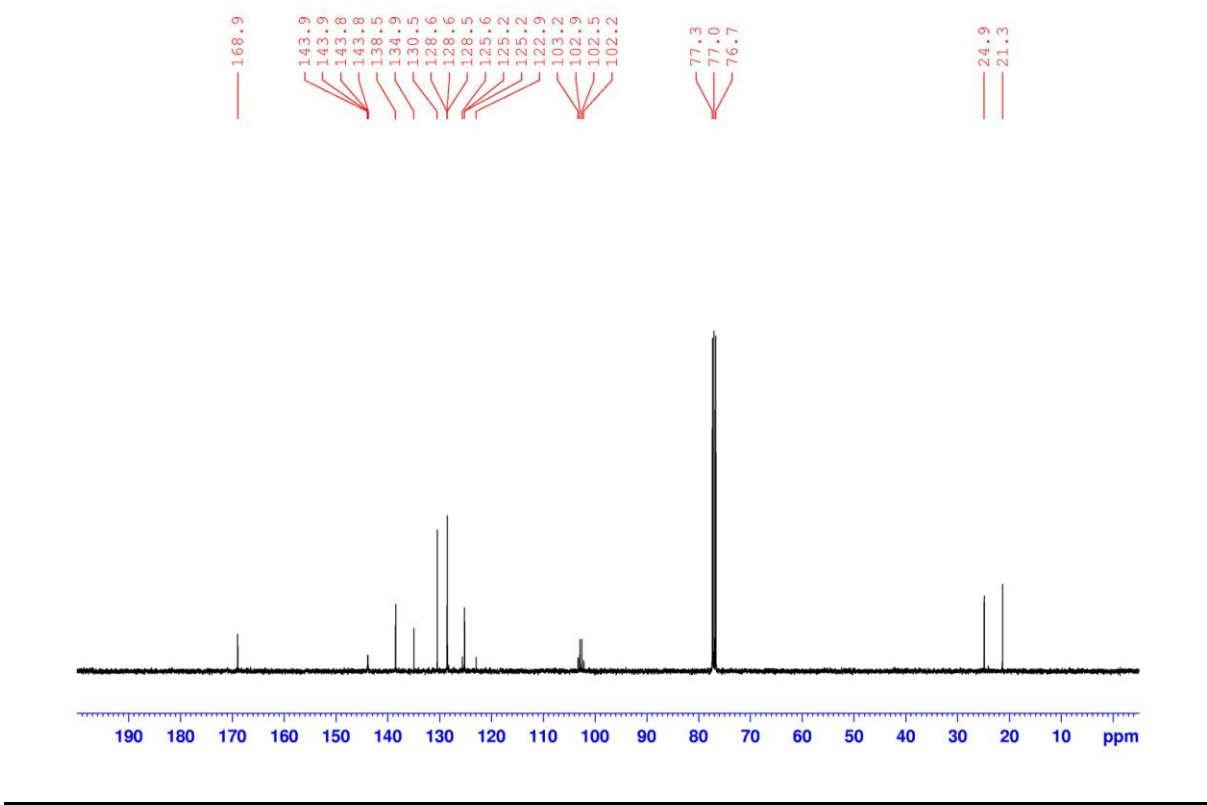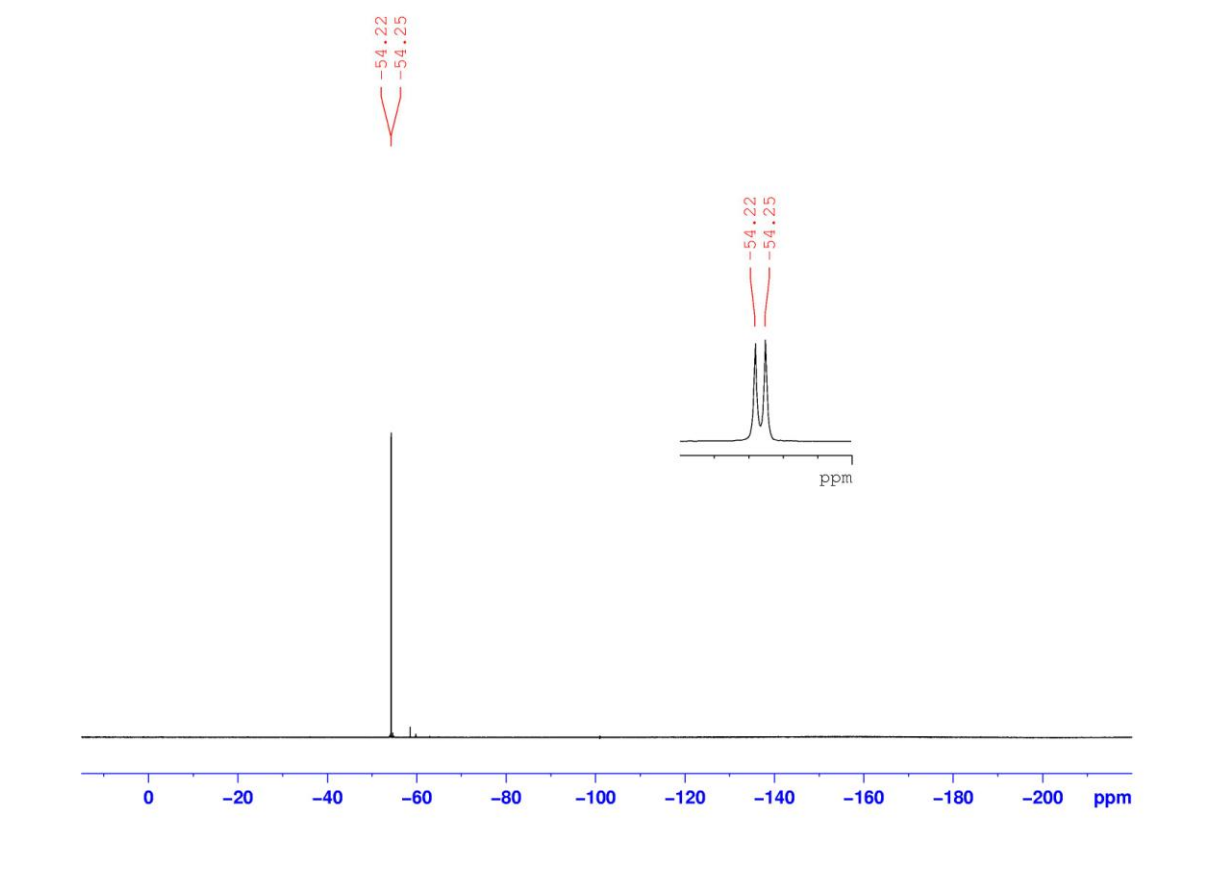

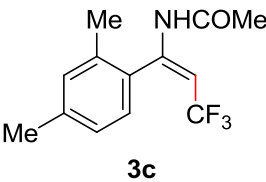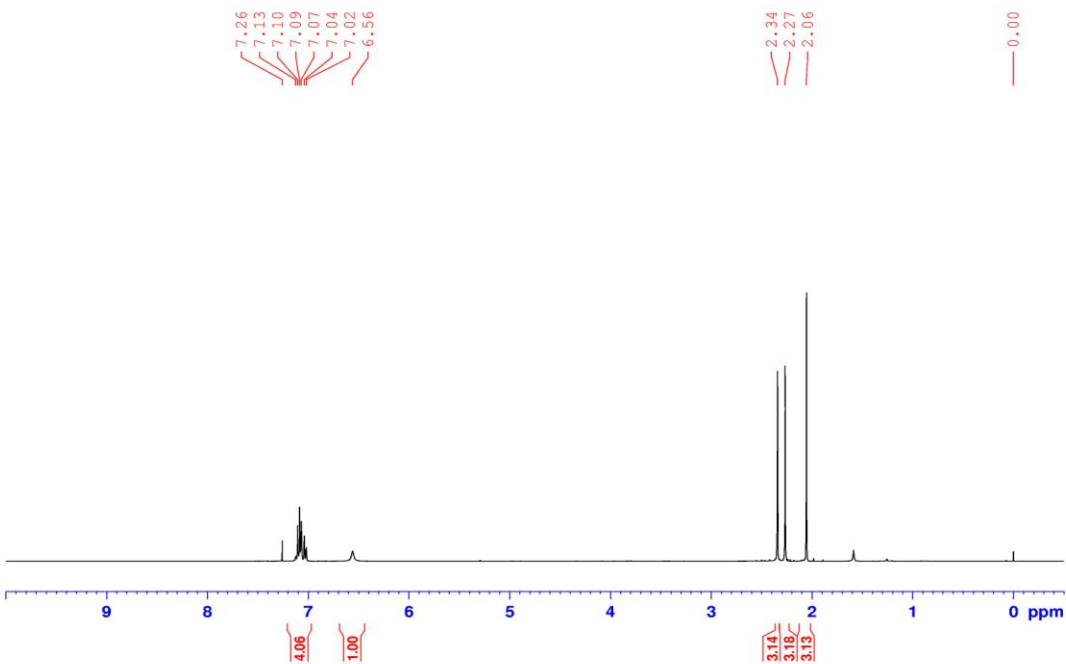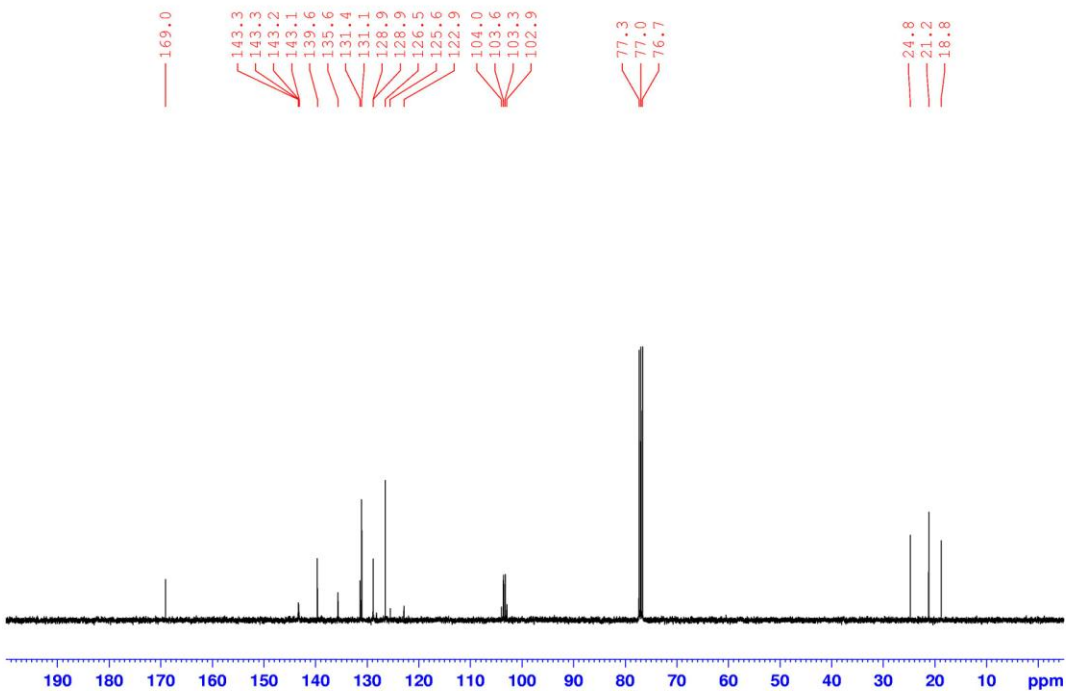

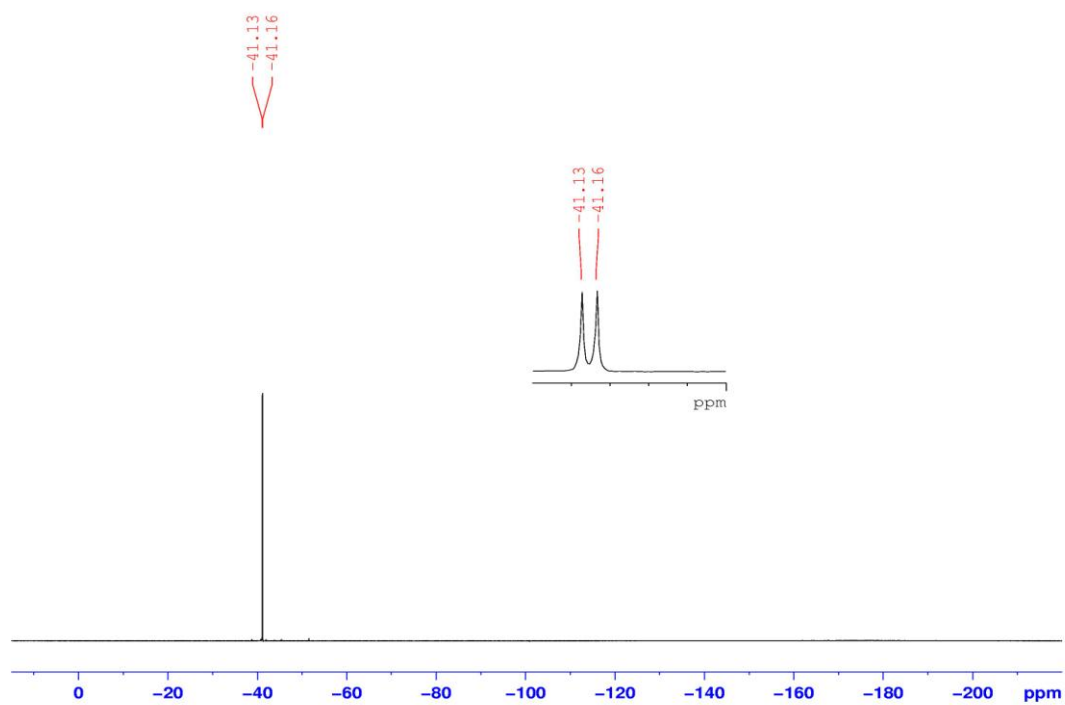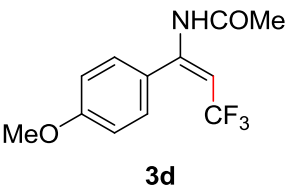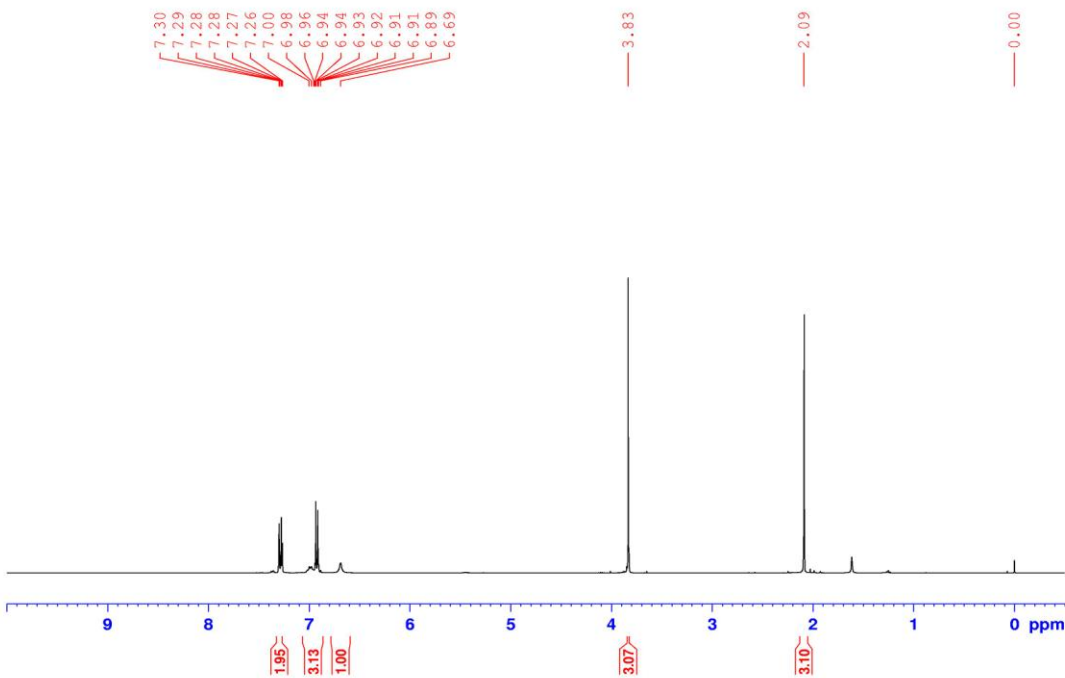

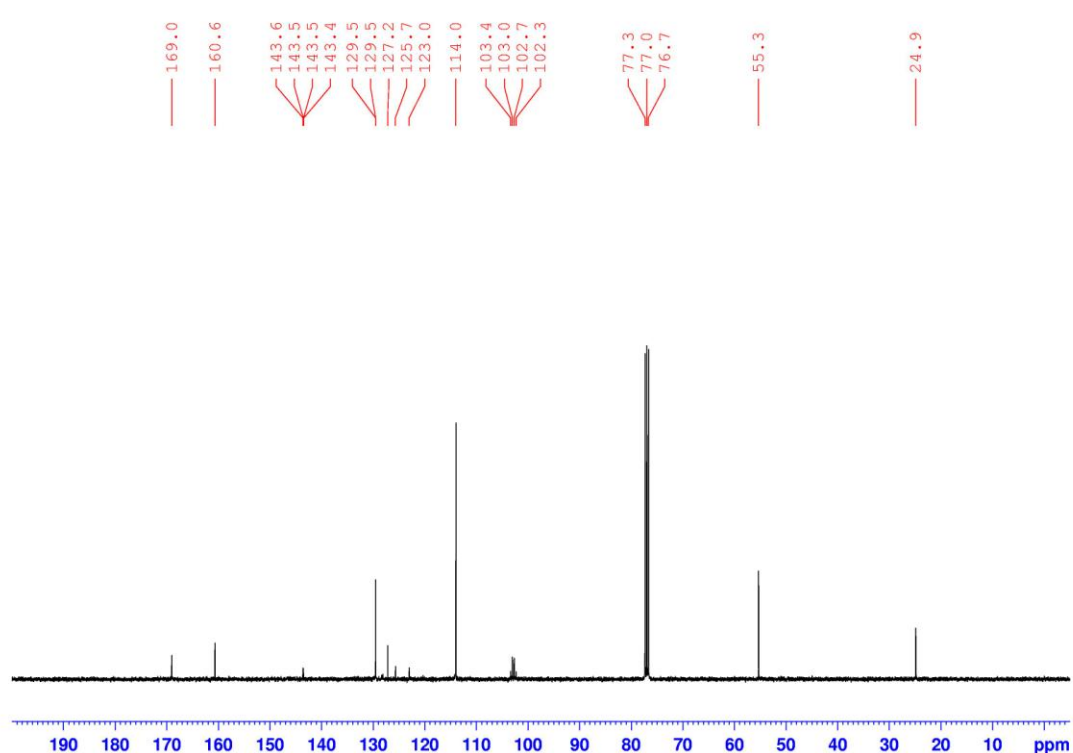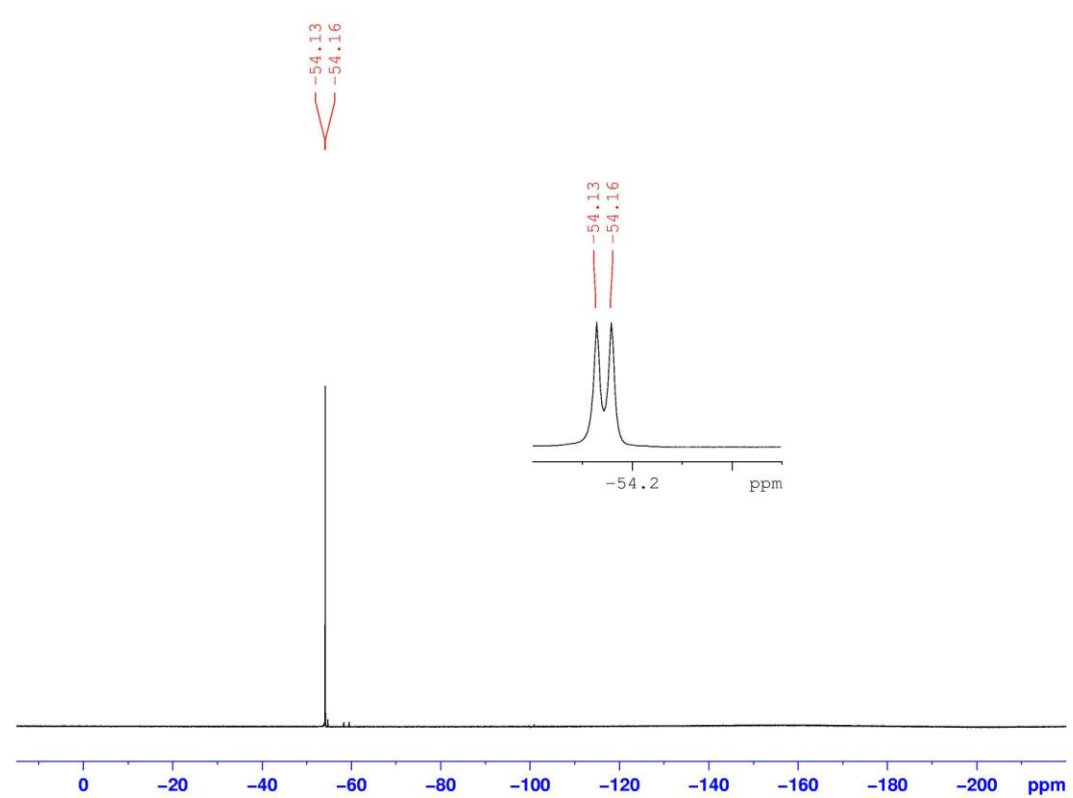

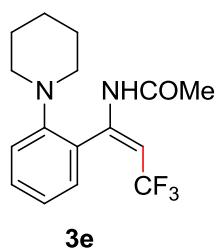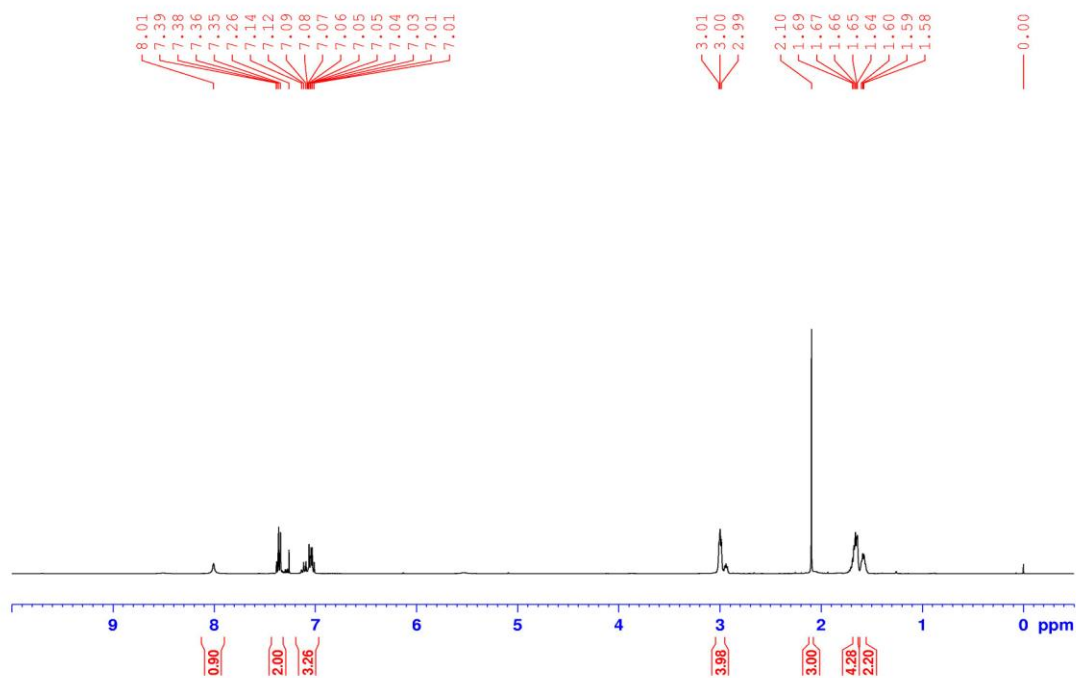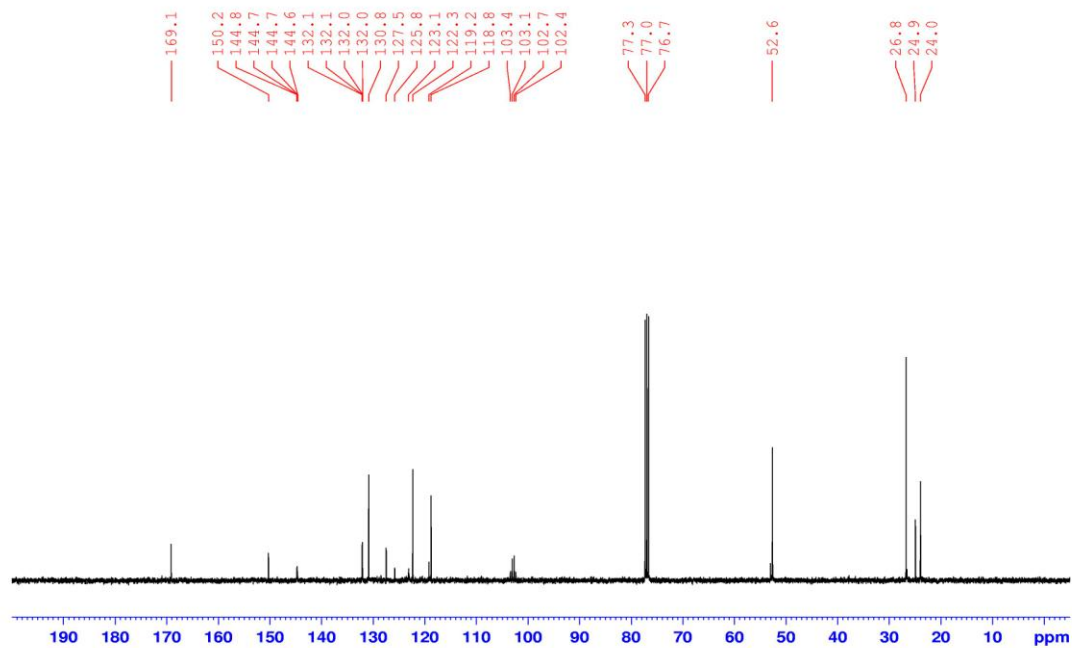

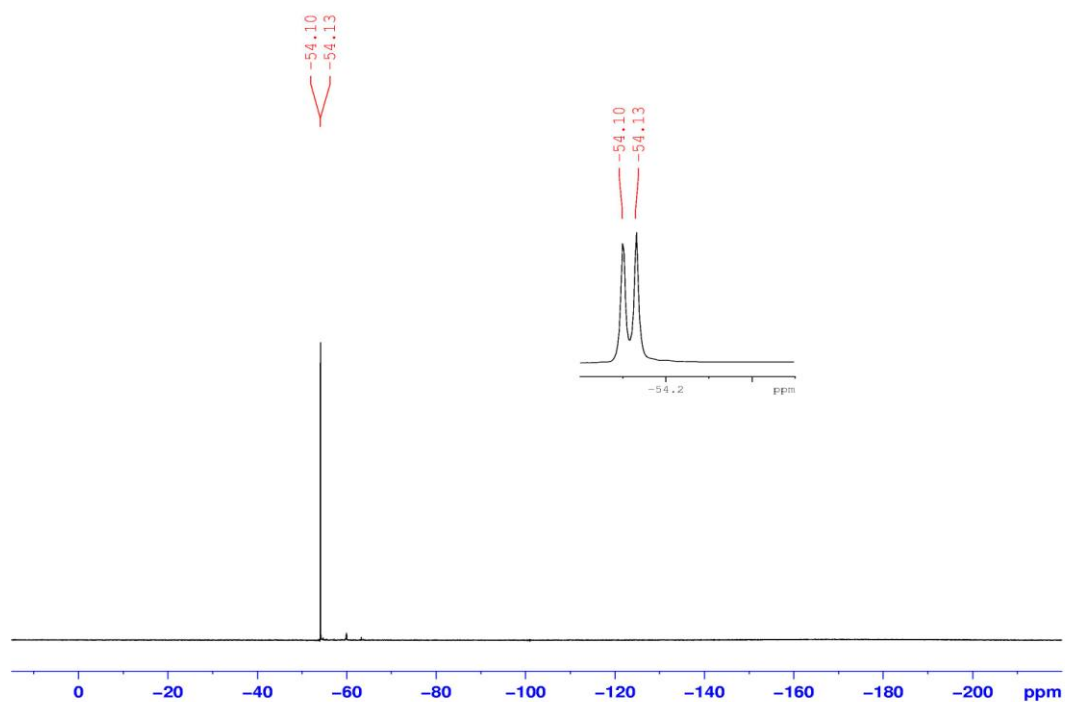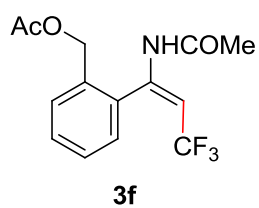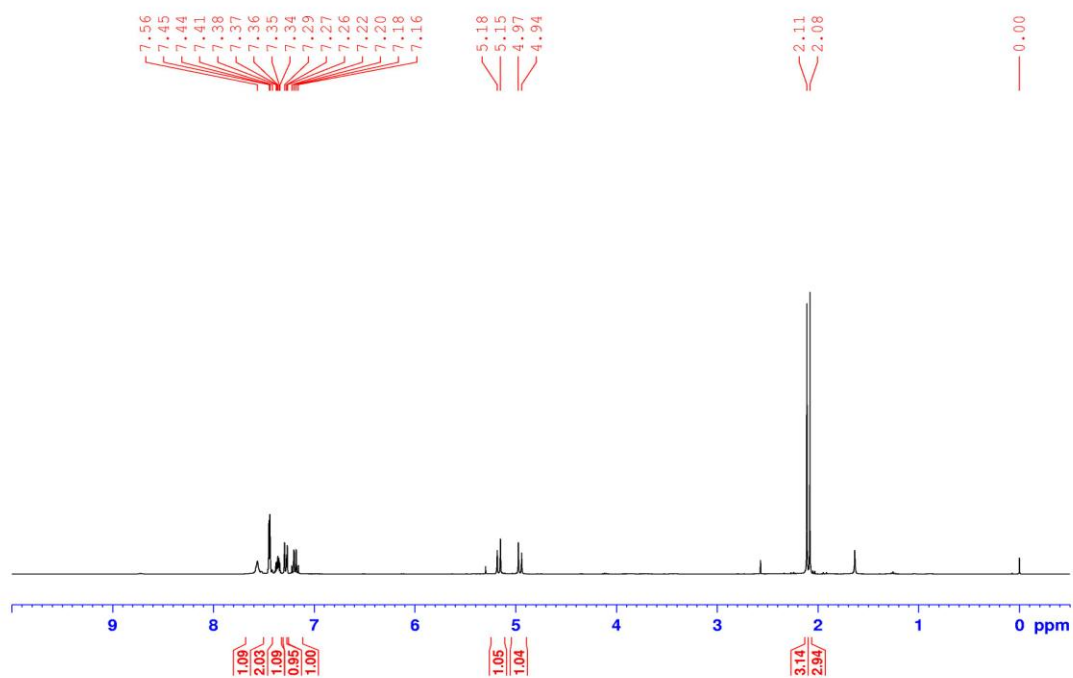



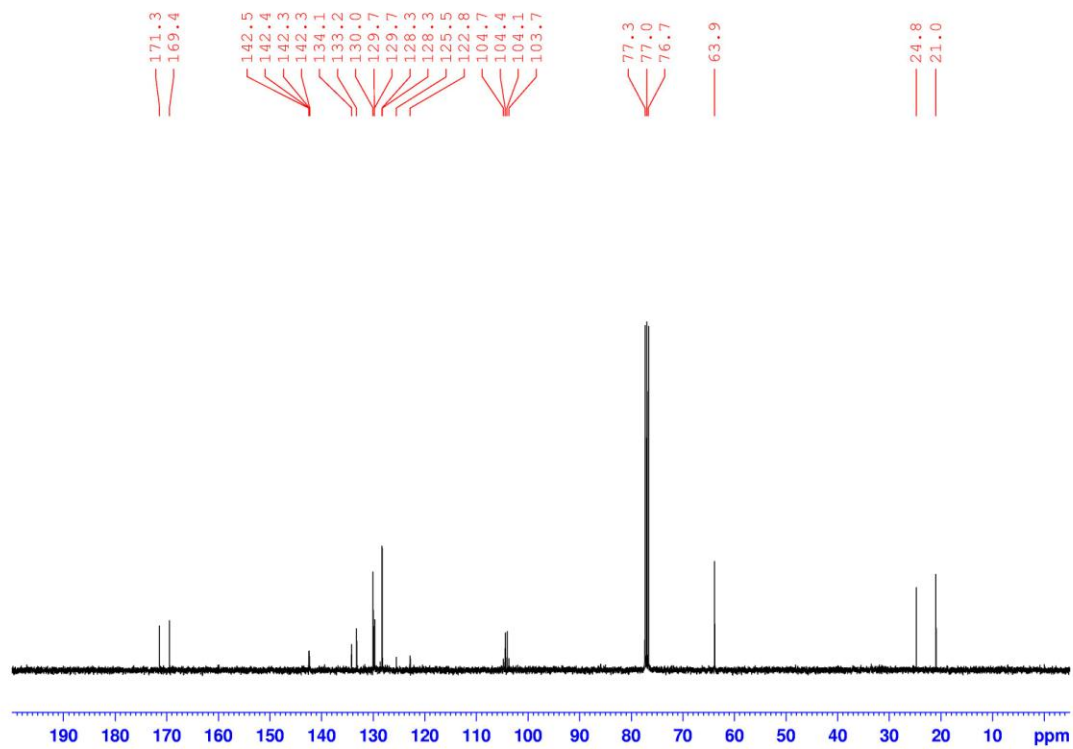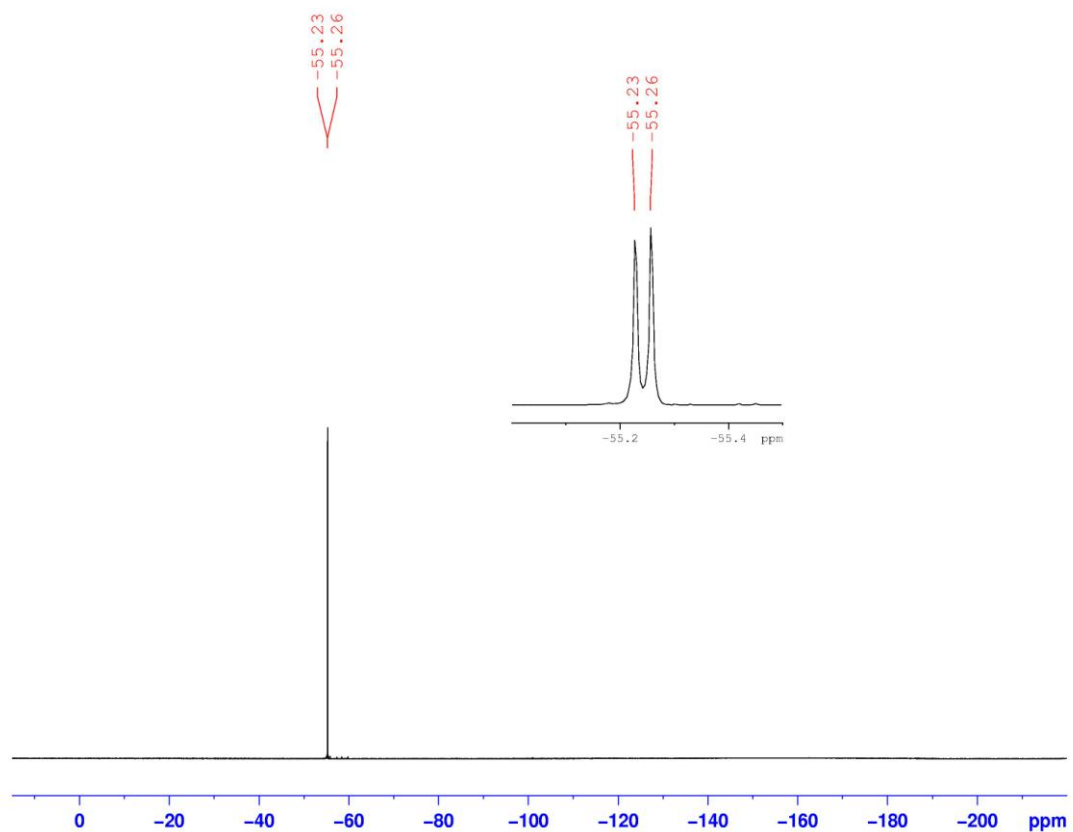

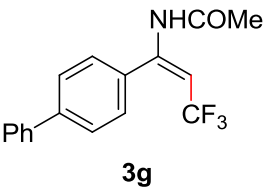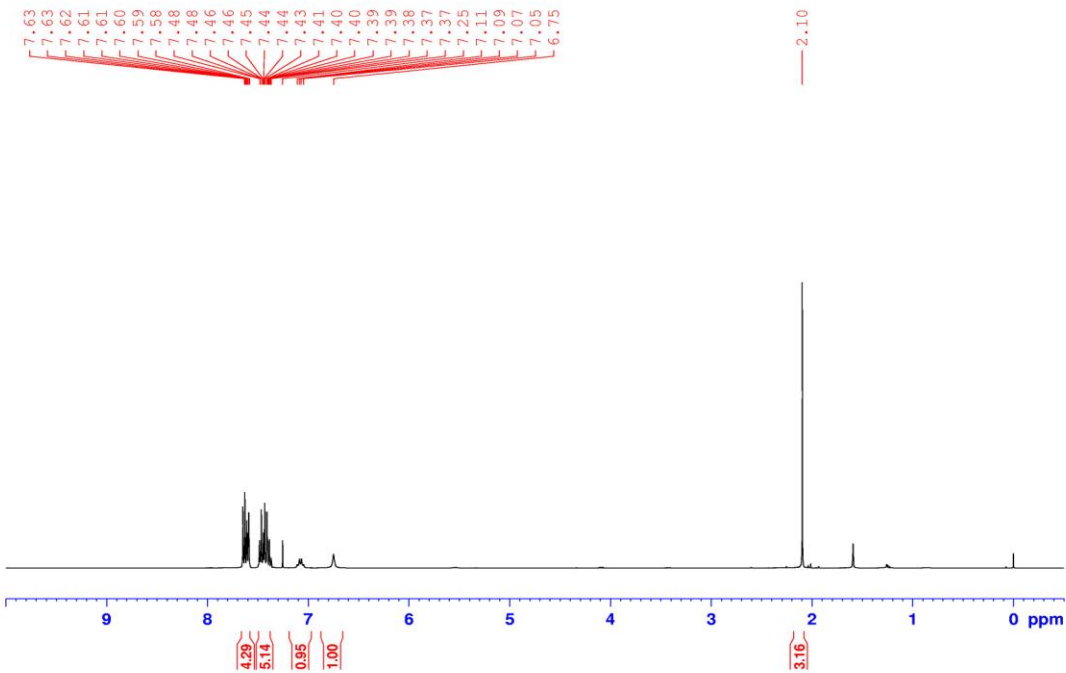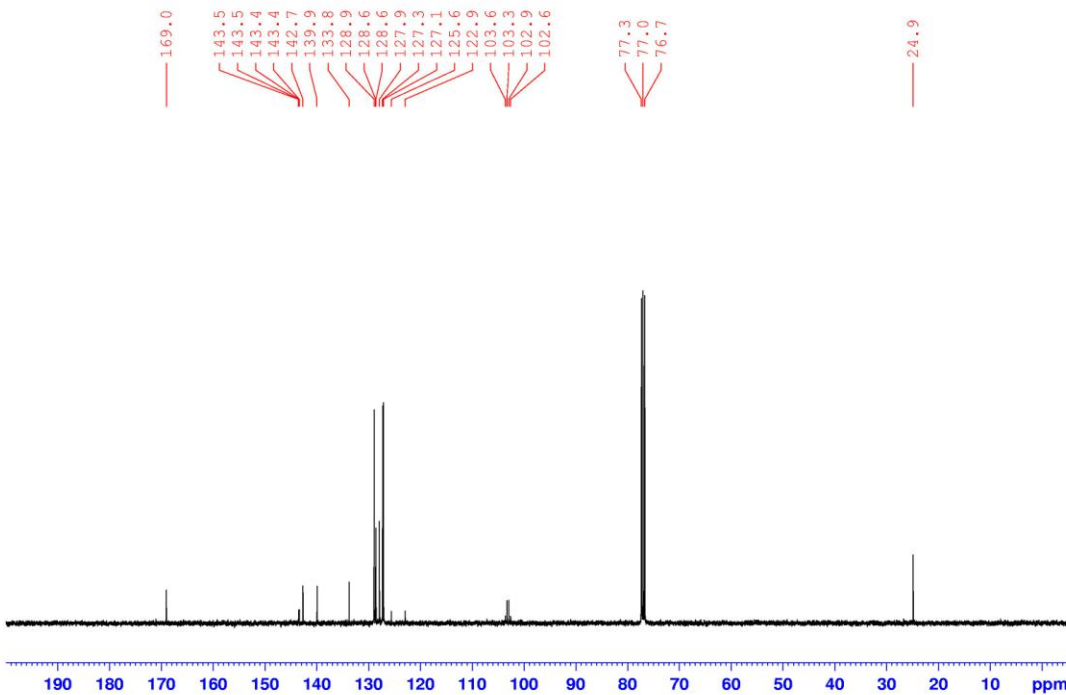

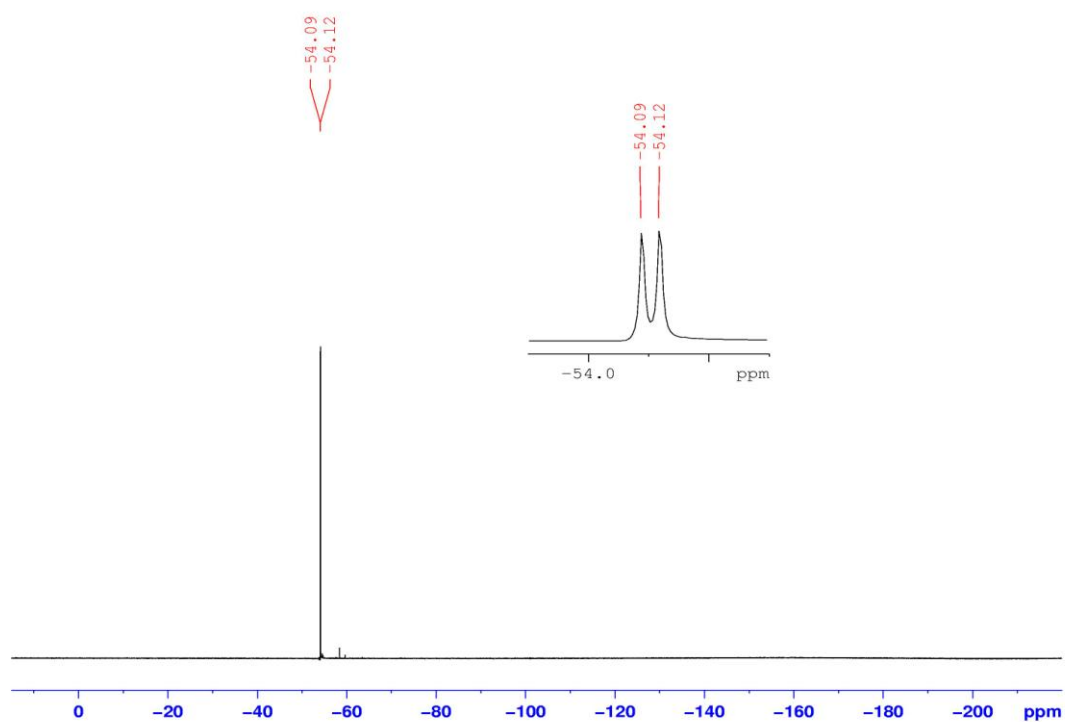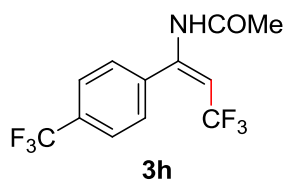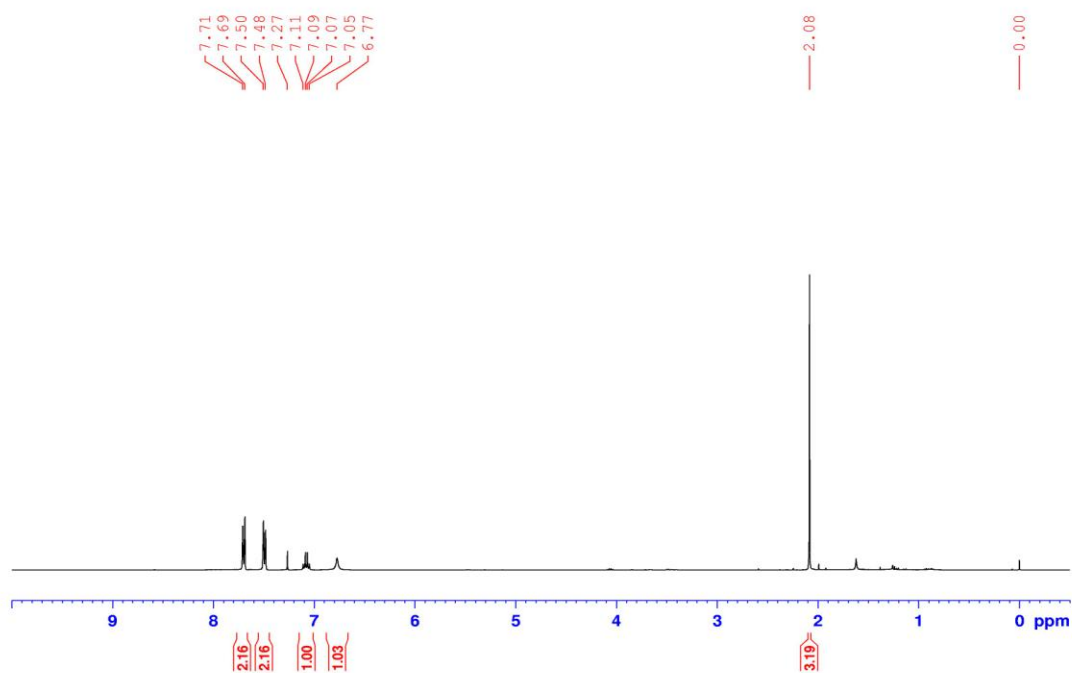

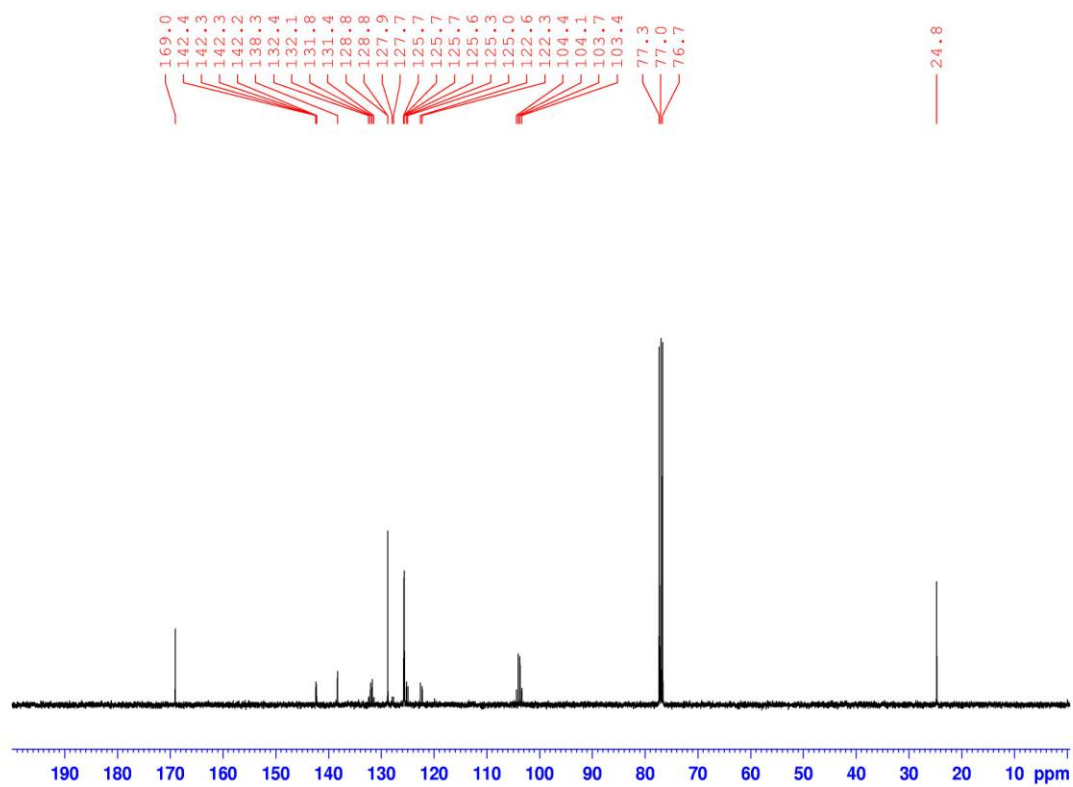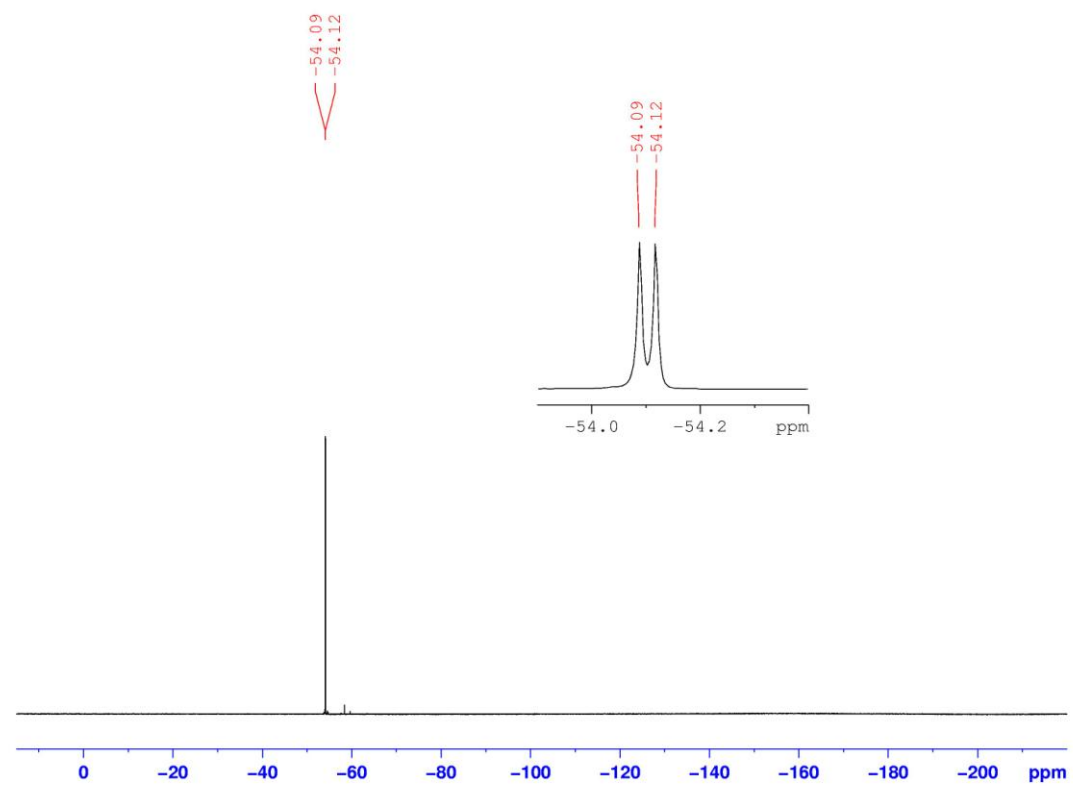

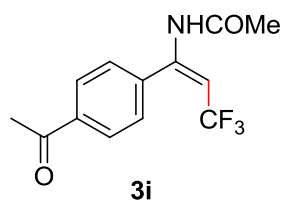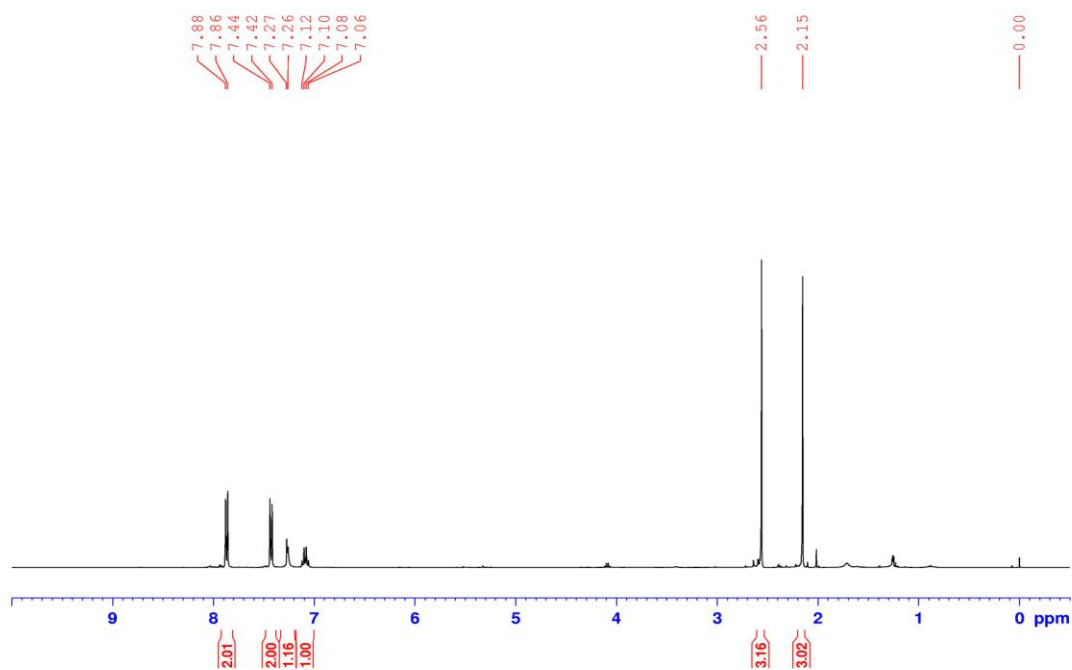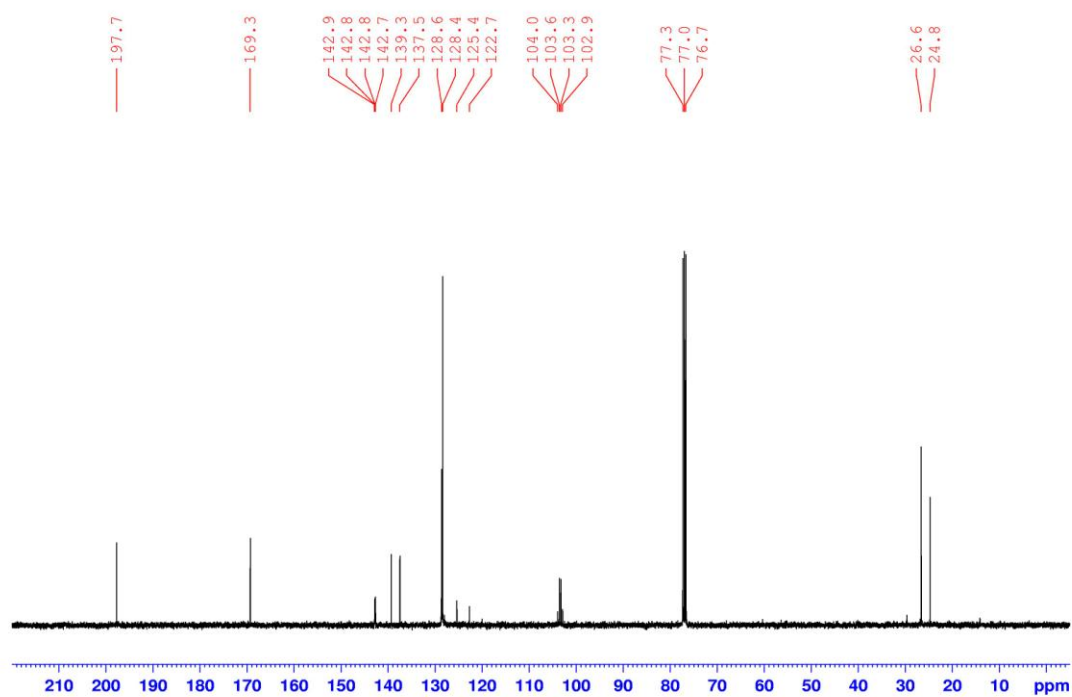

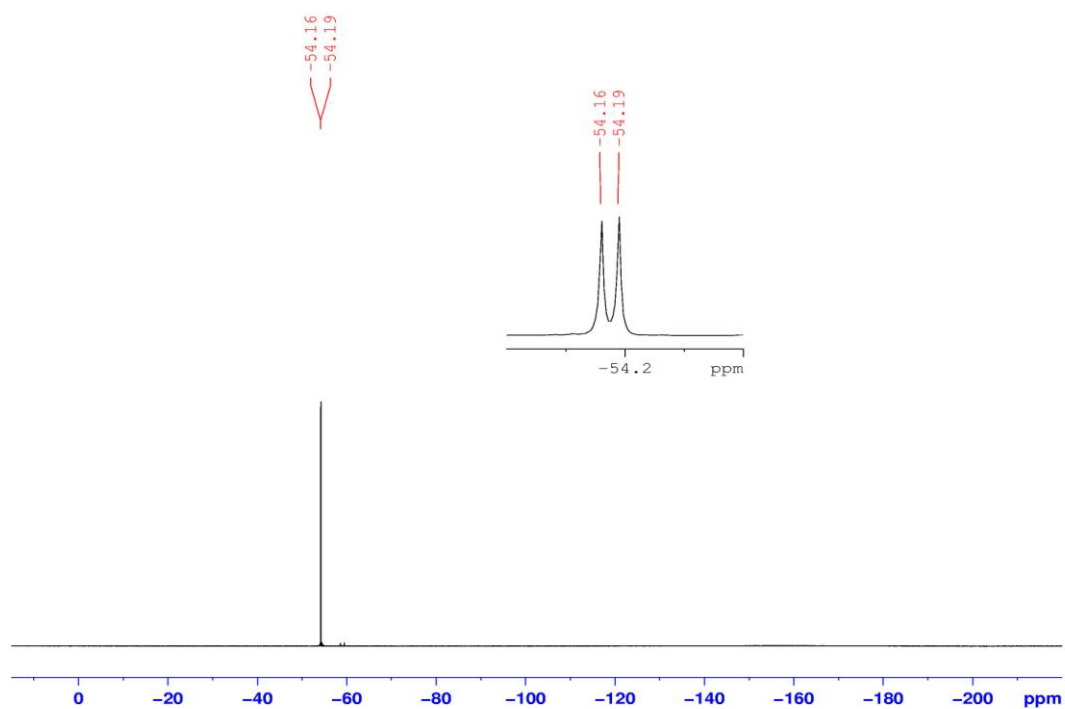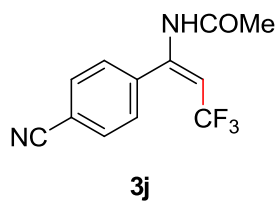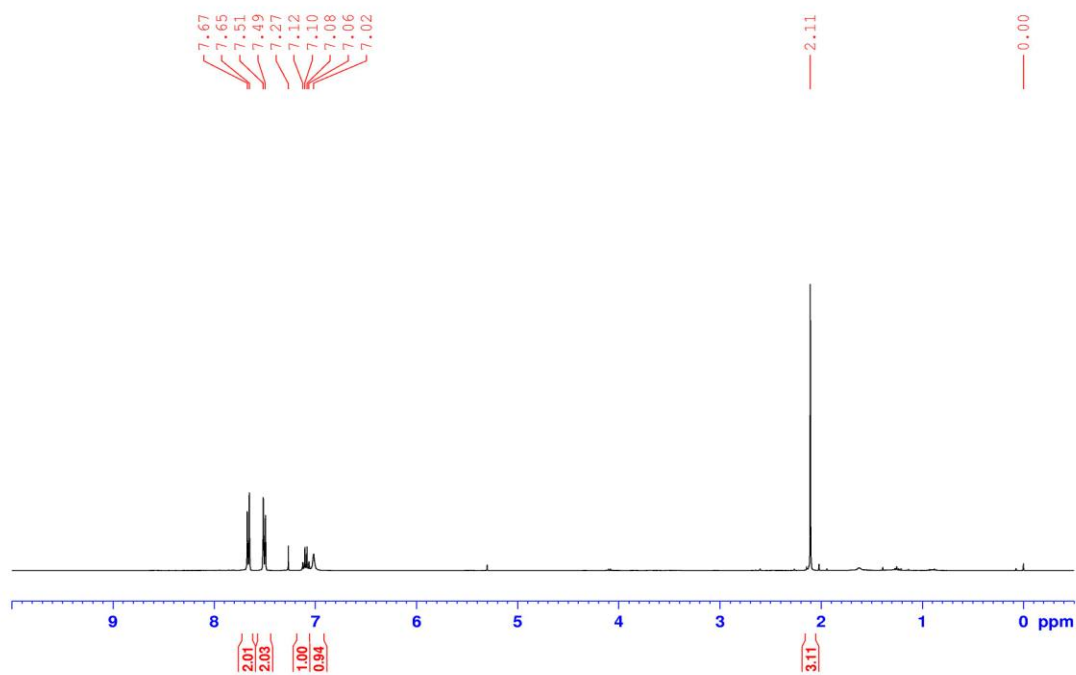

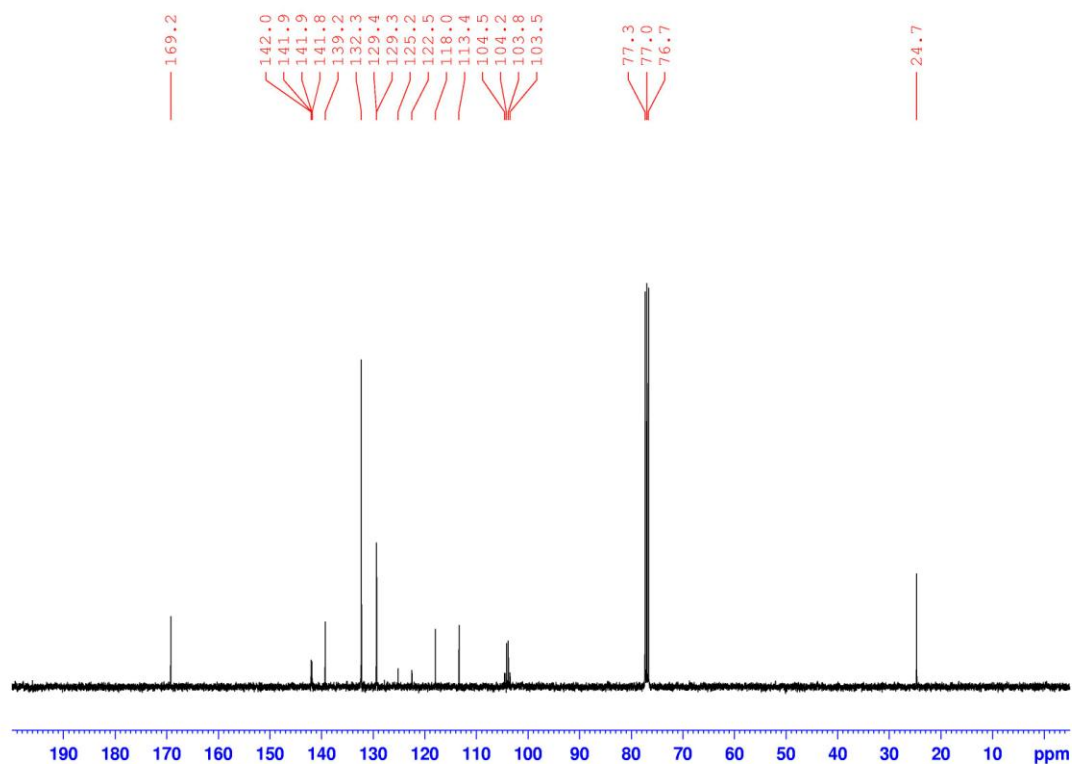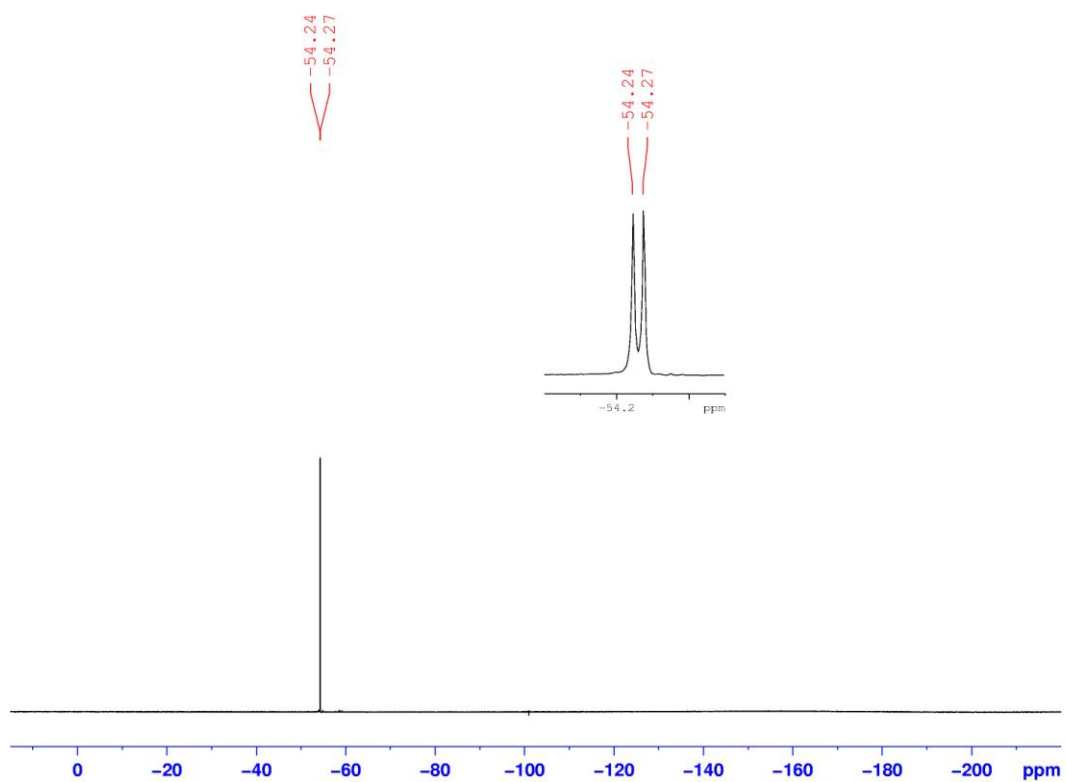

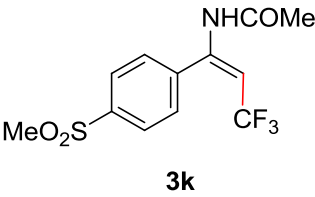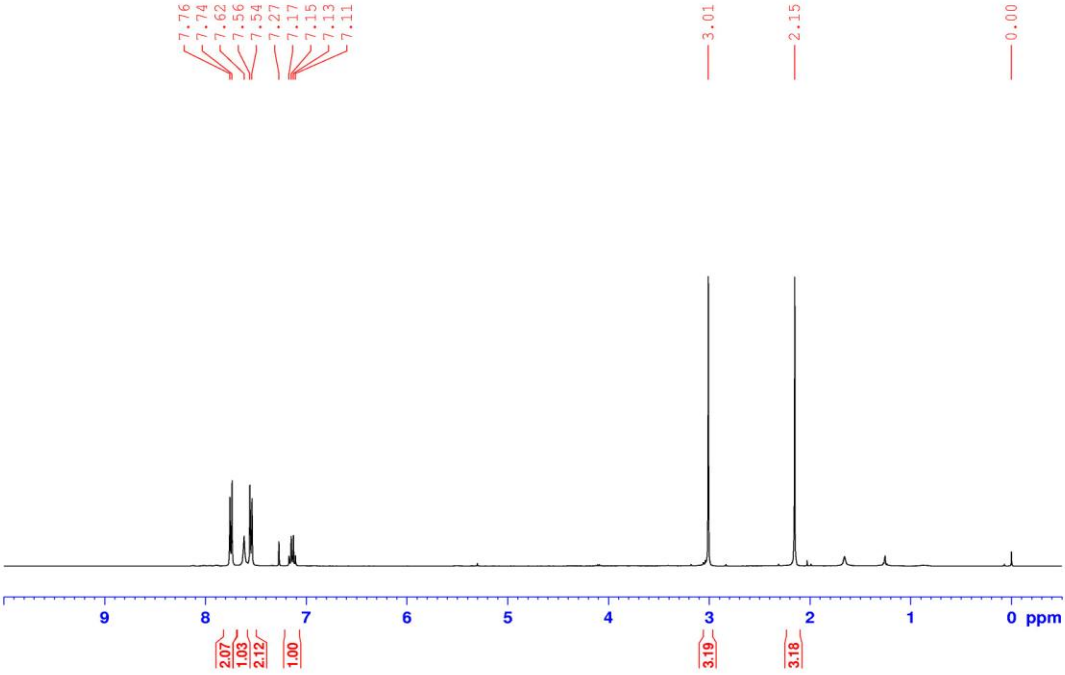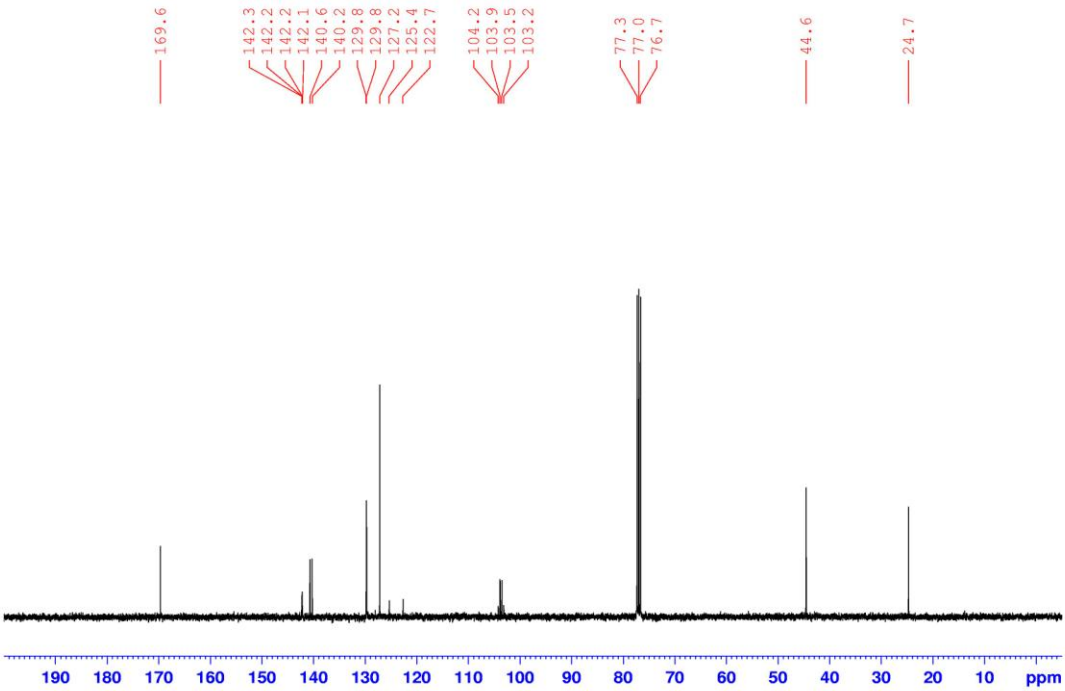



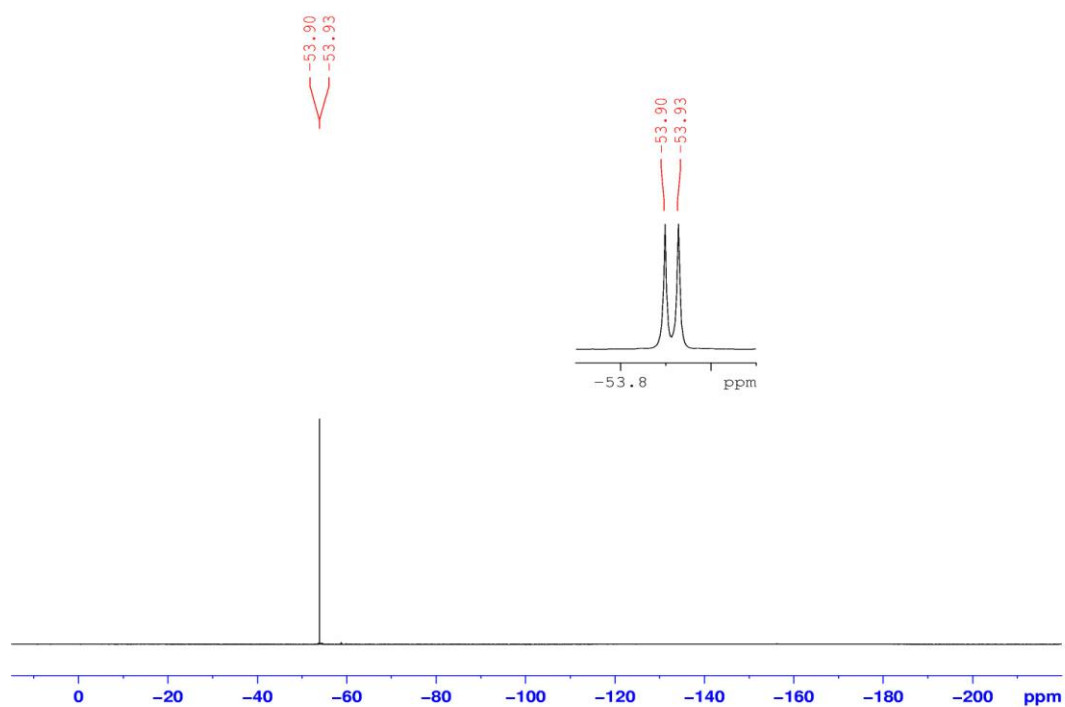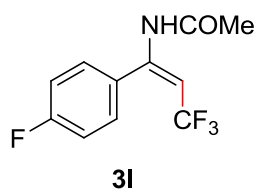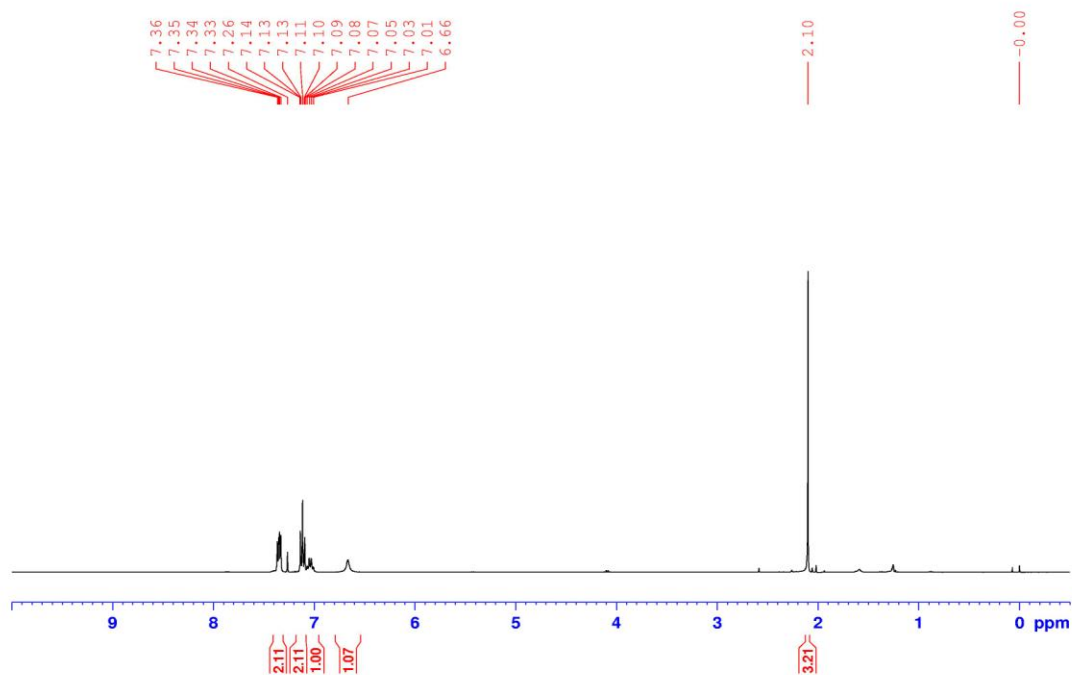

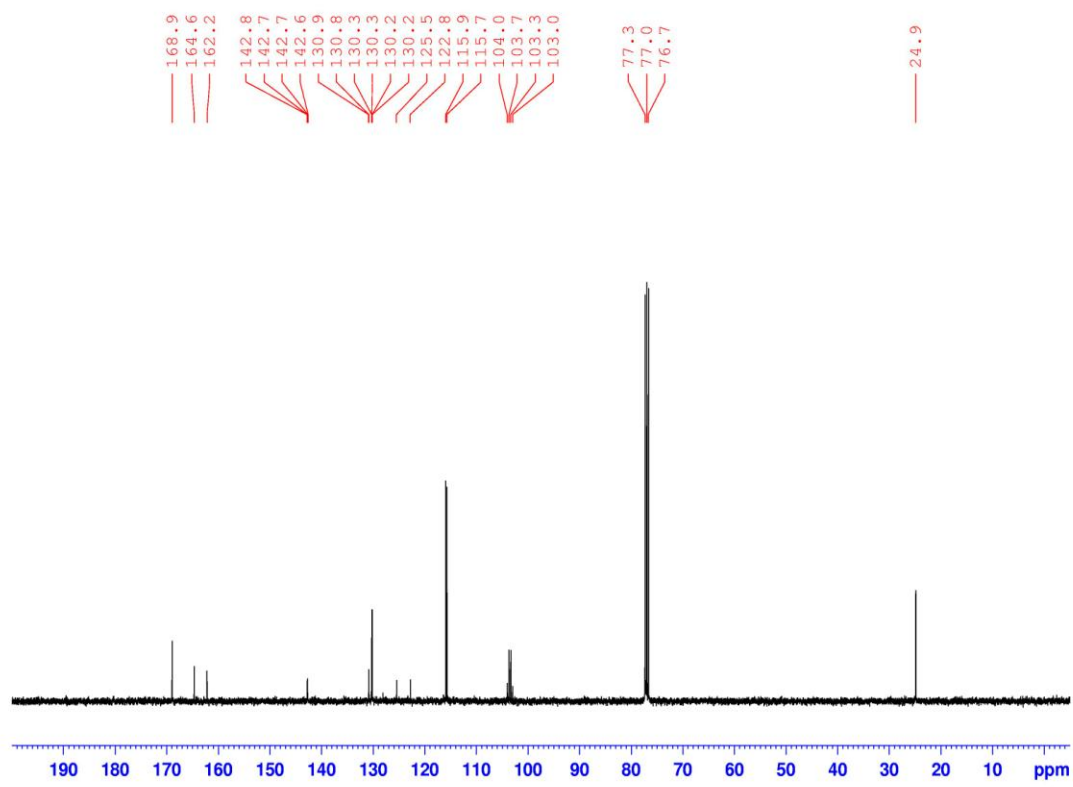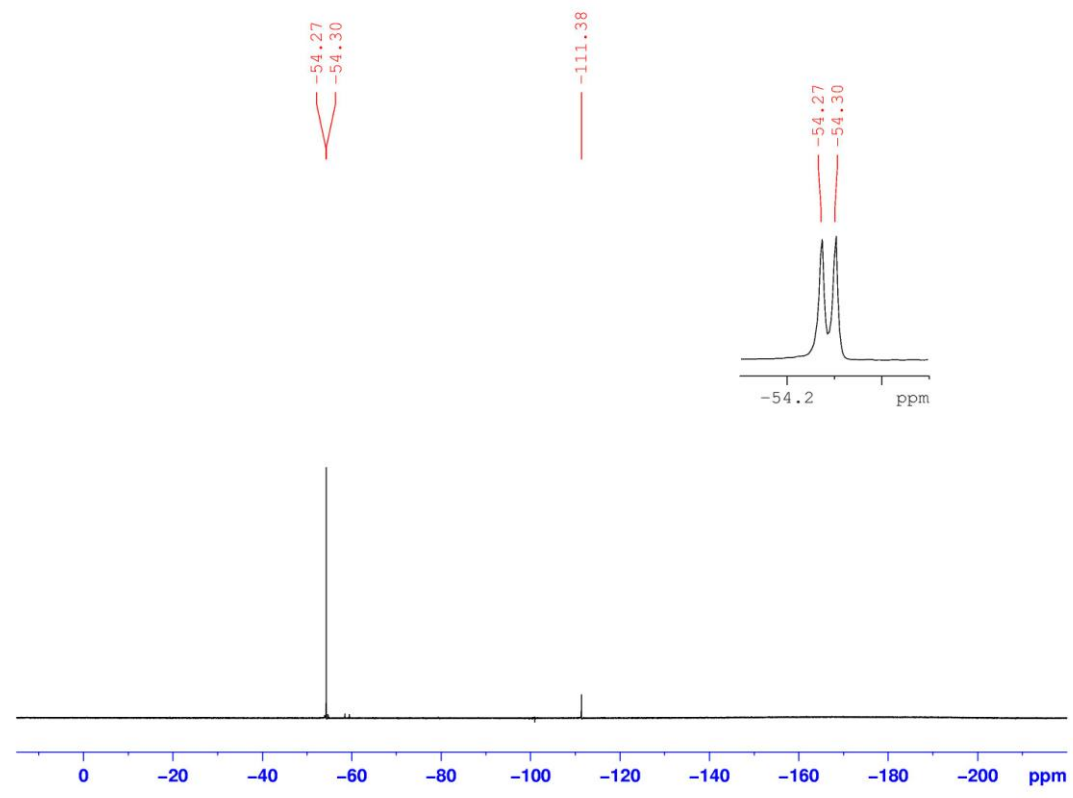

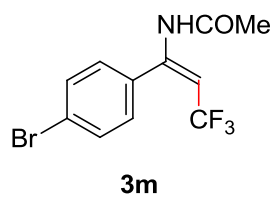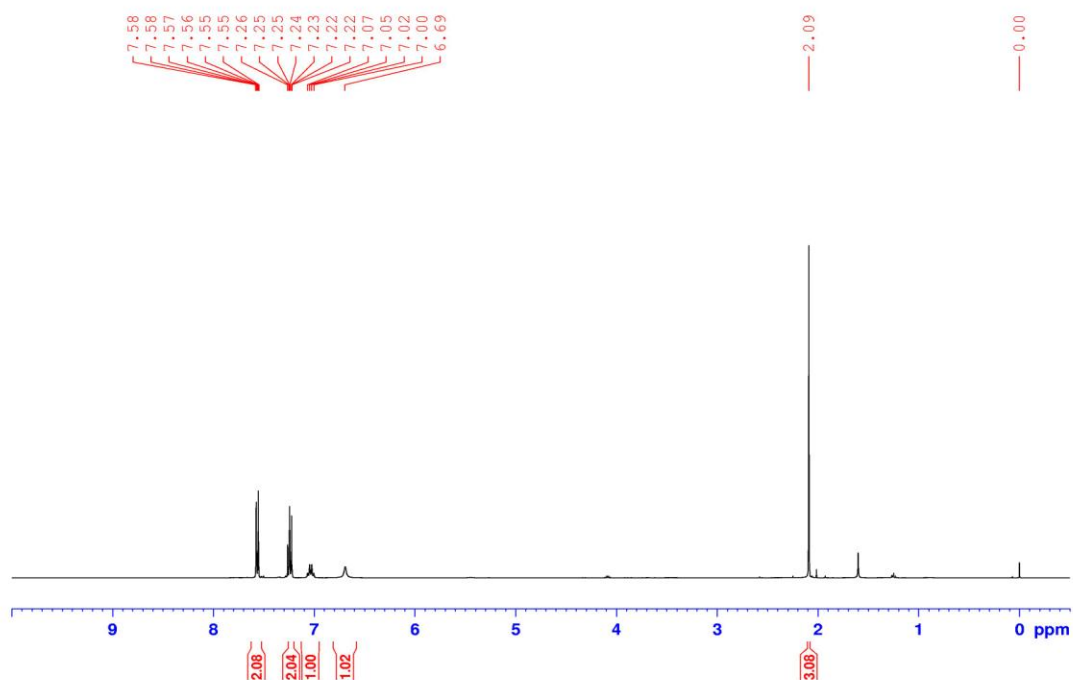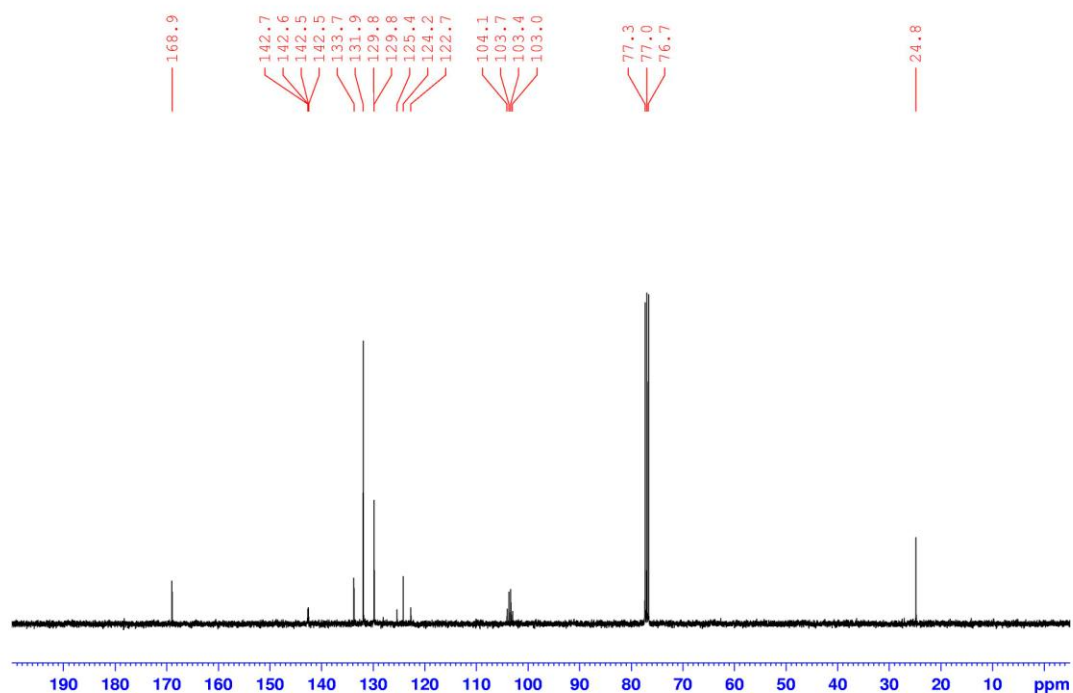

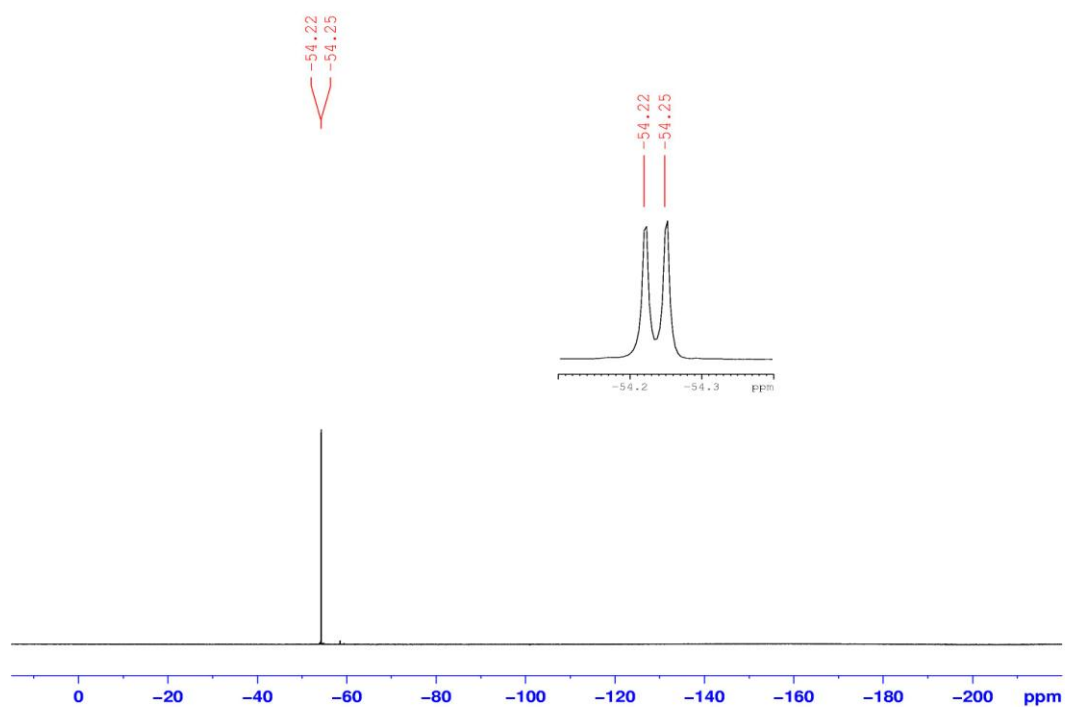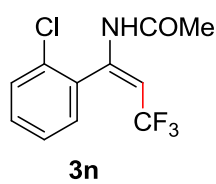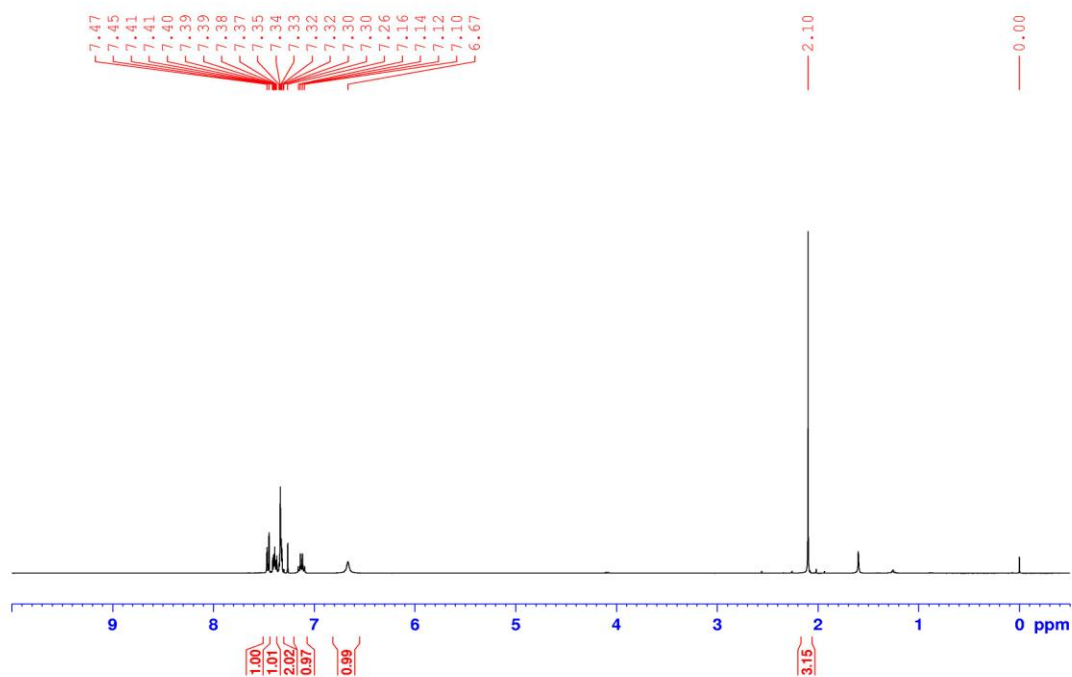

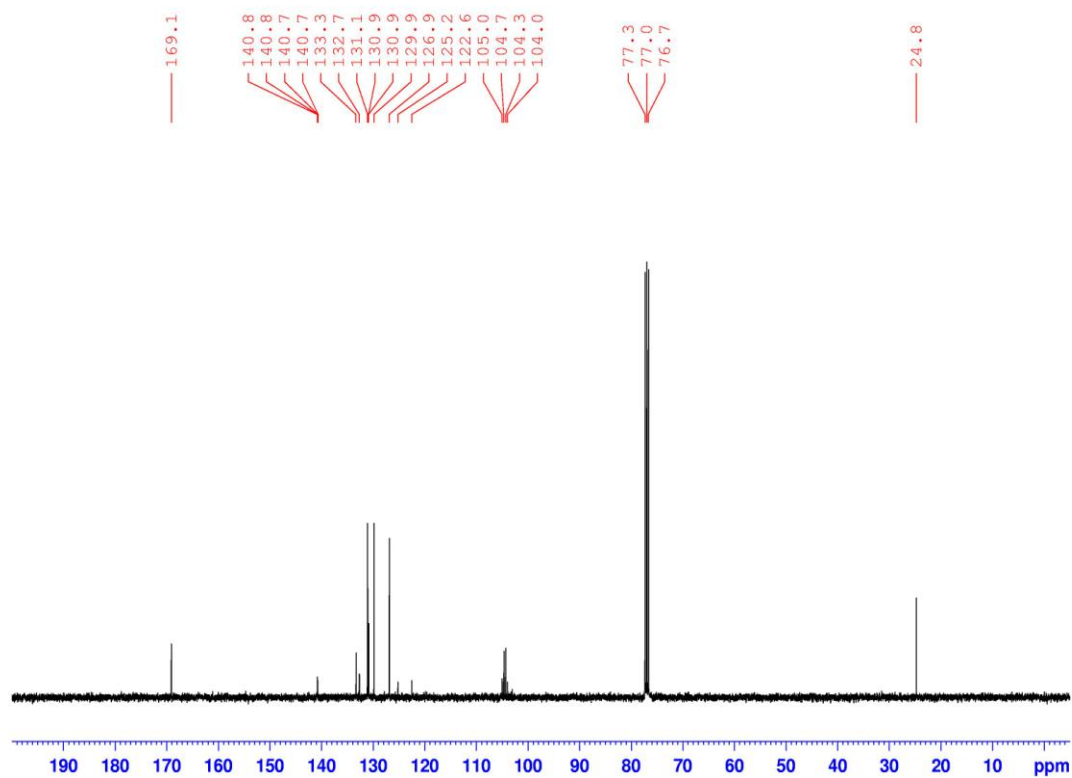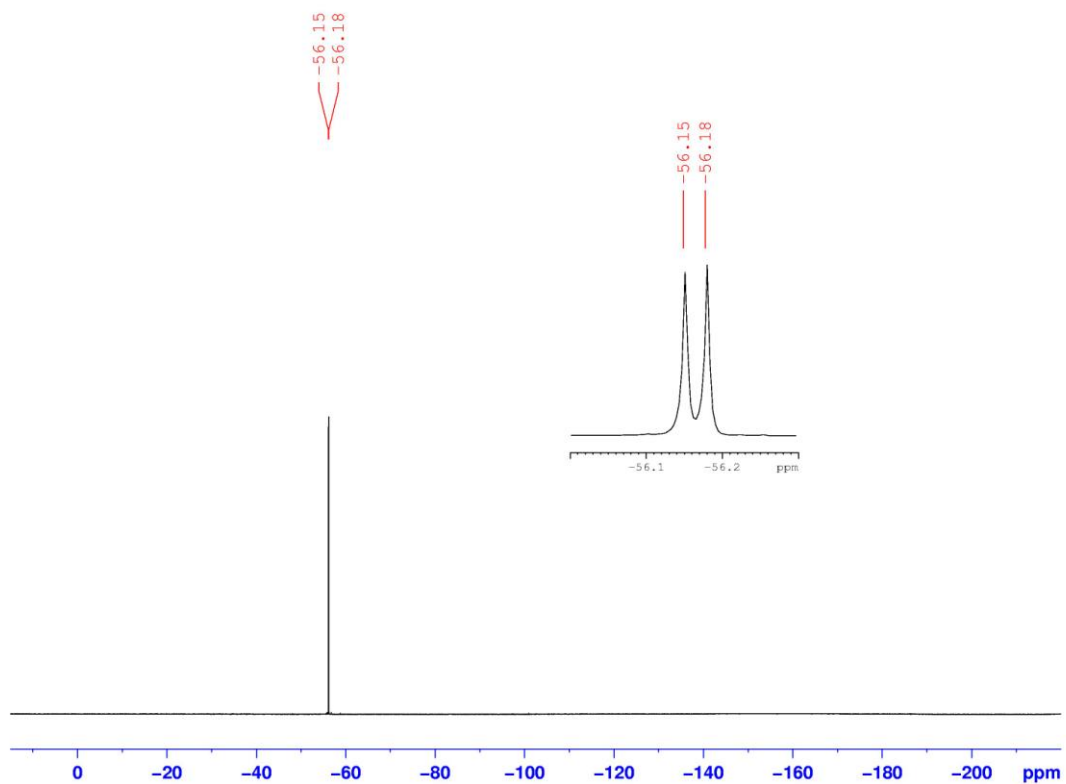

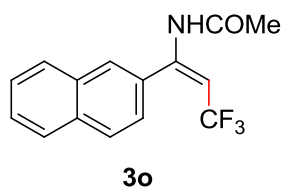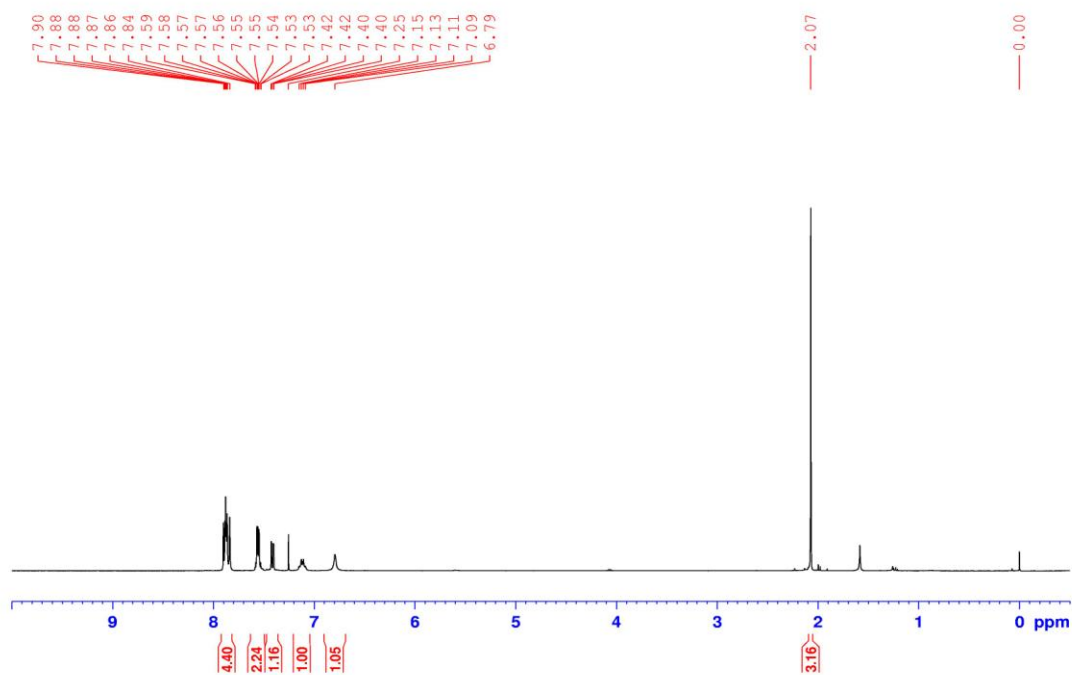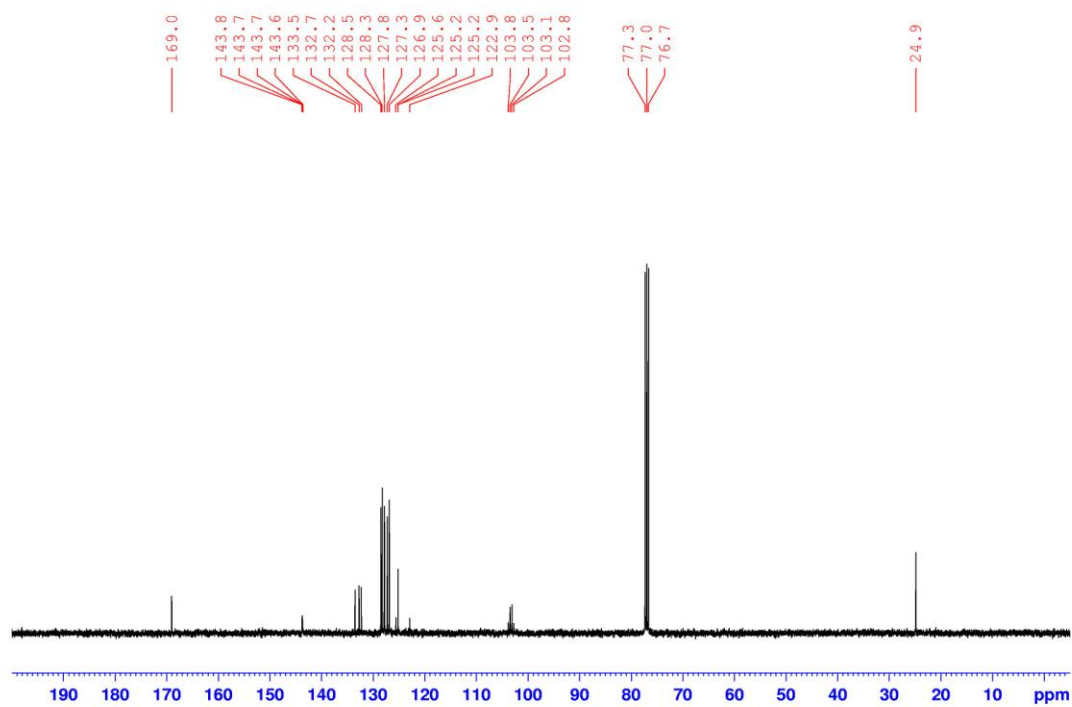

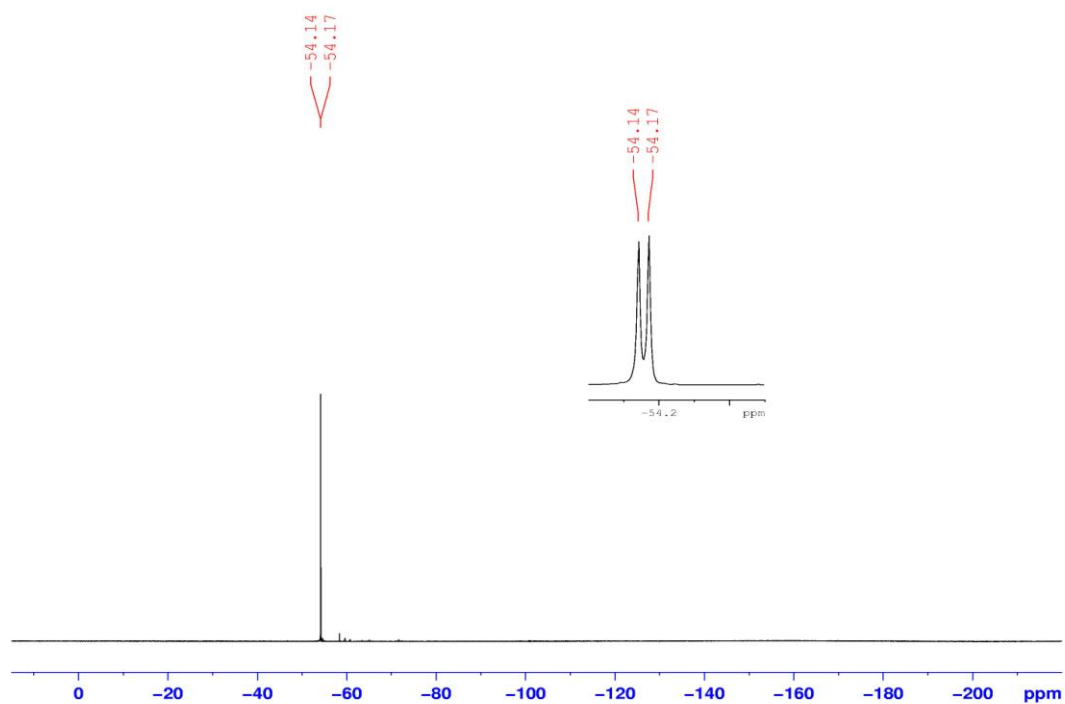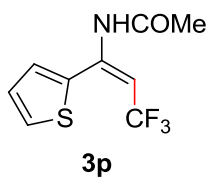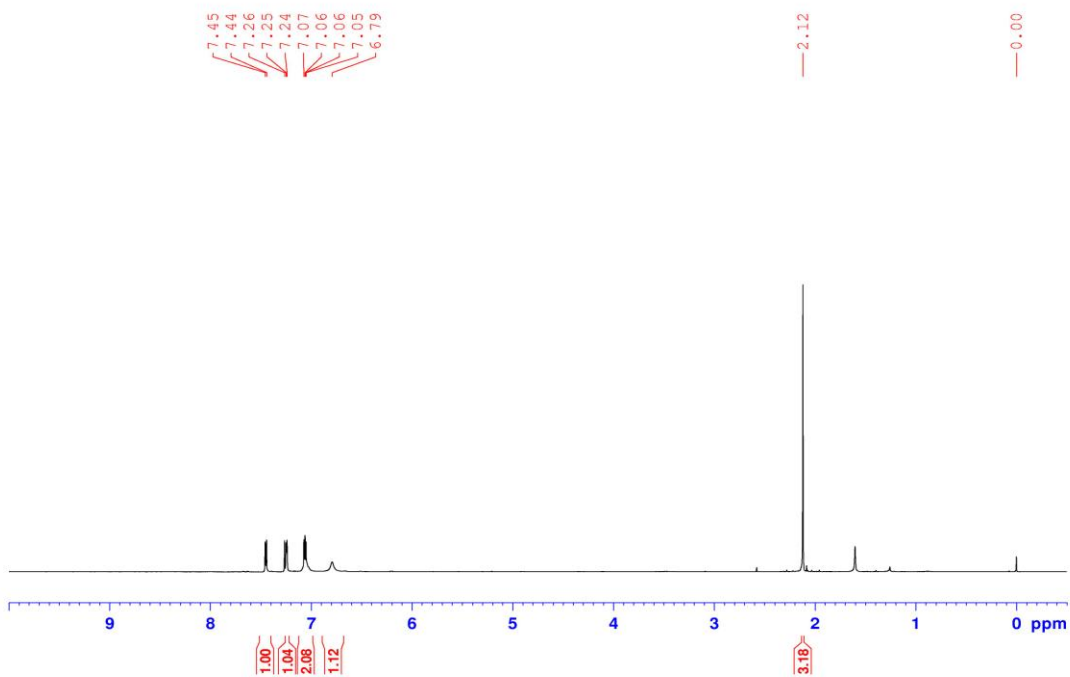

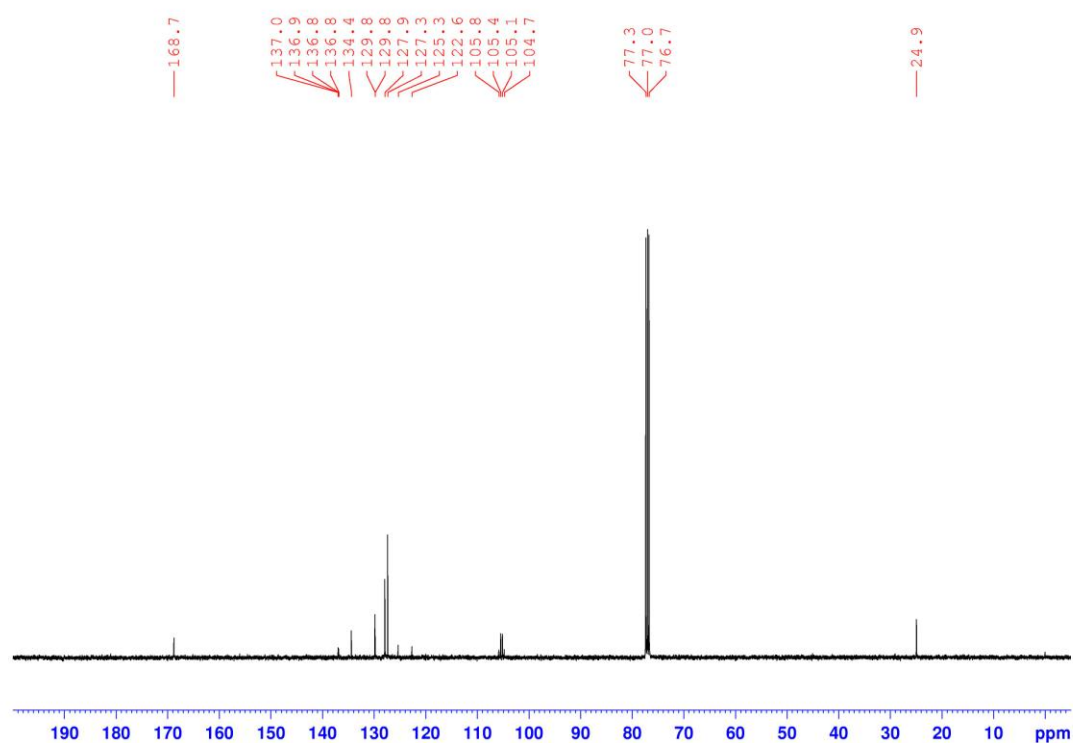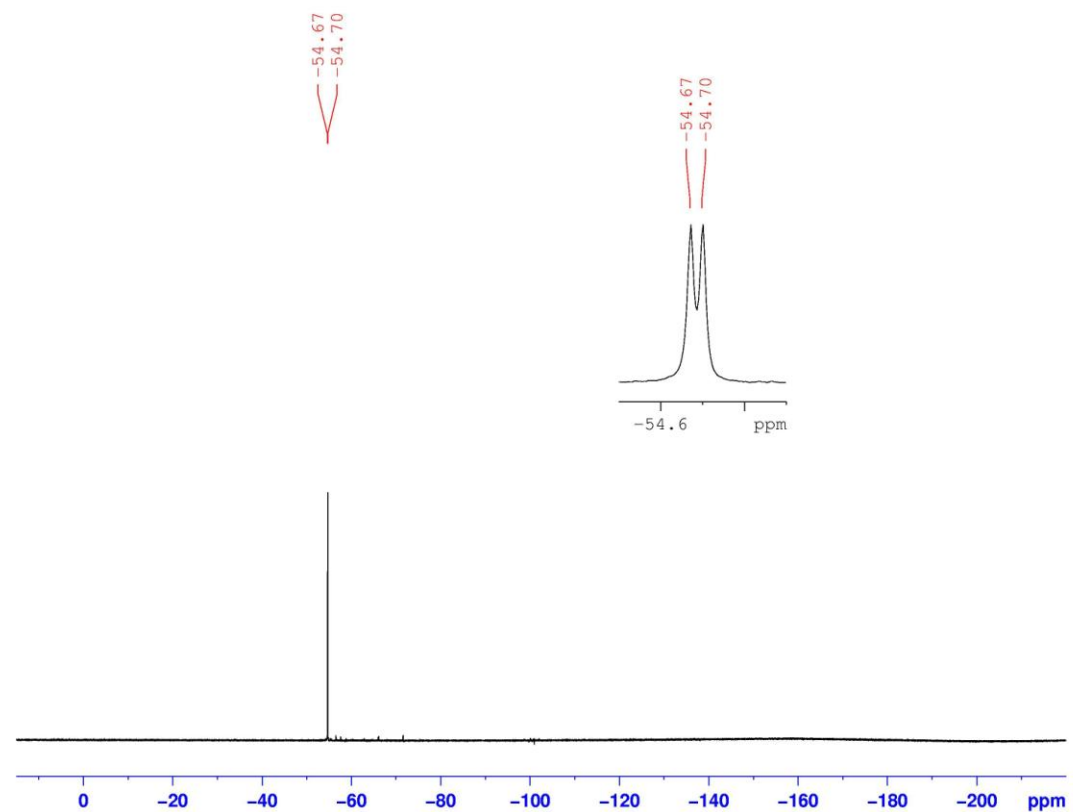



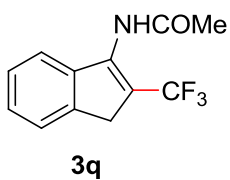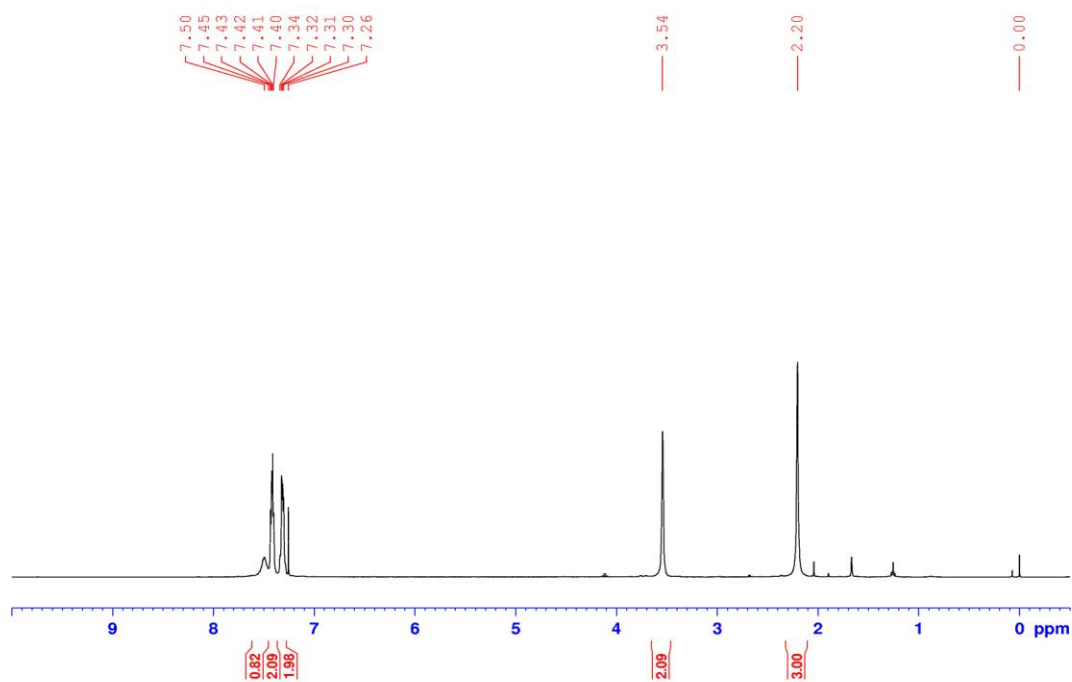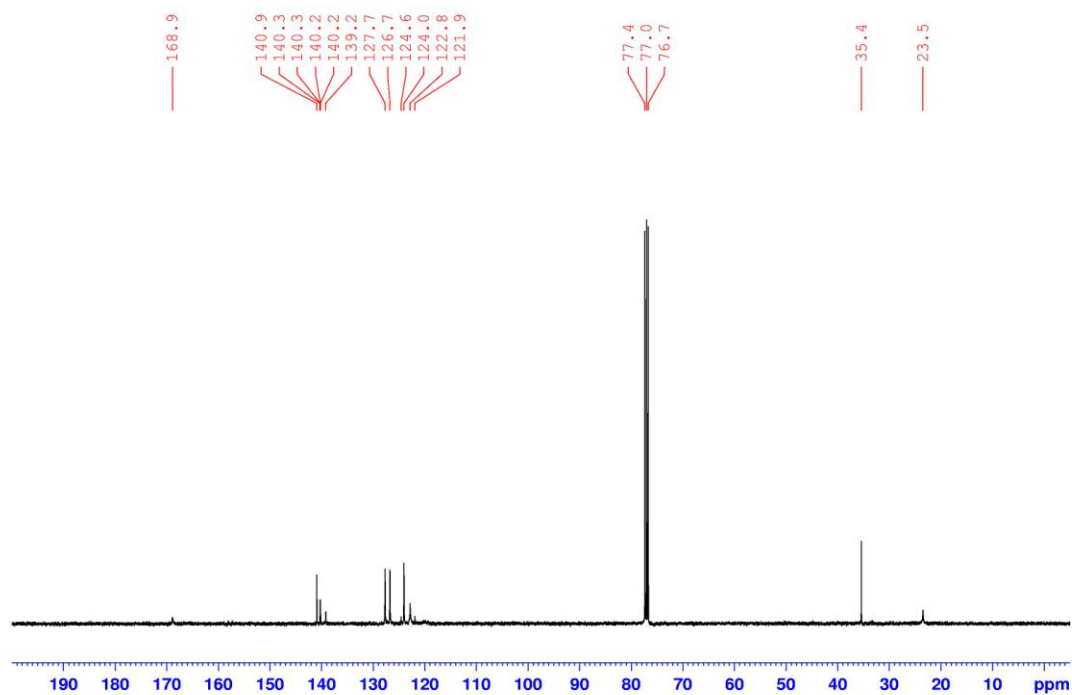

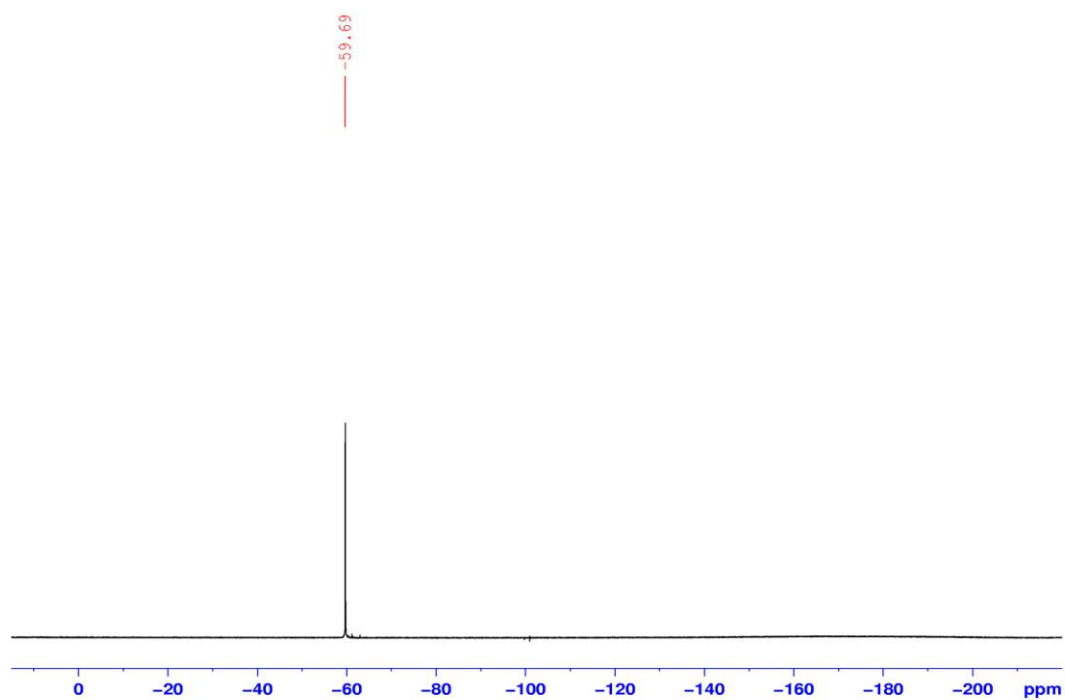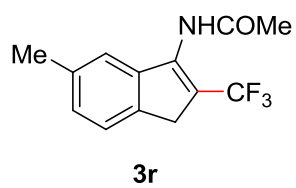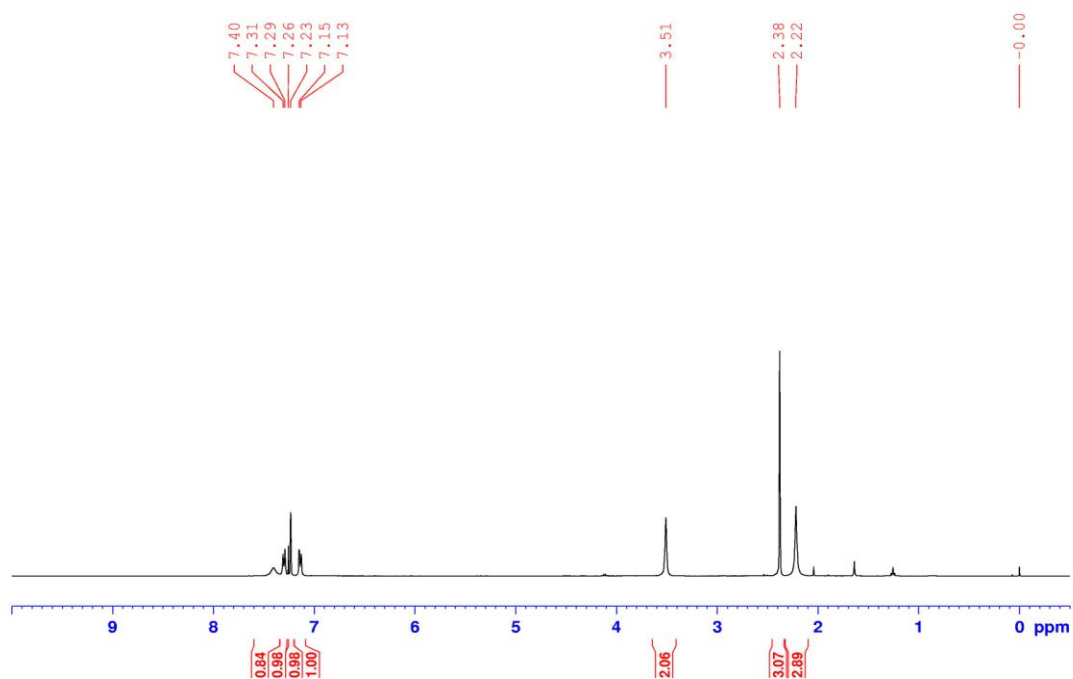

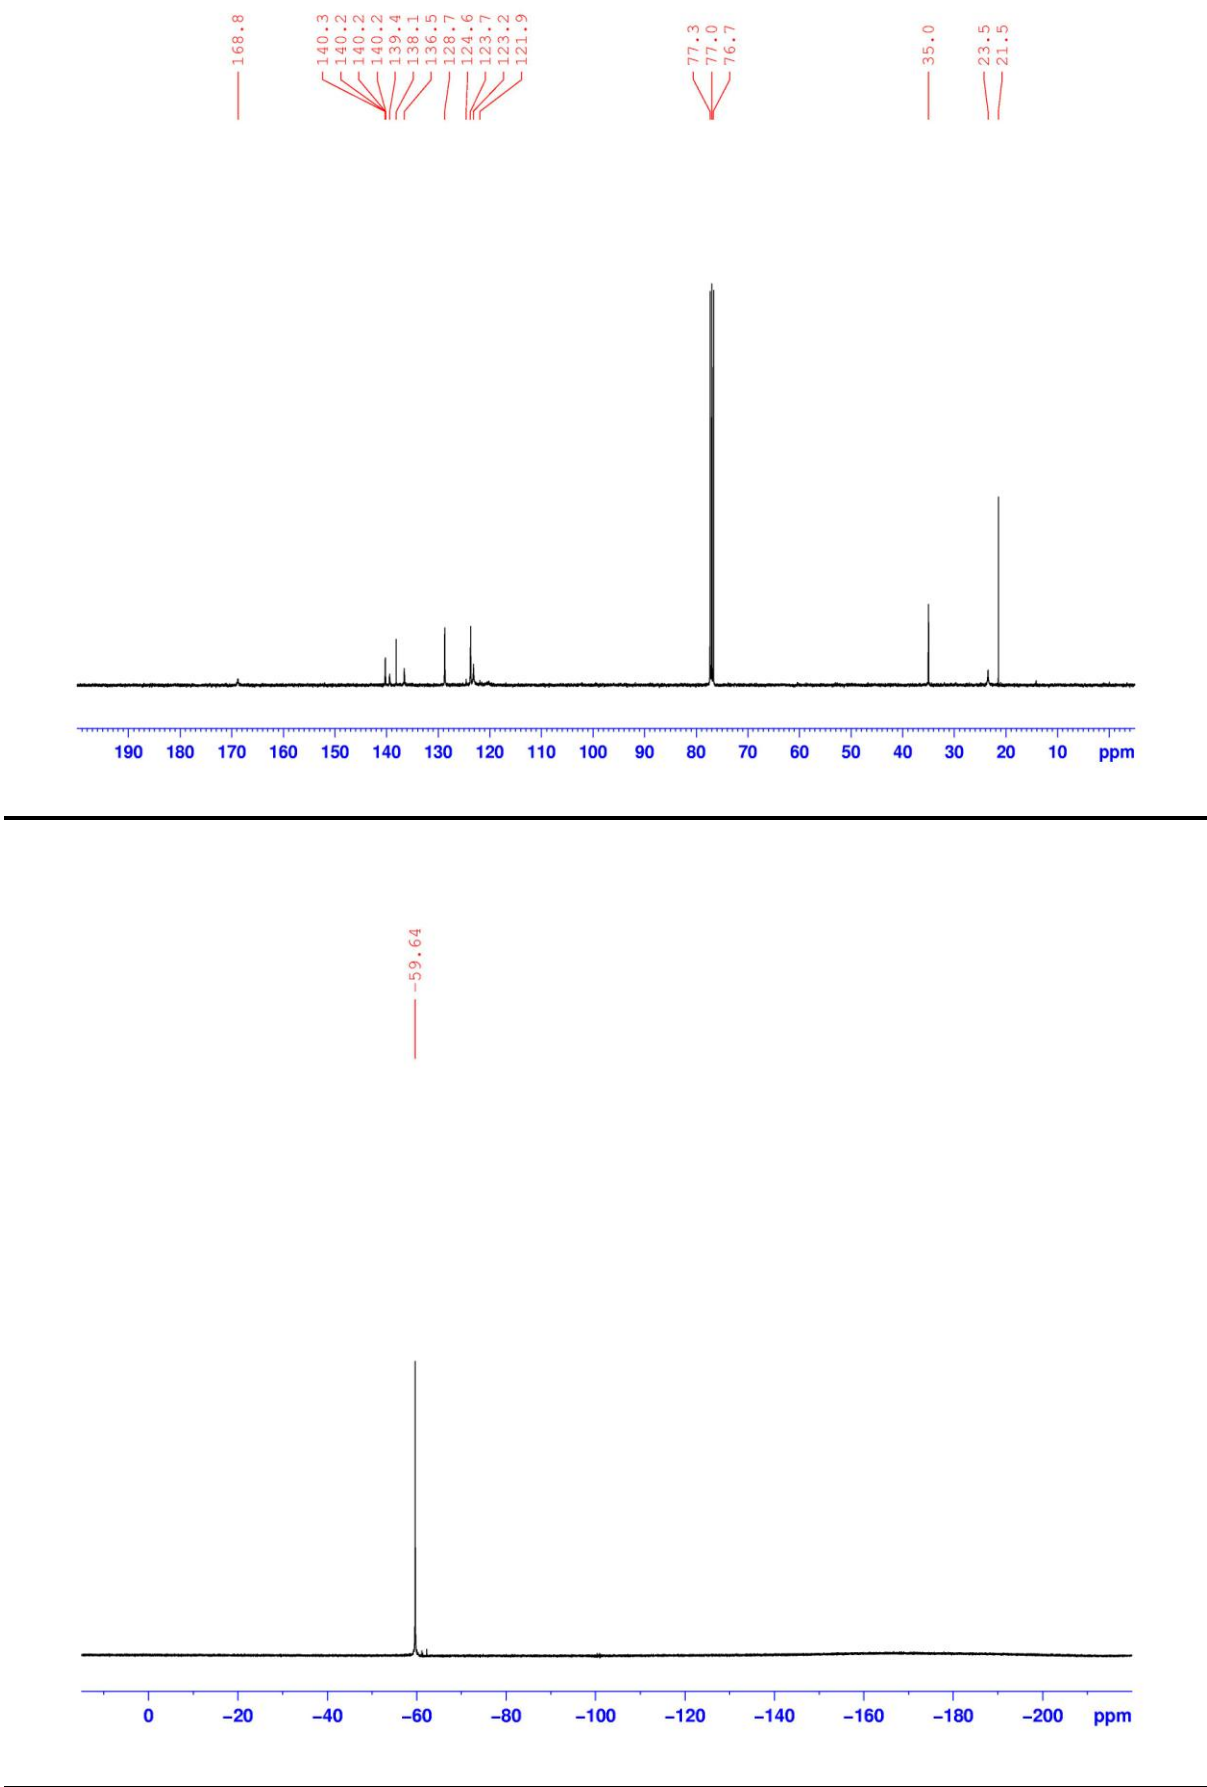

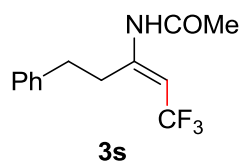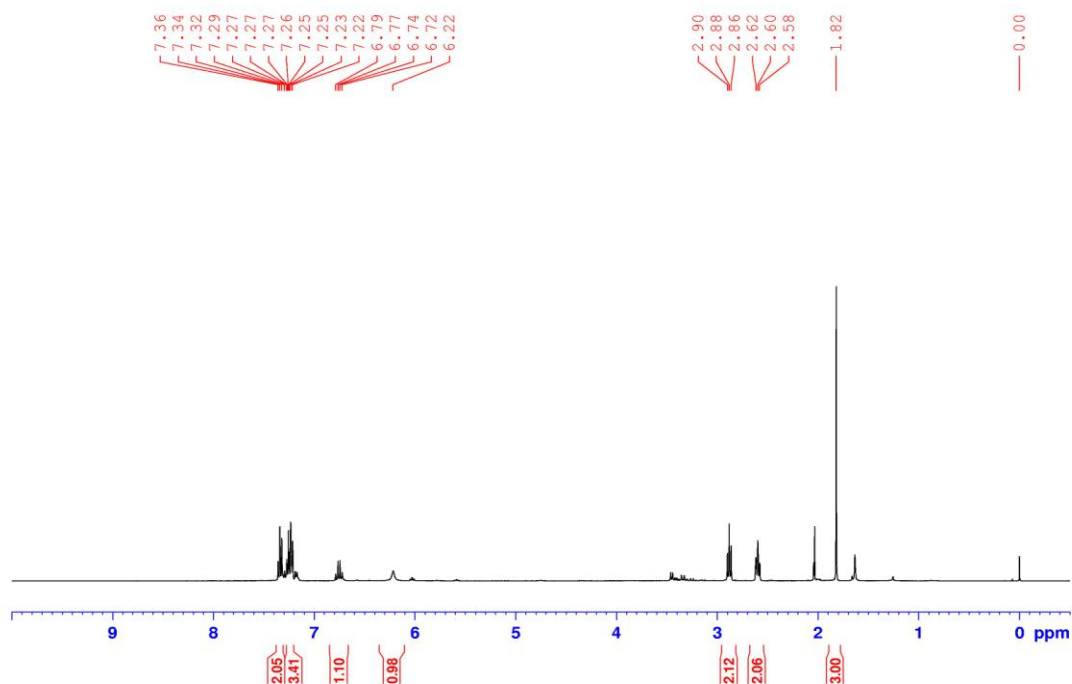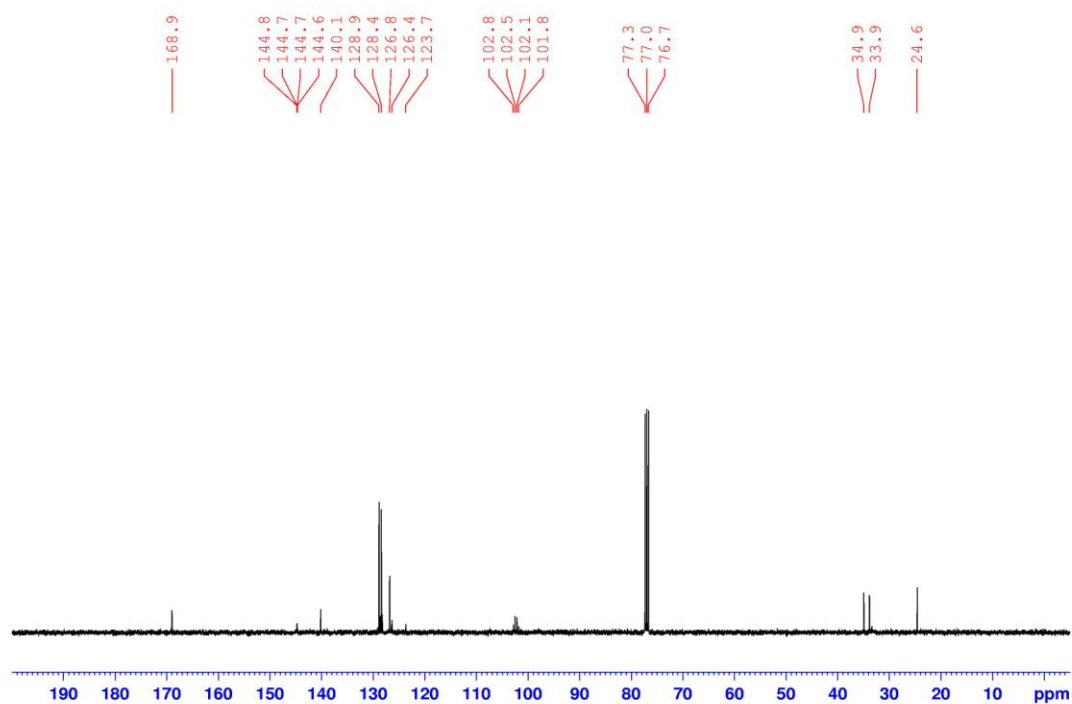

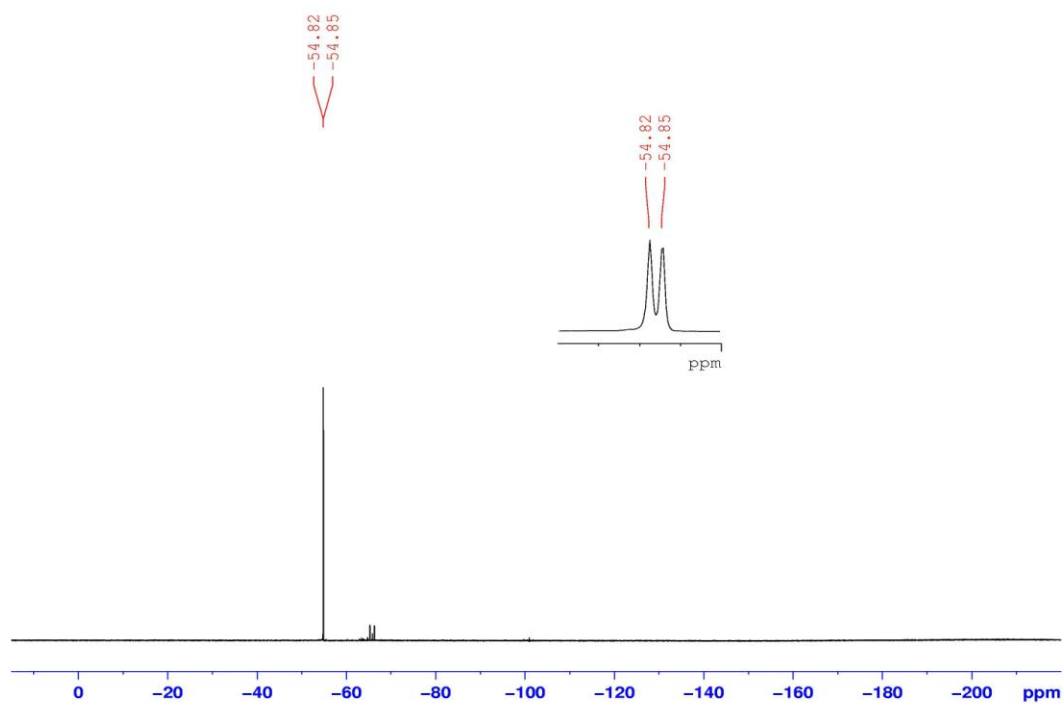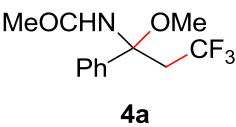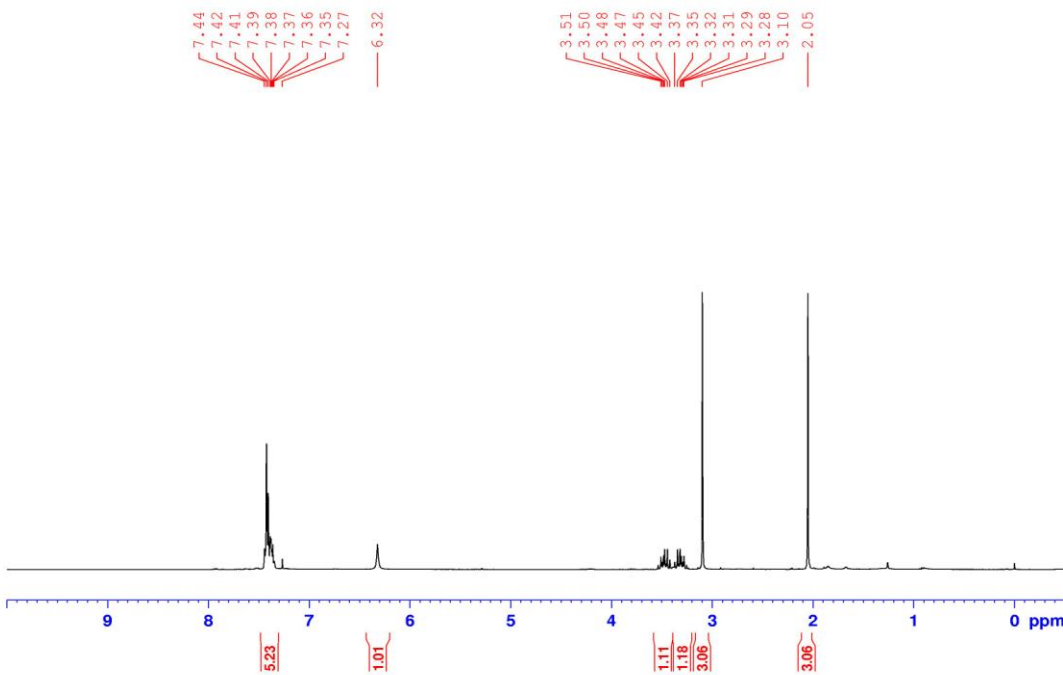

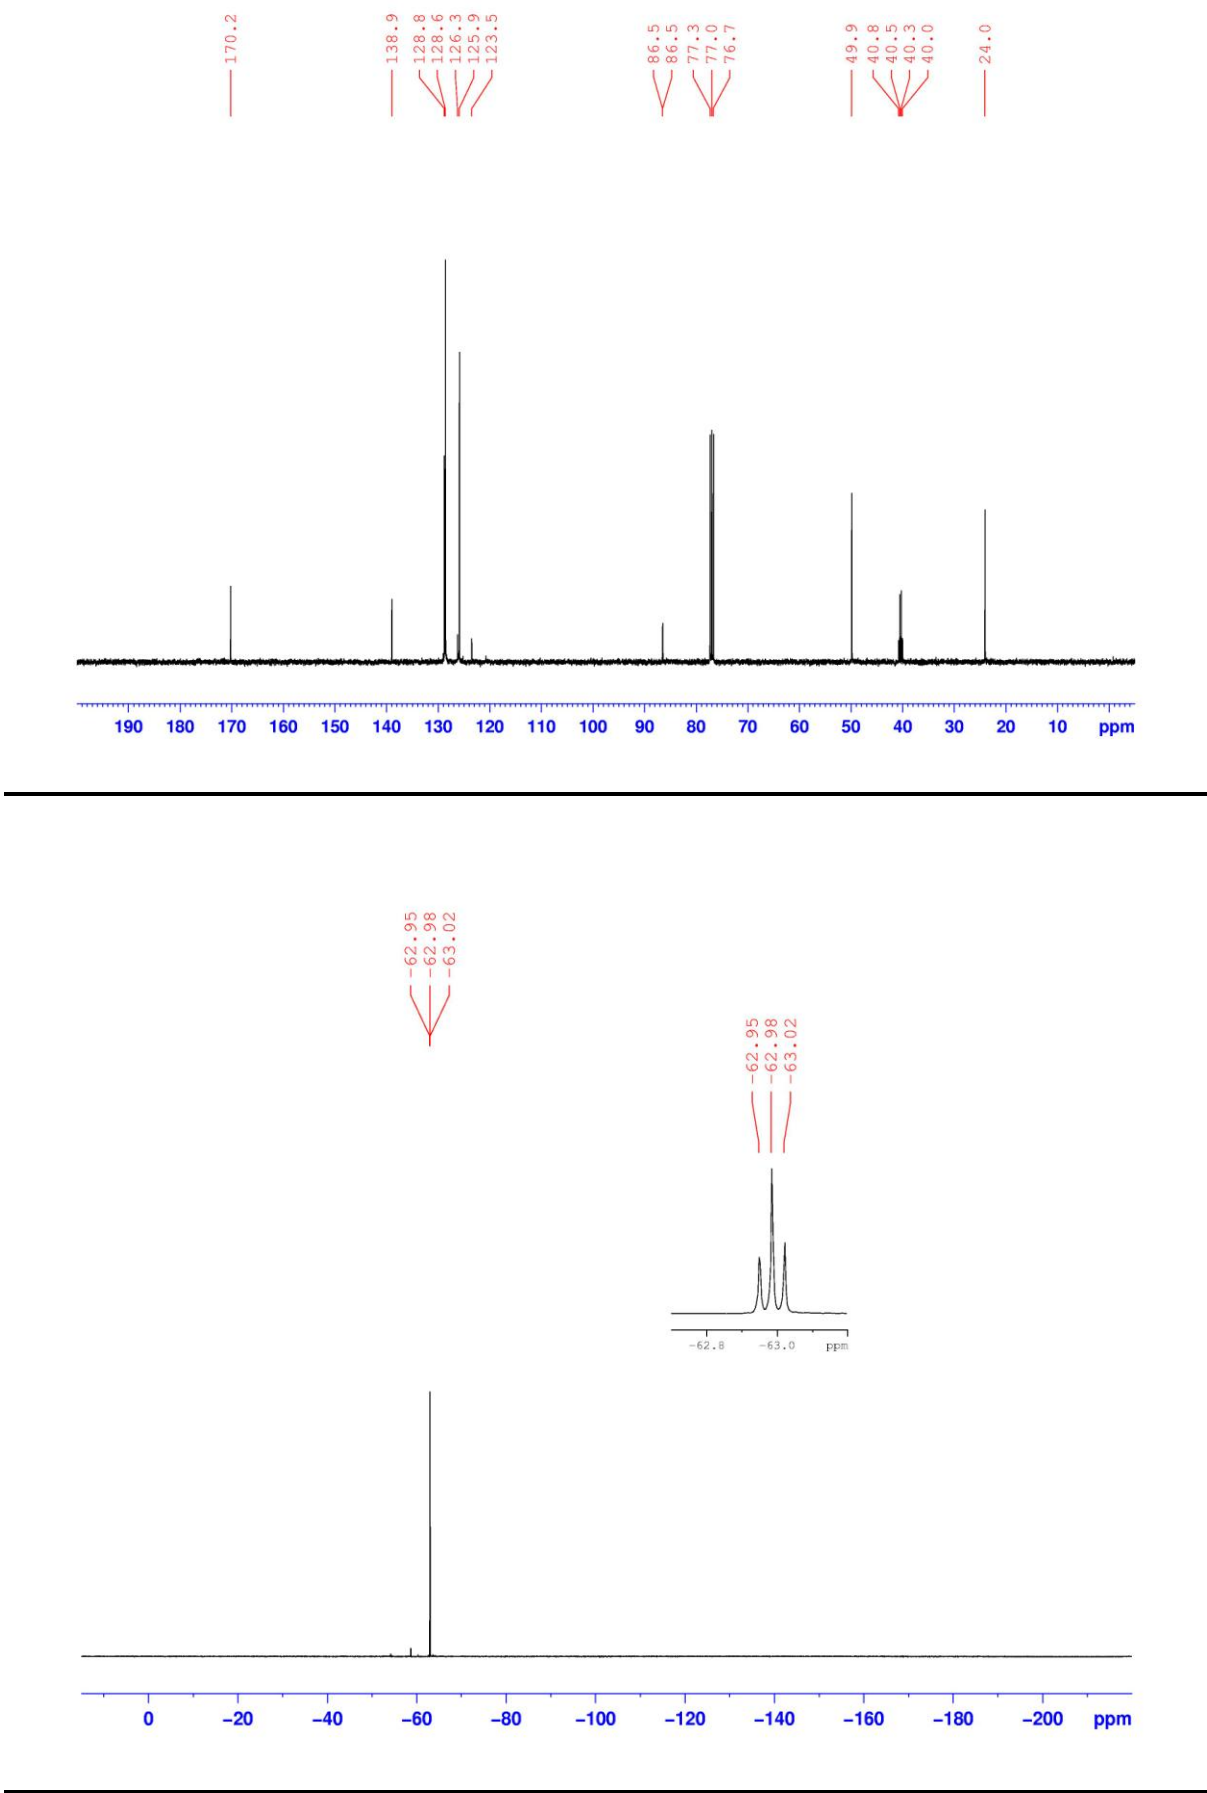

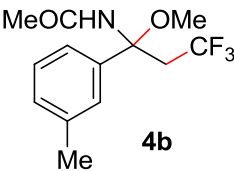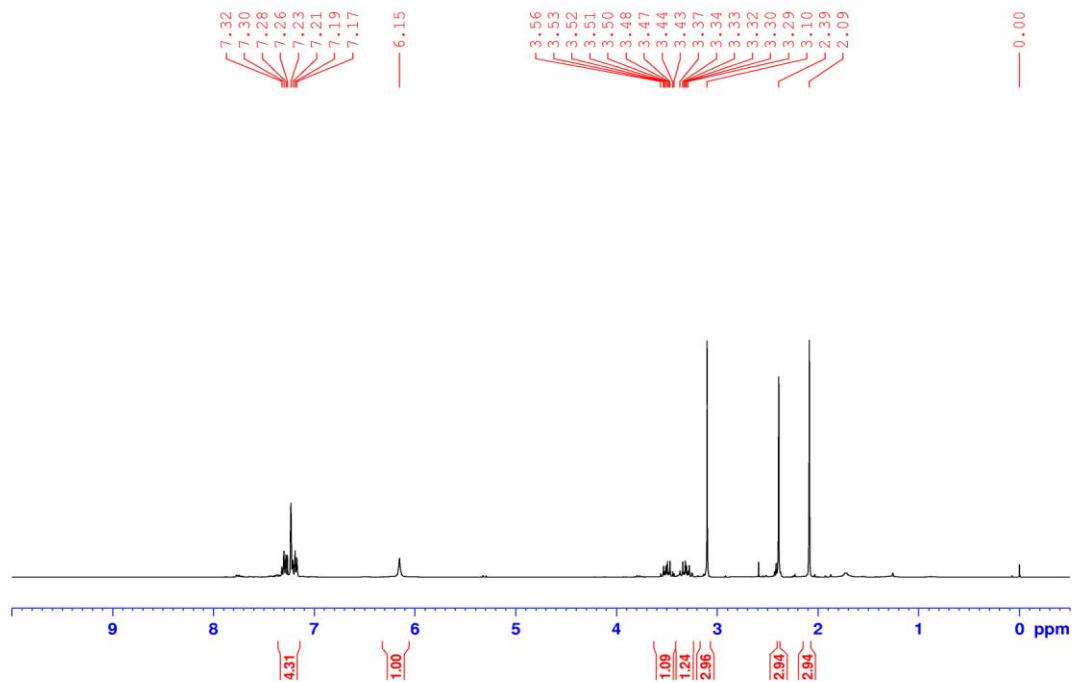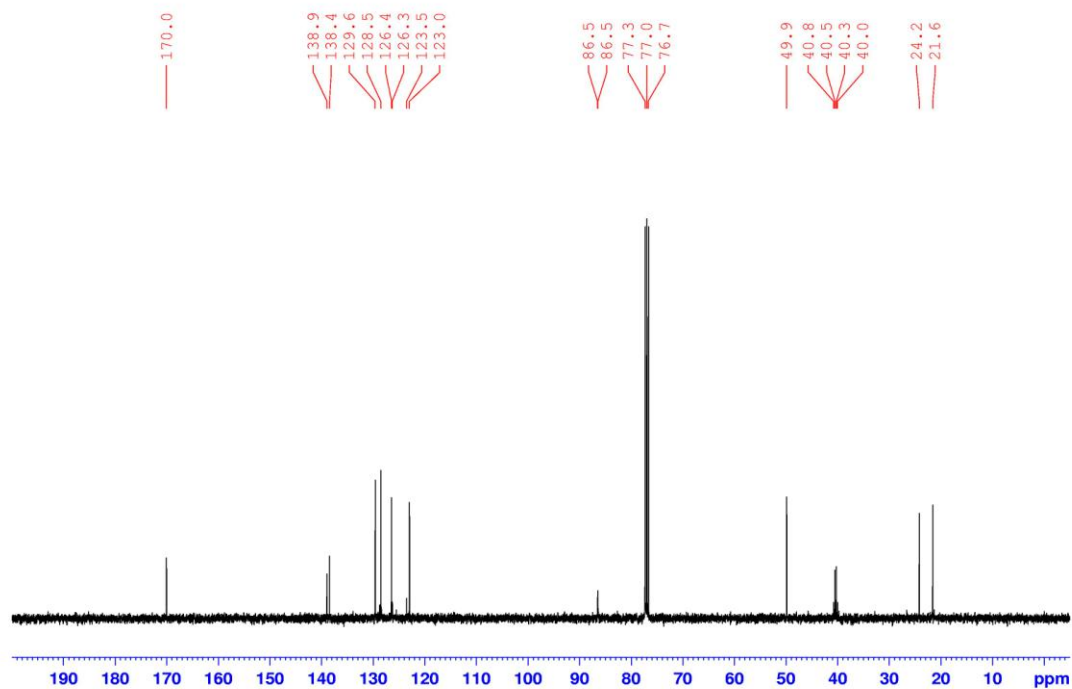

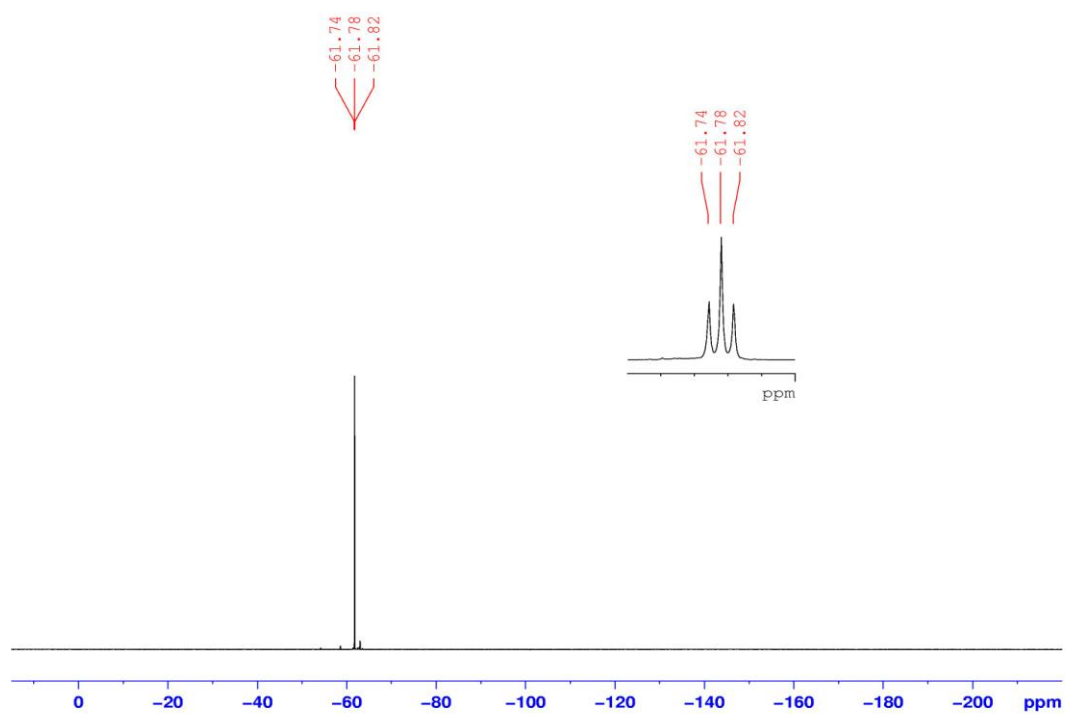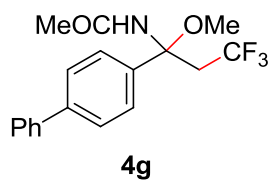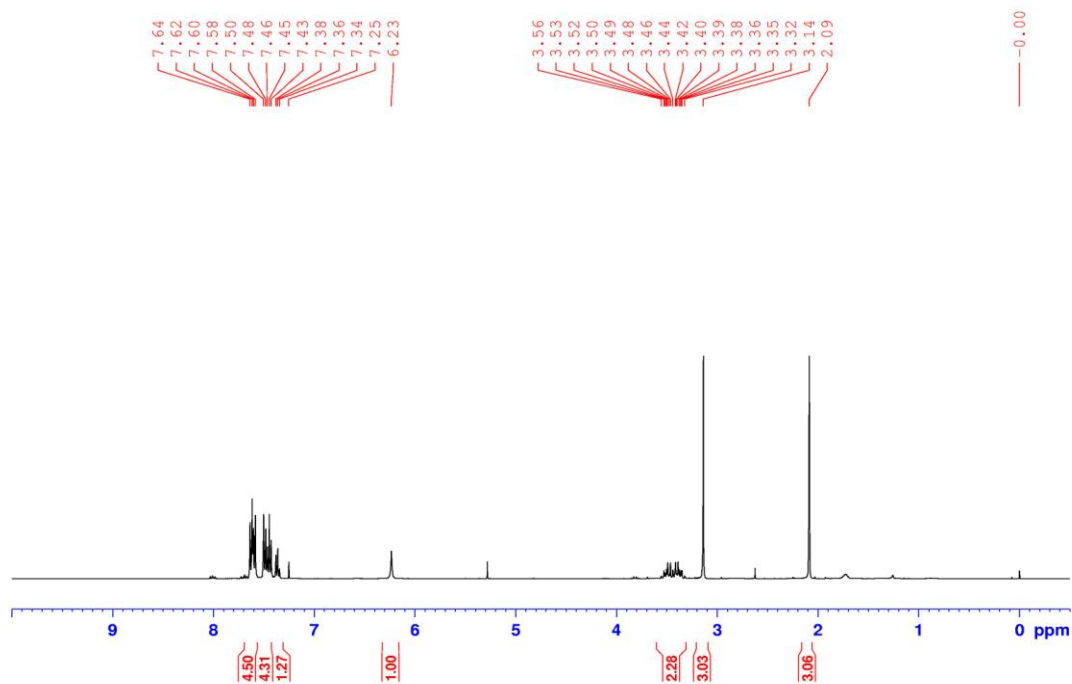



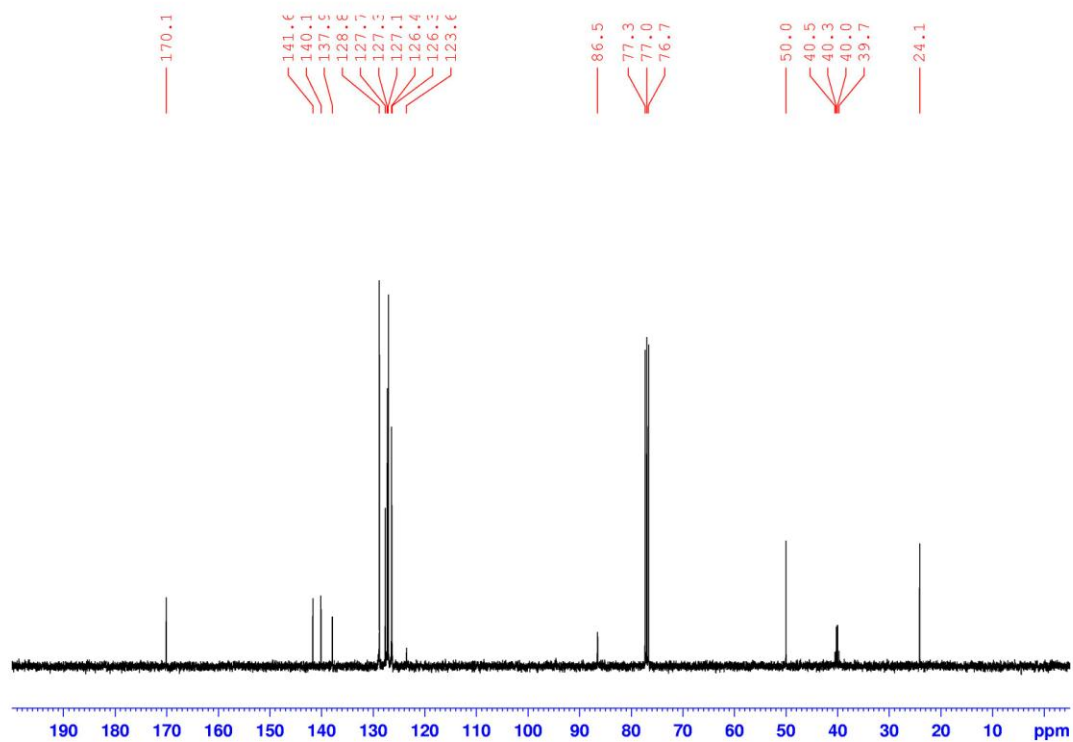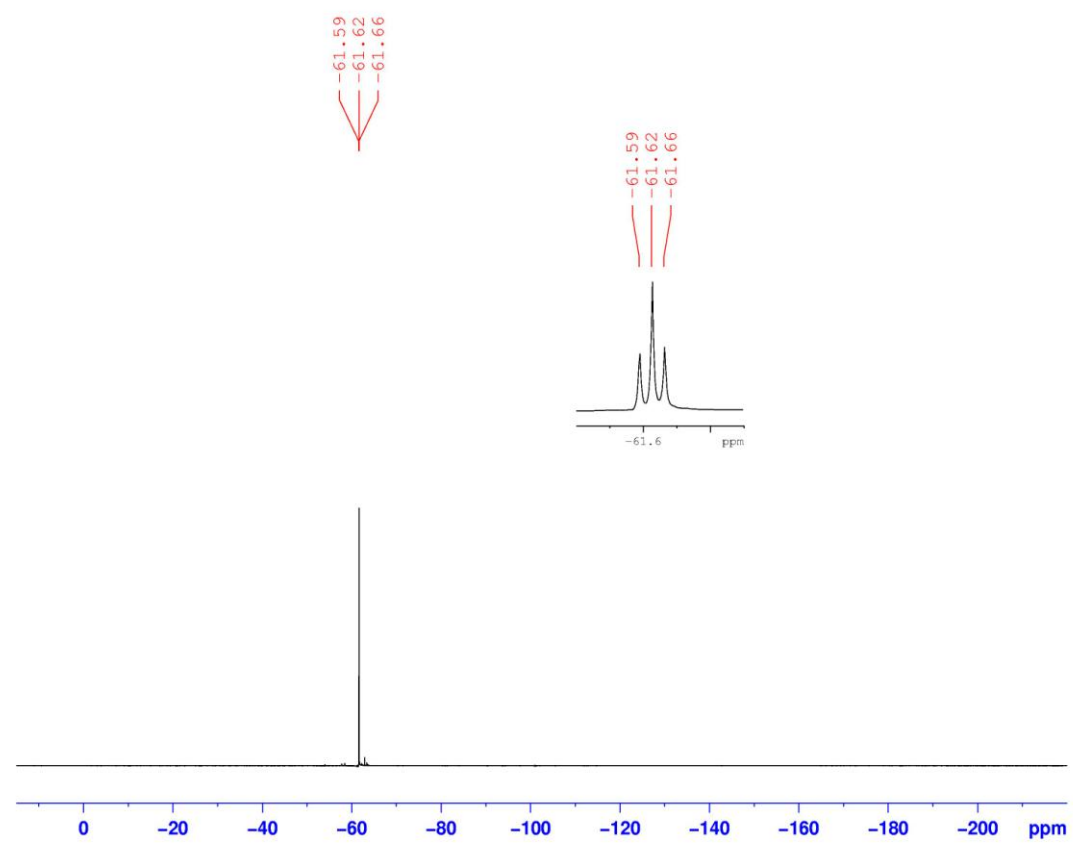

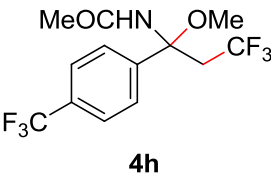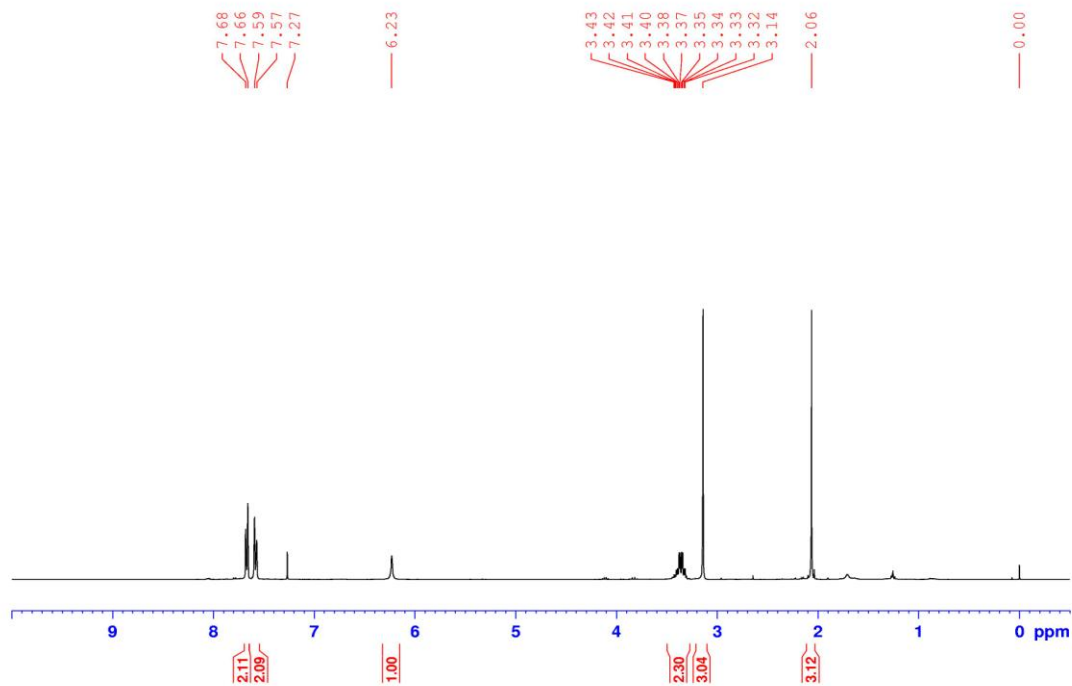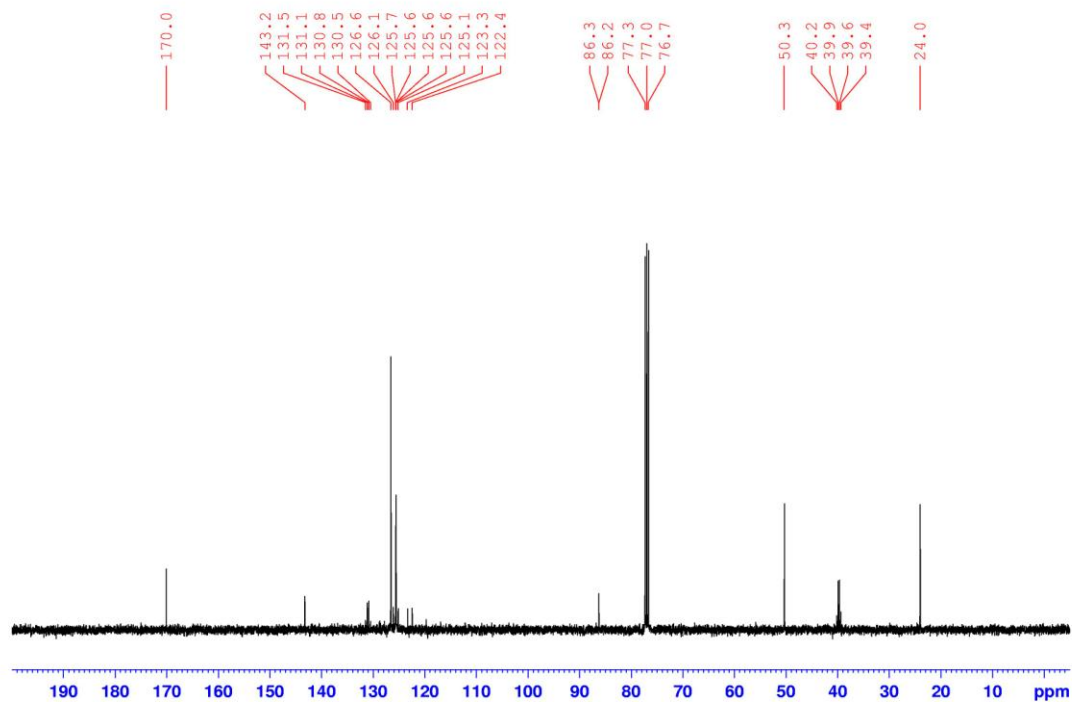

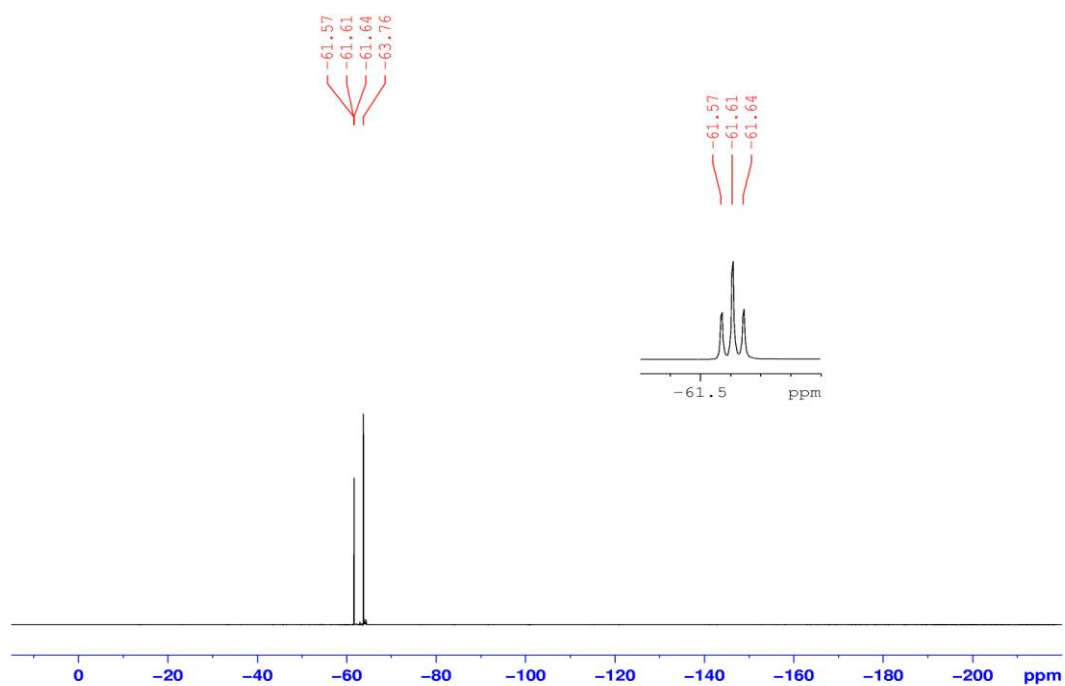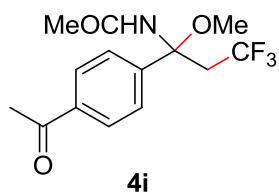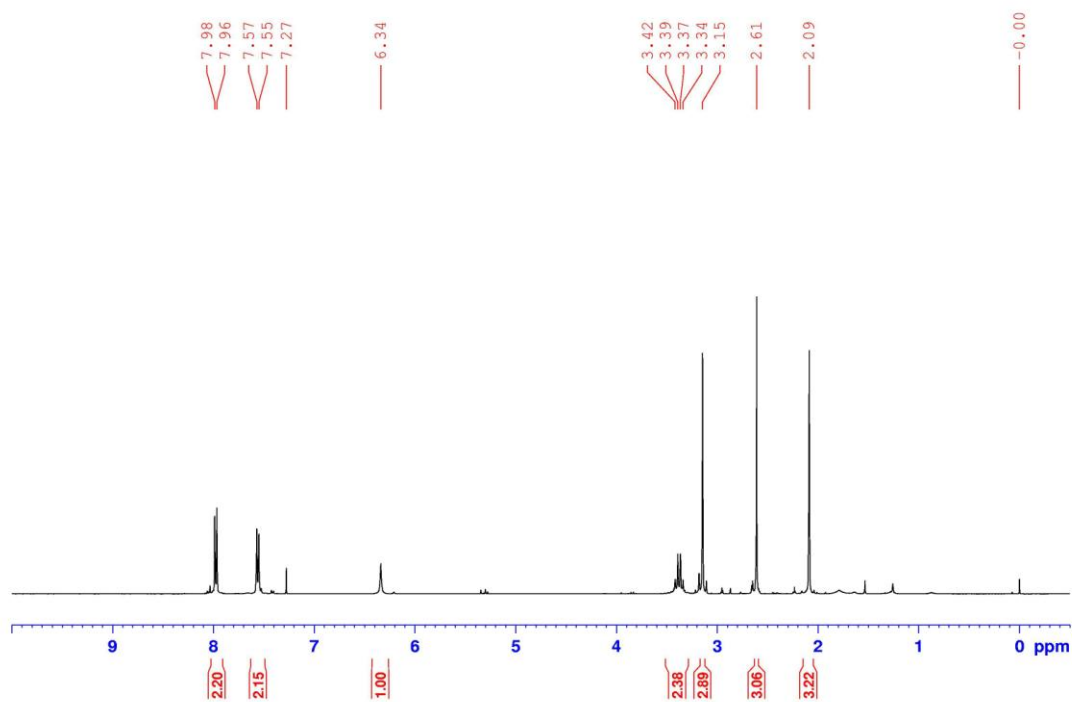

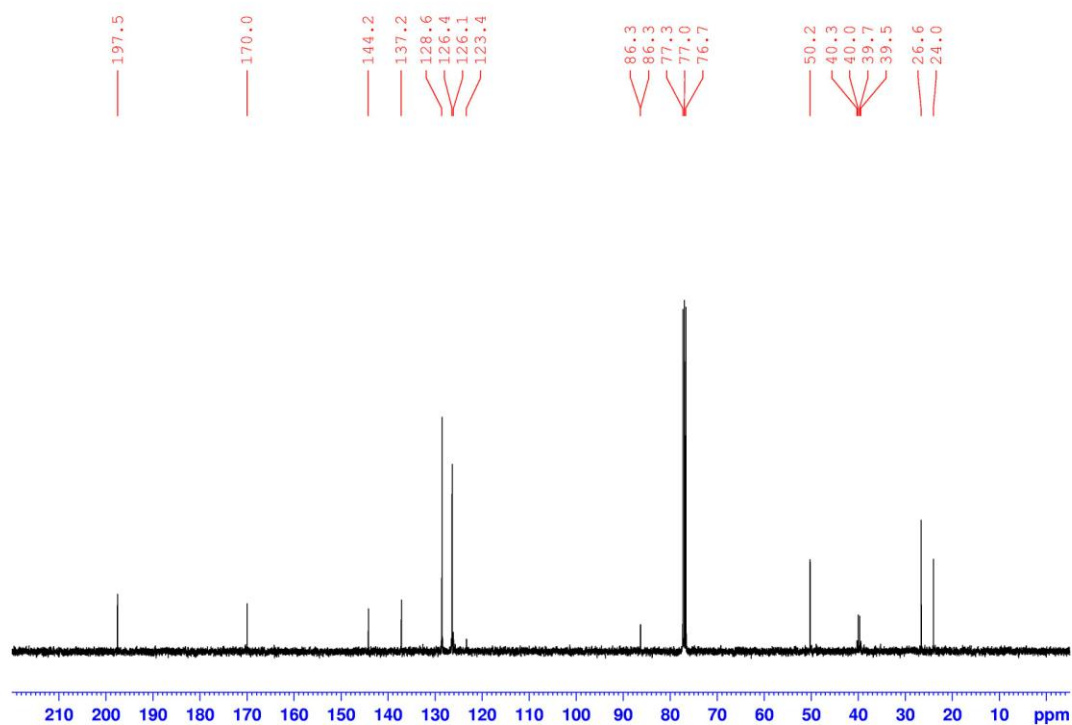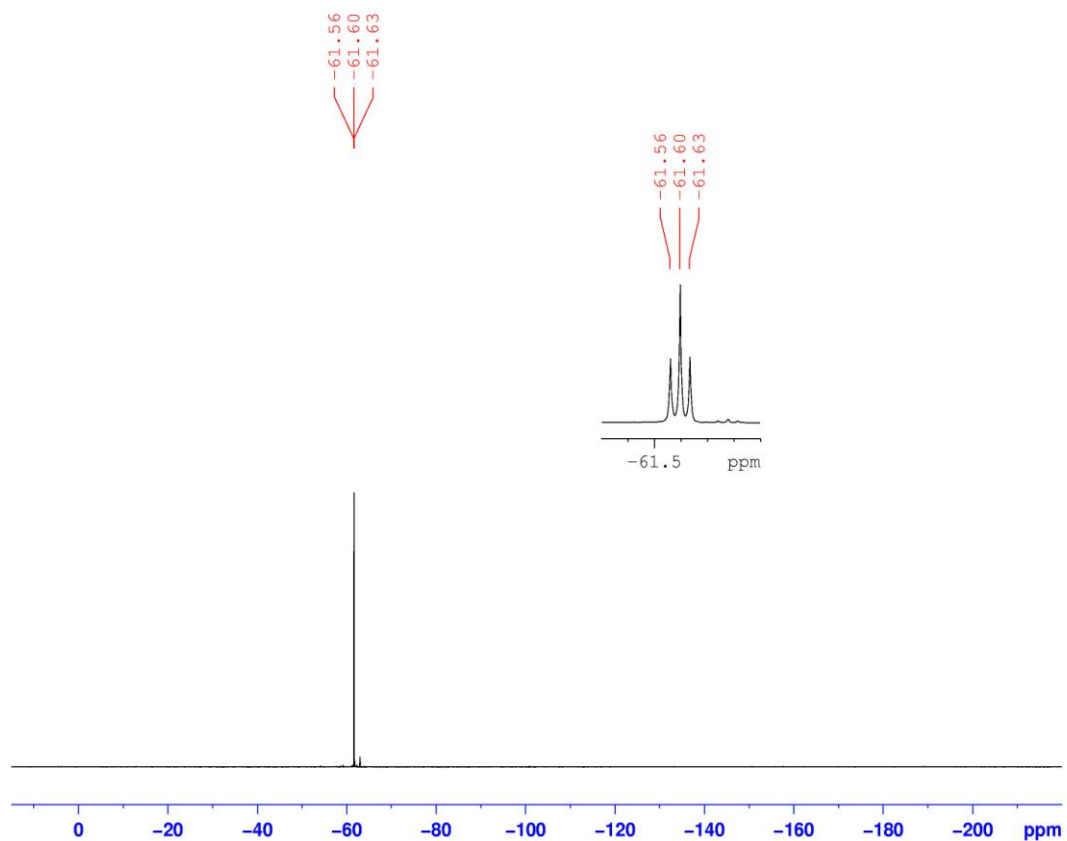

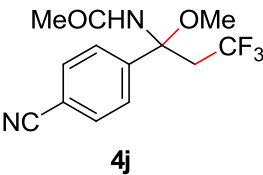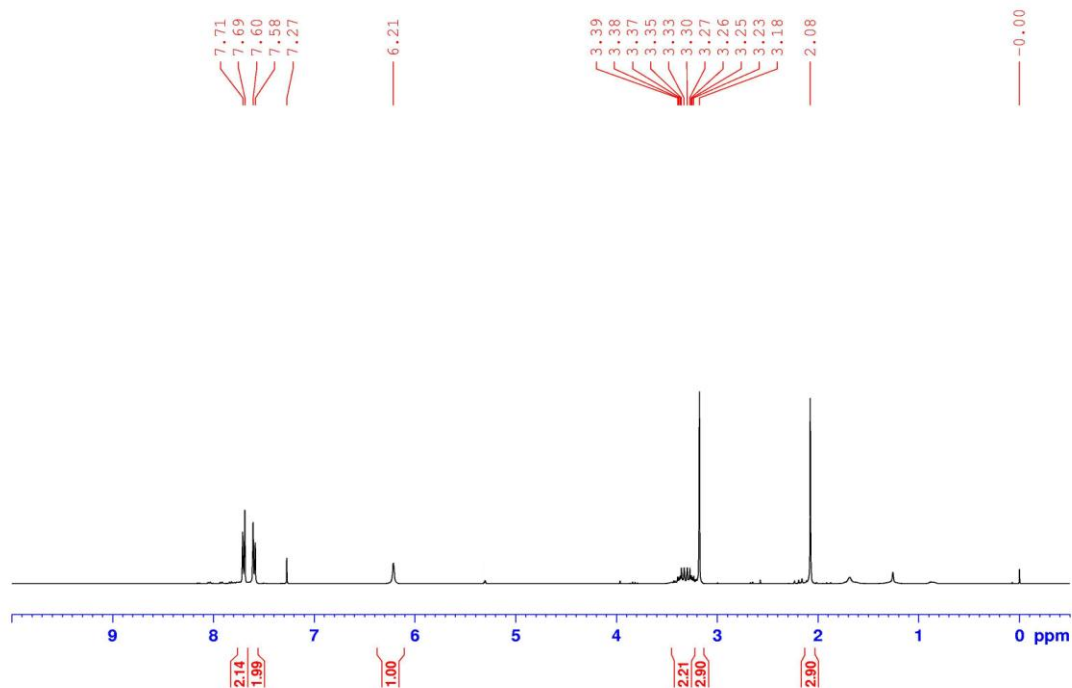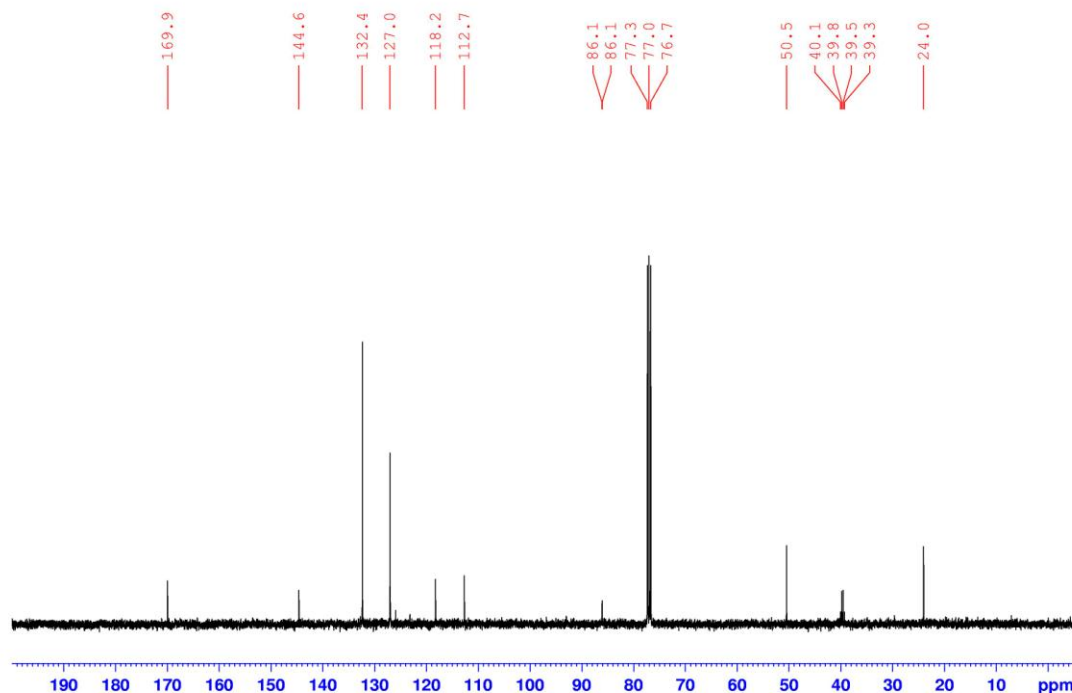

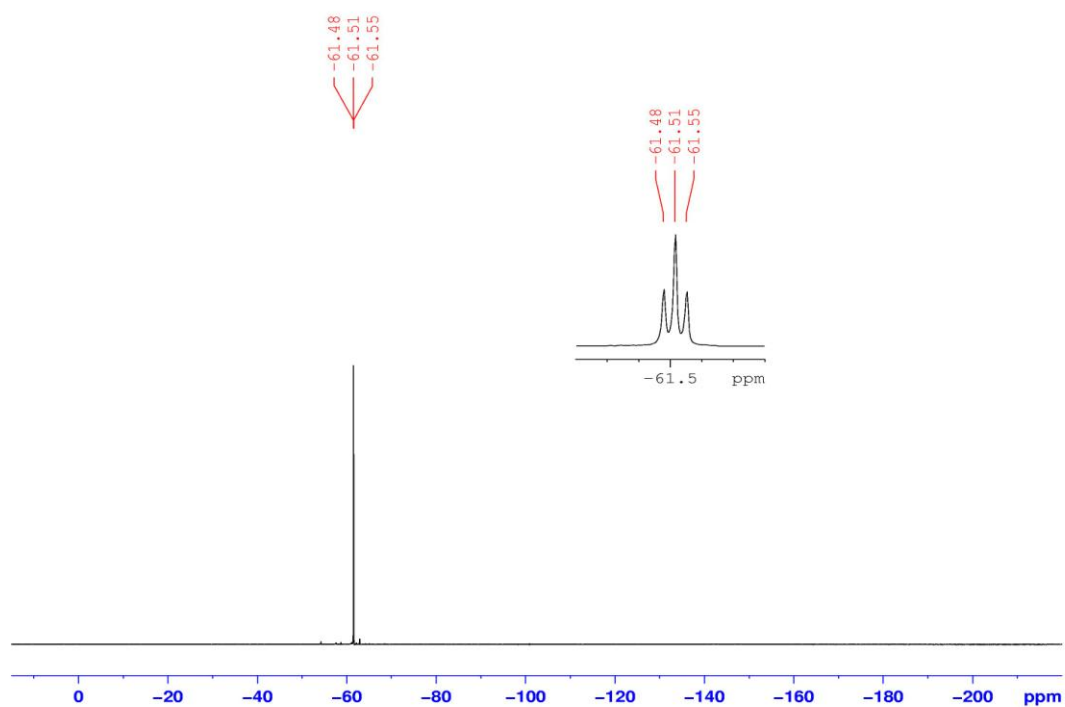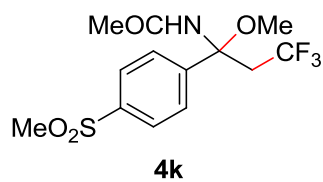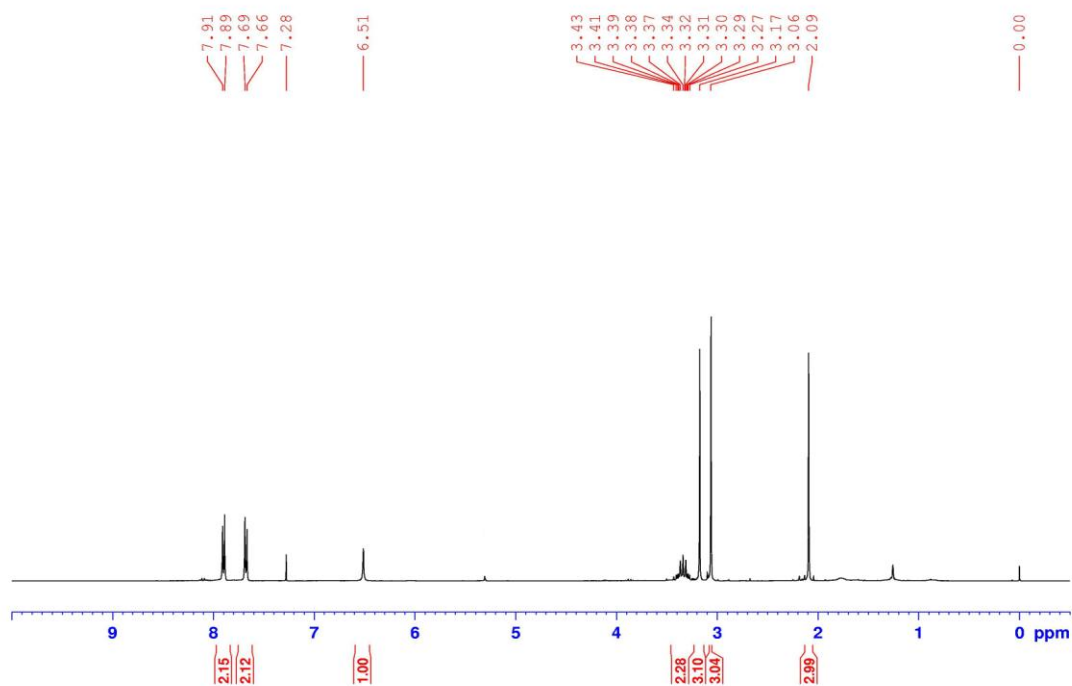

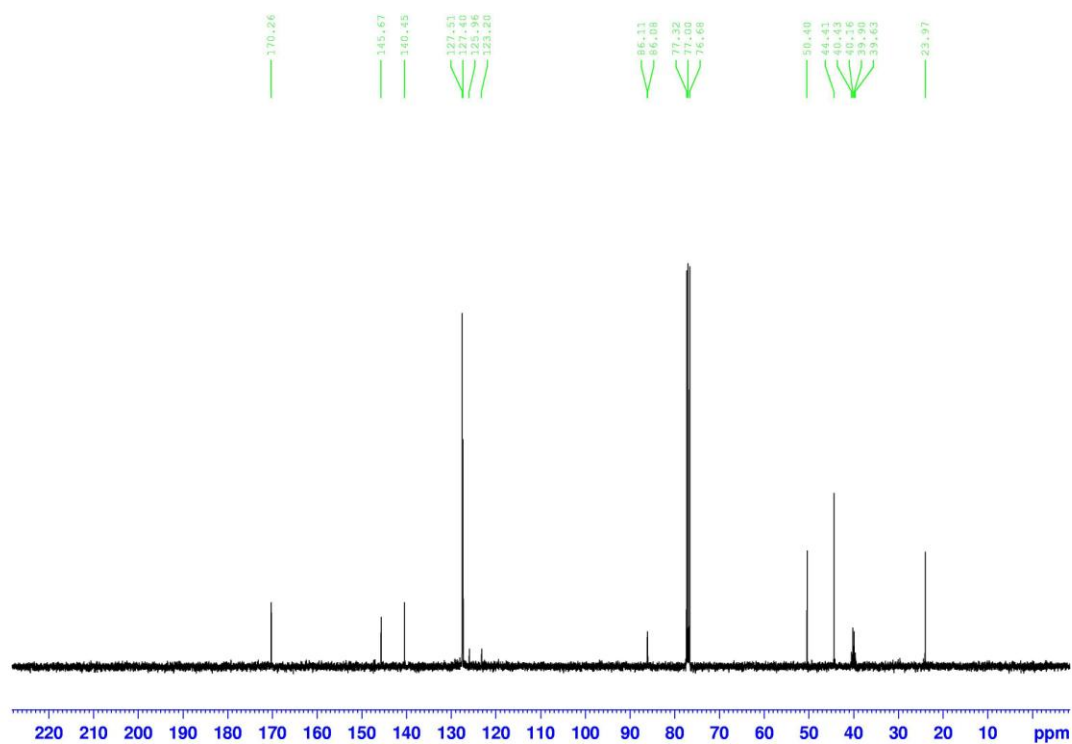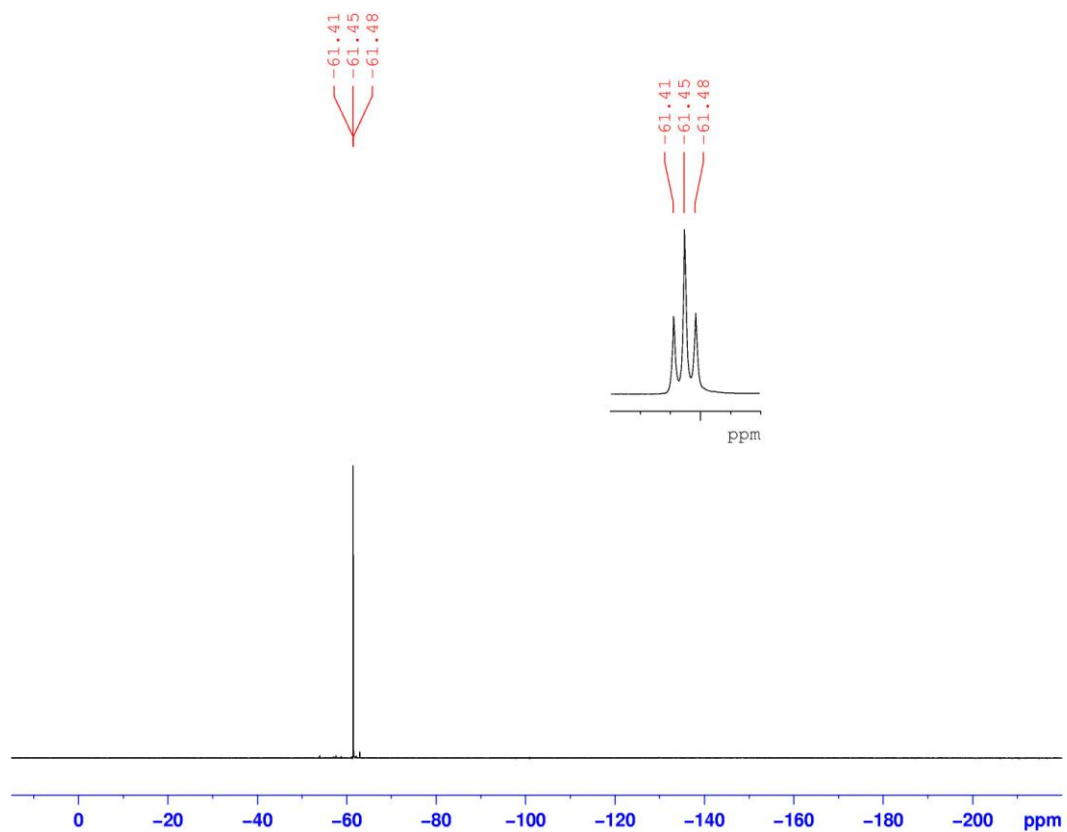

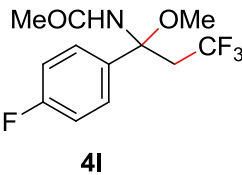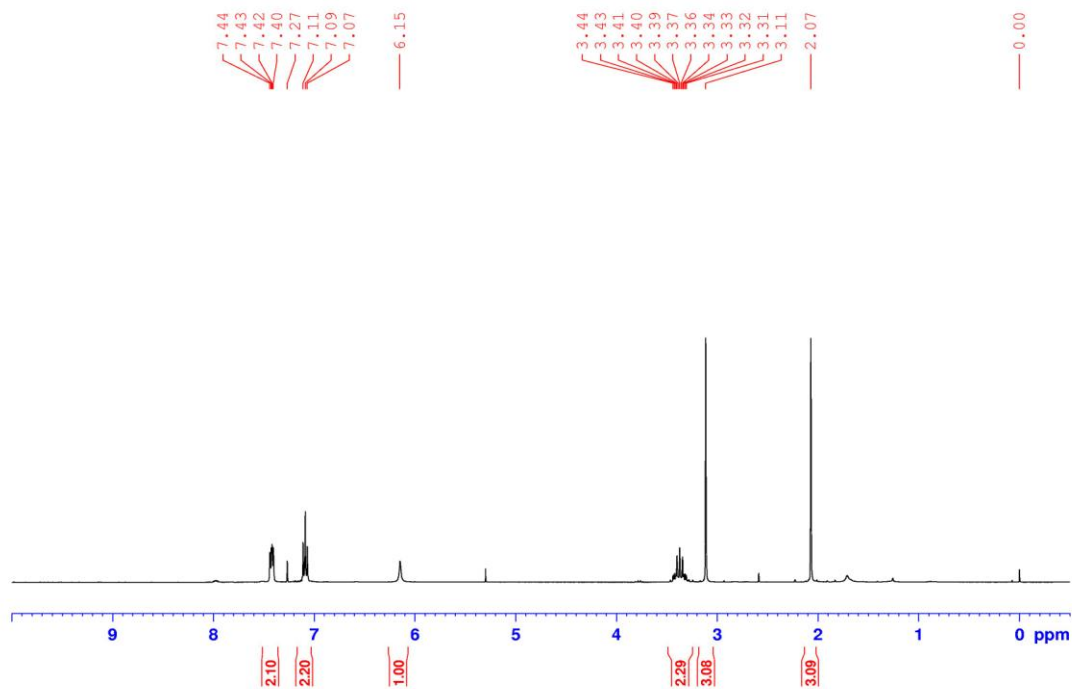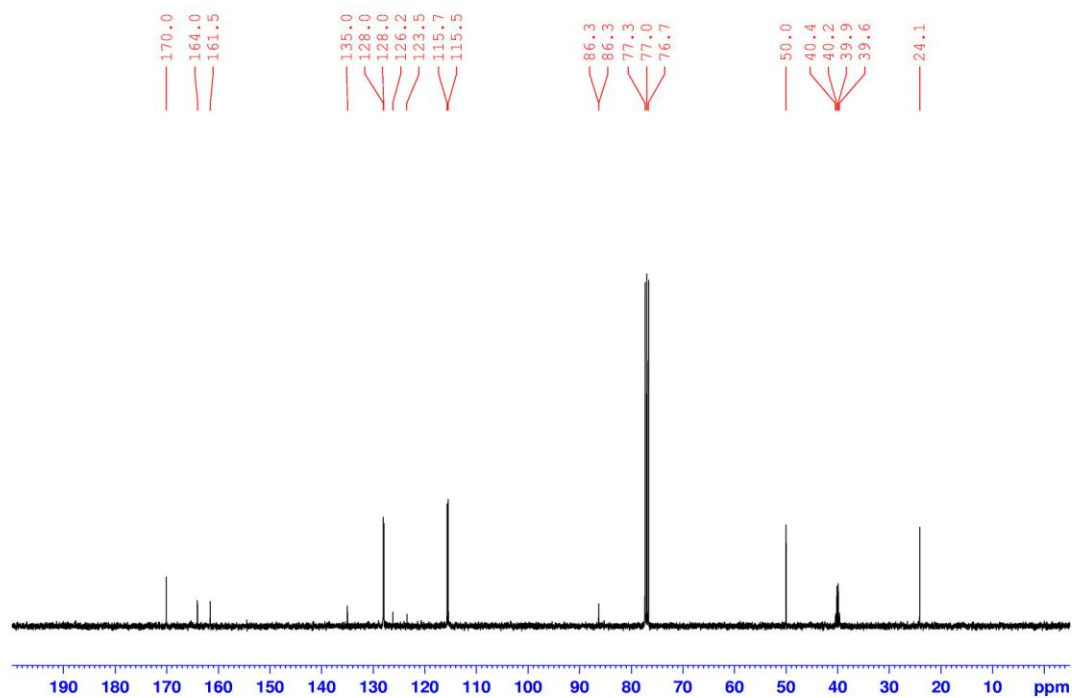



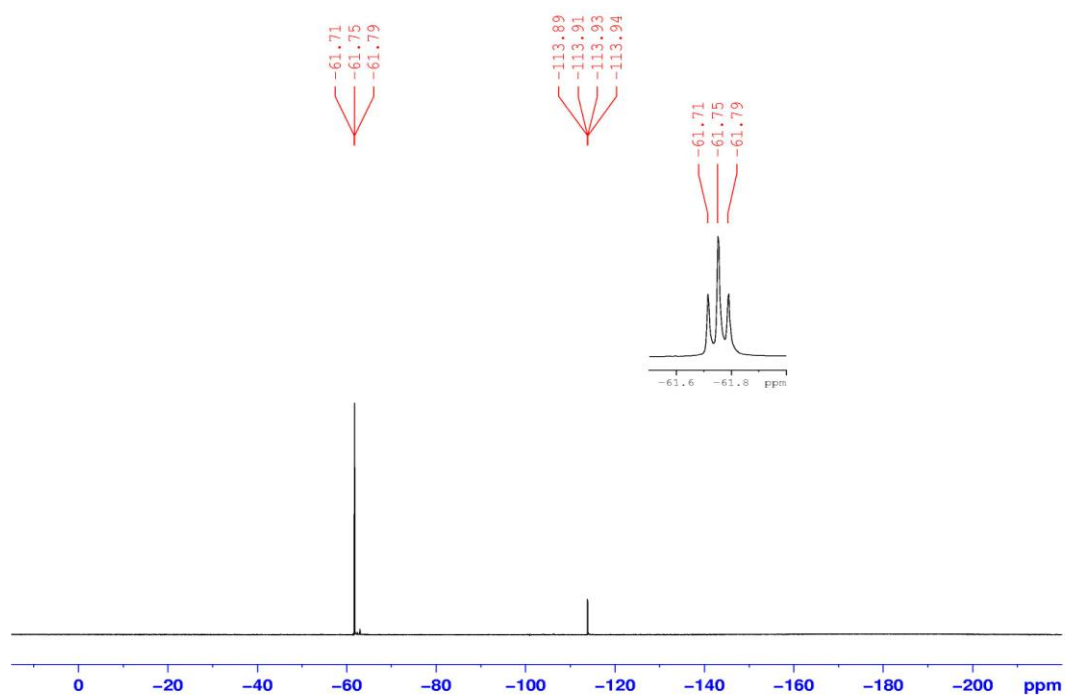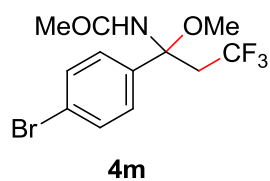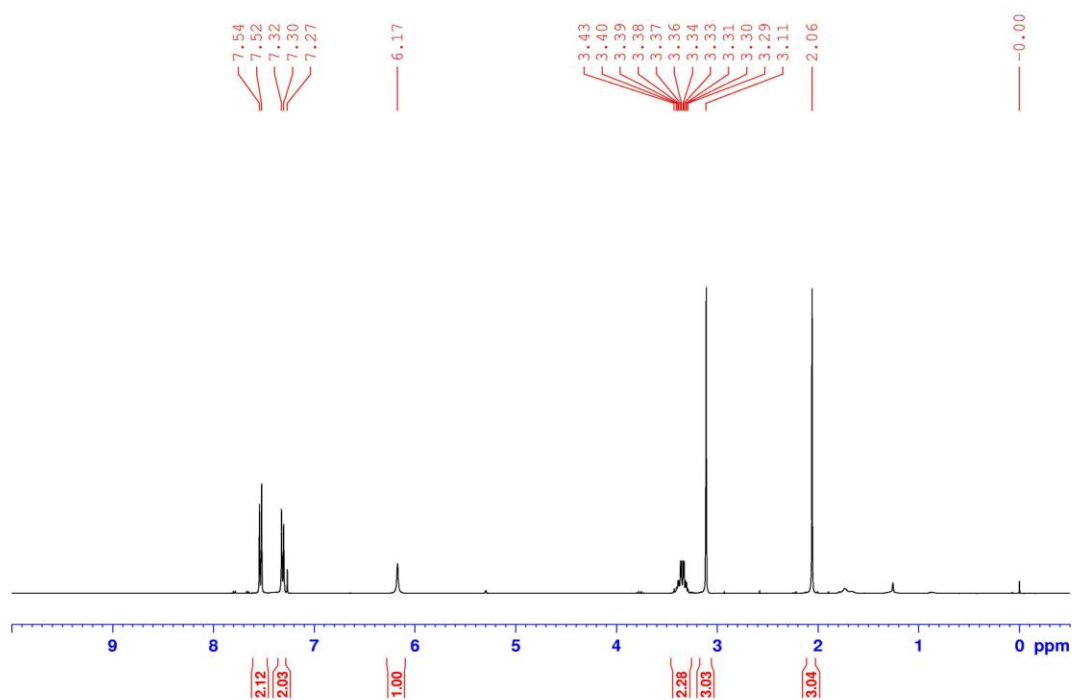

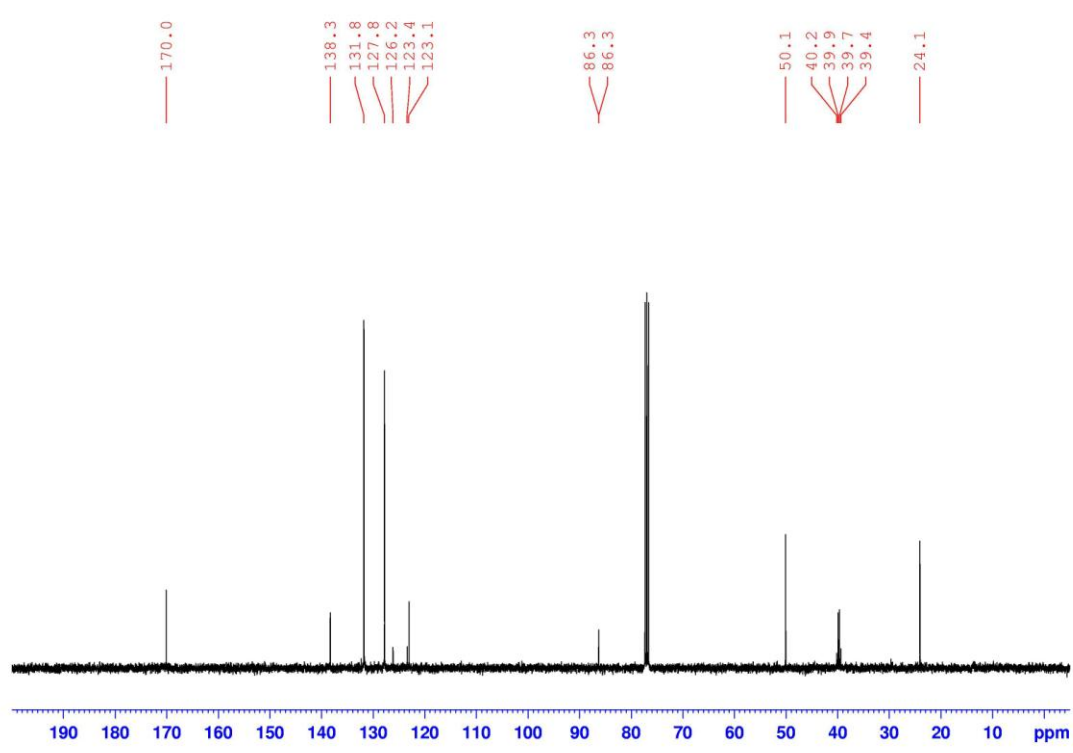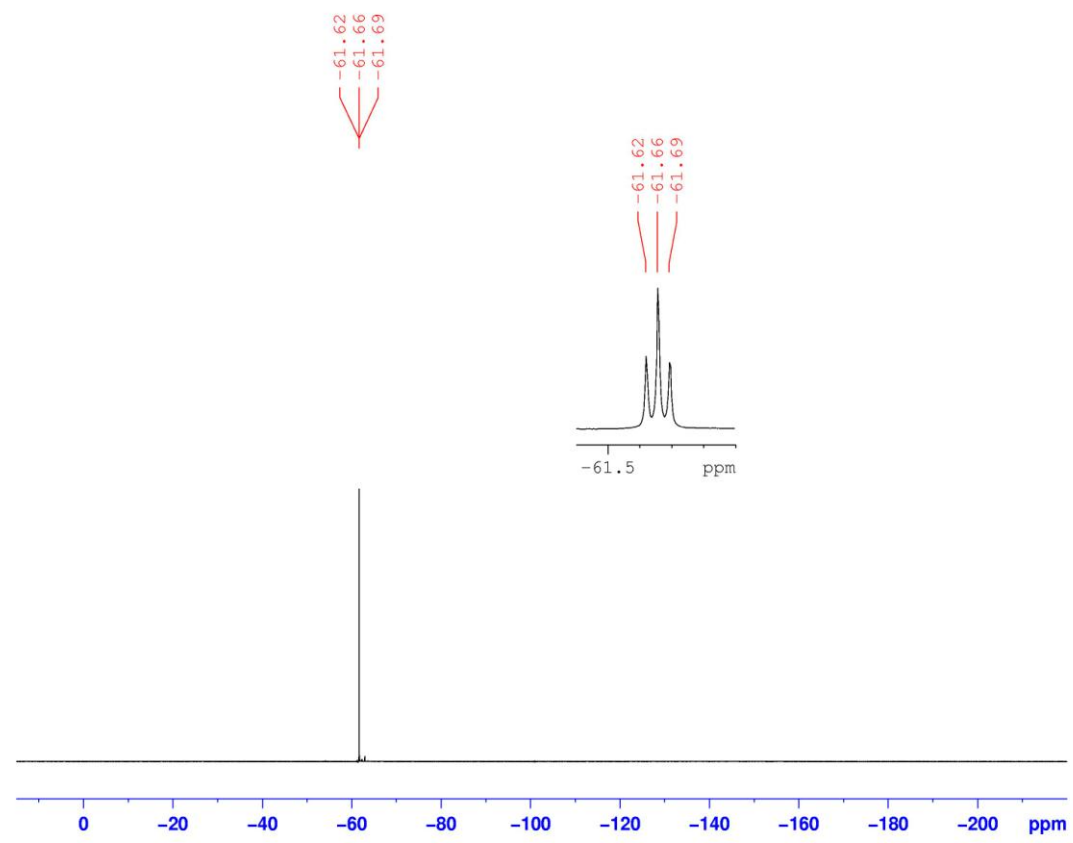

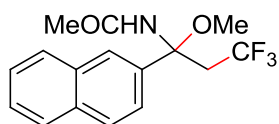

**4o**

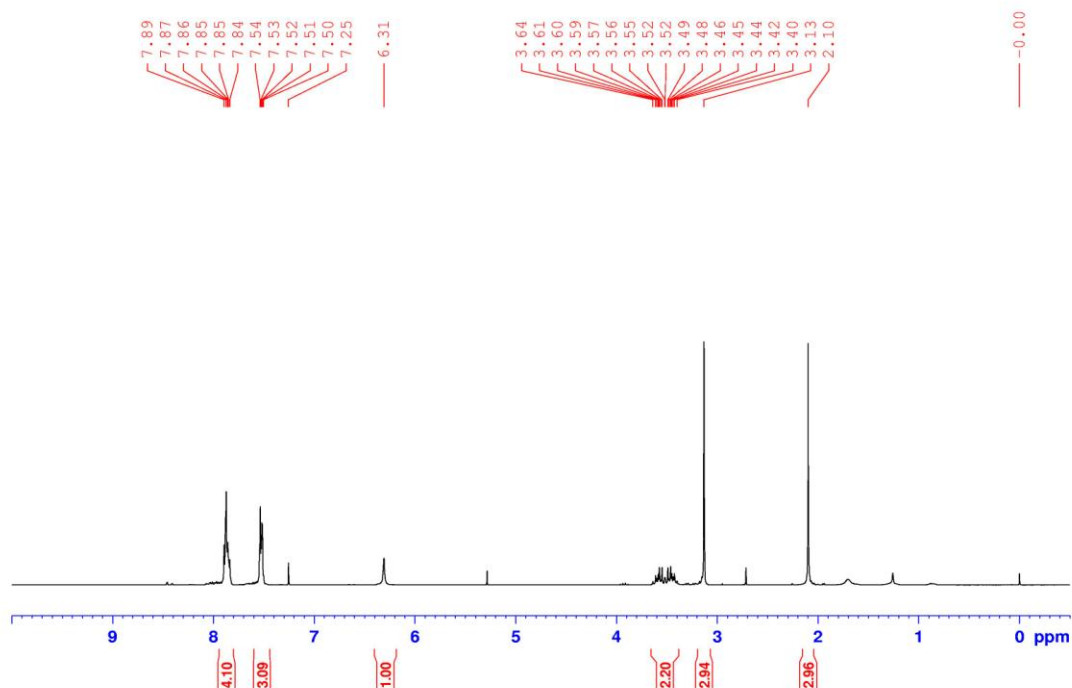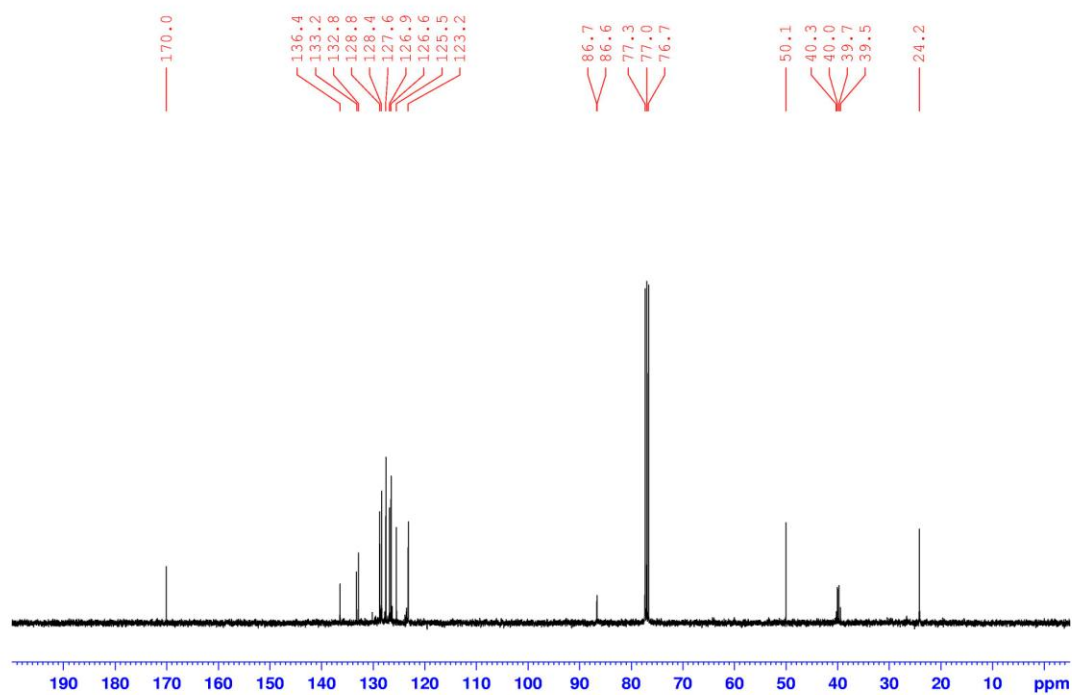

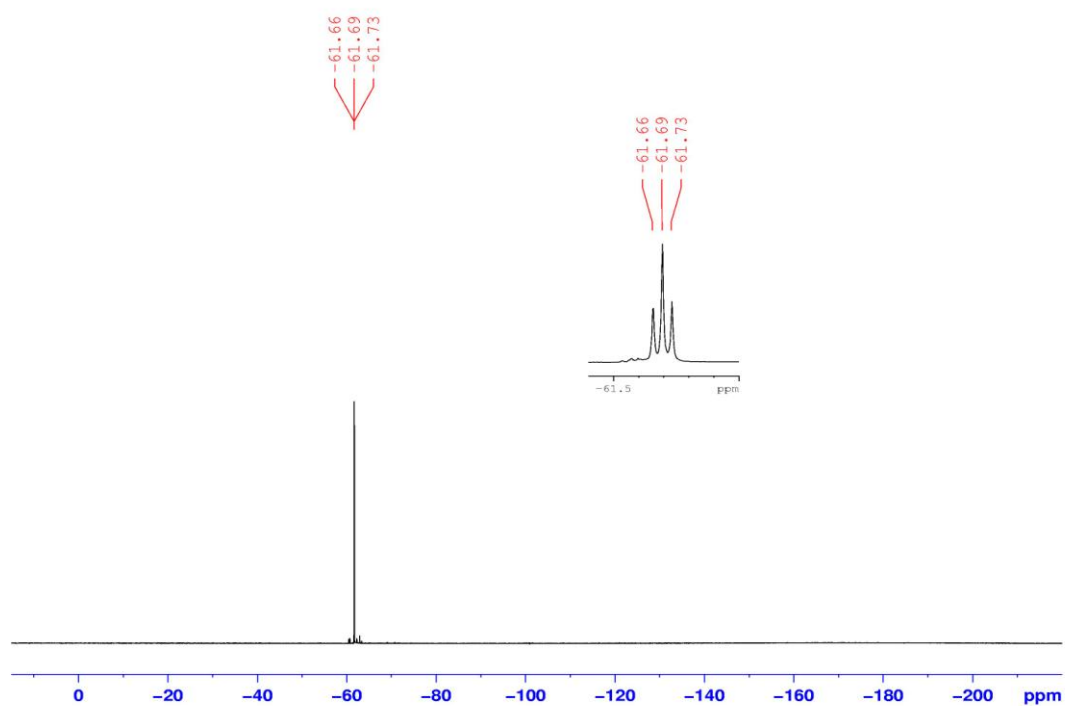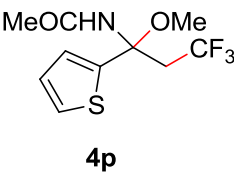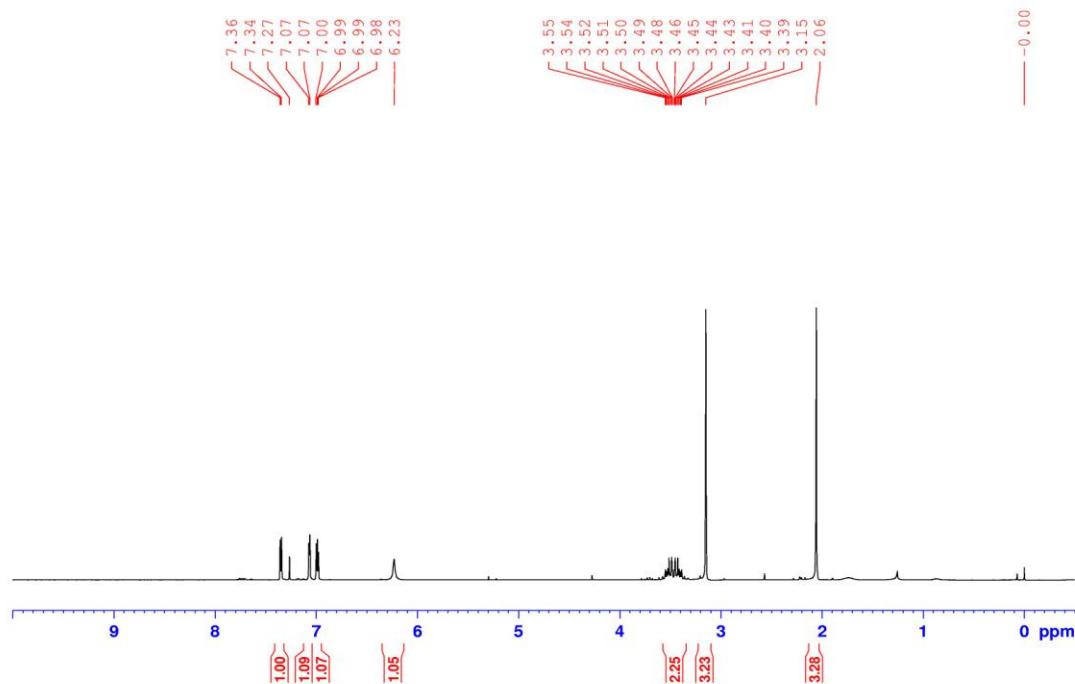

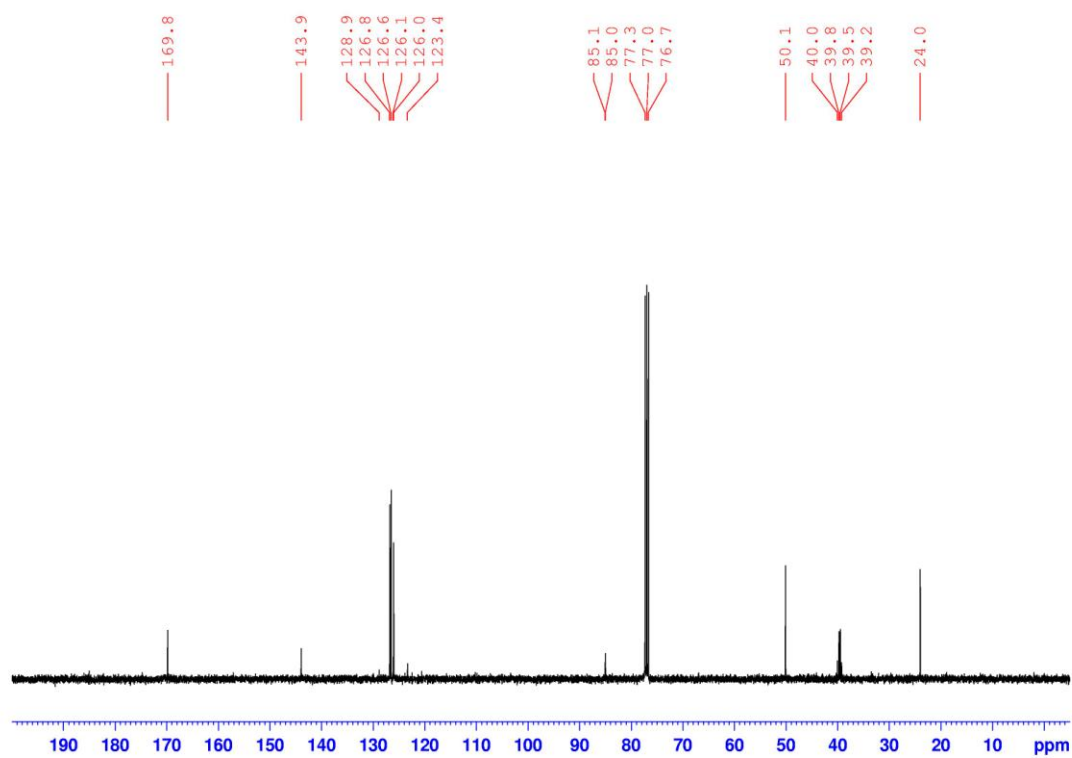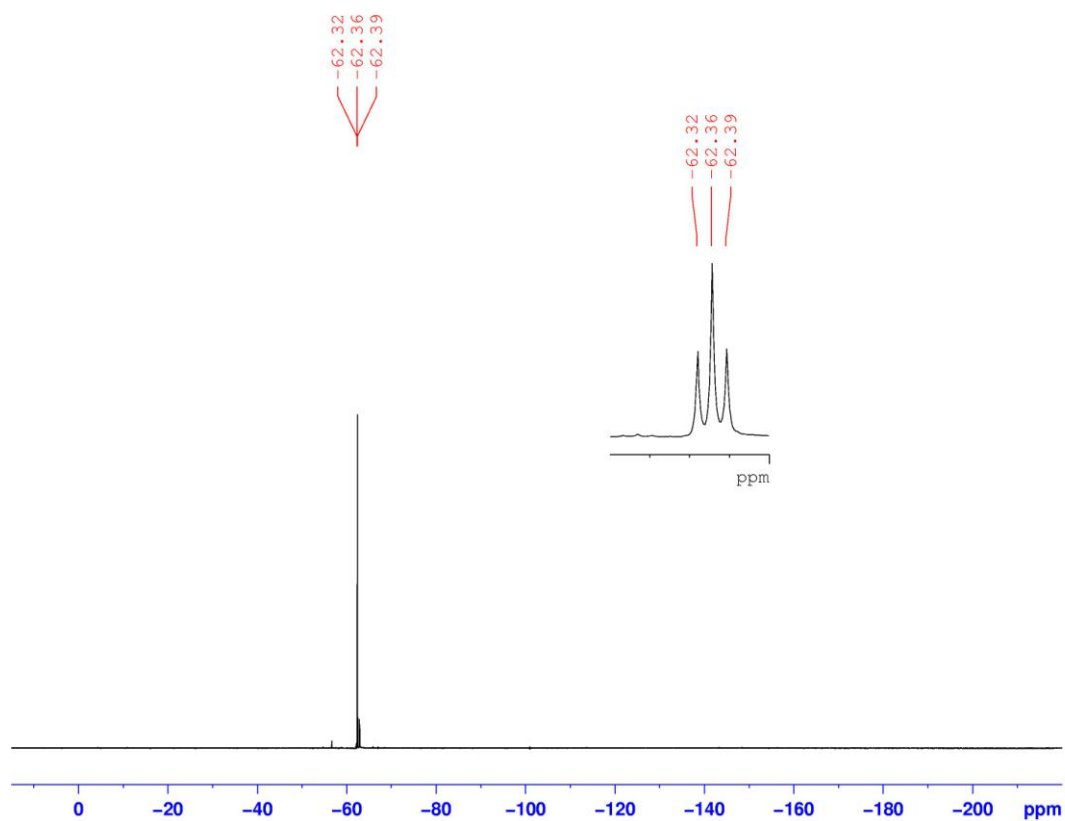

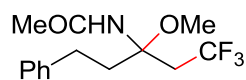

**4s**

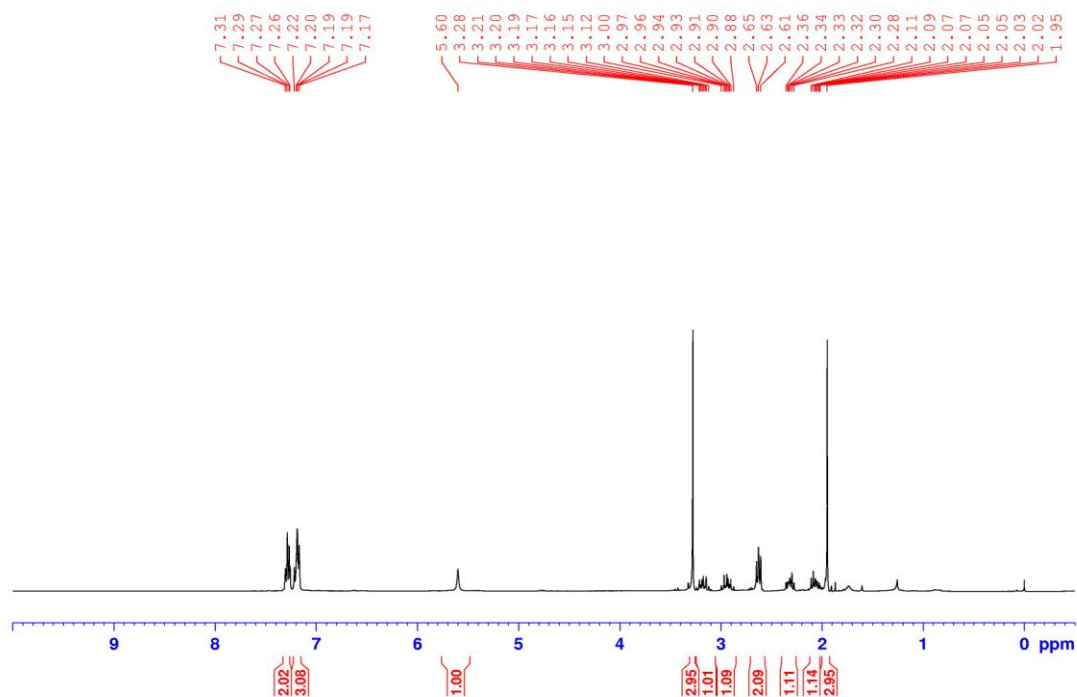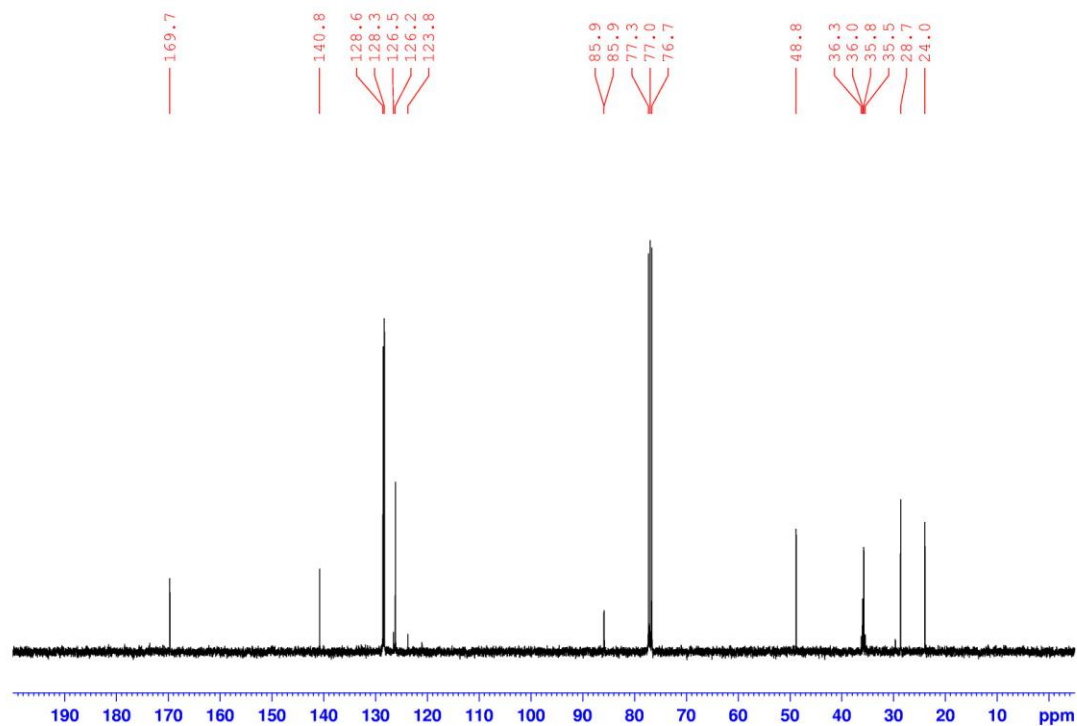

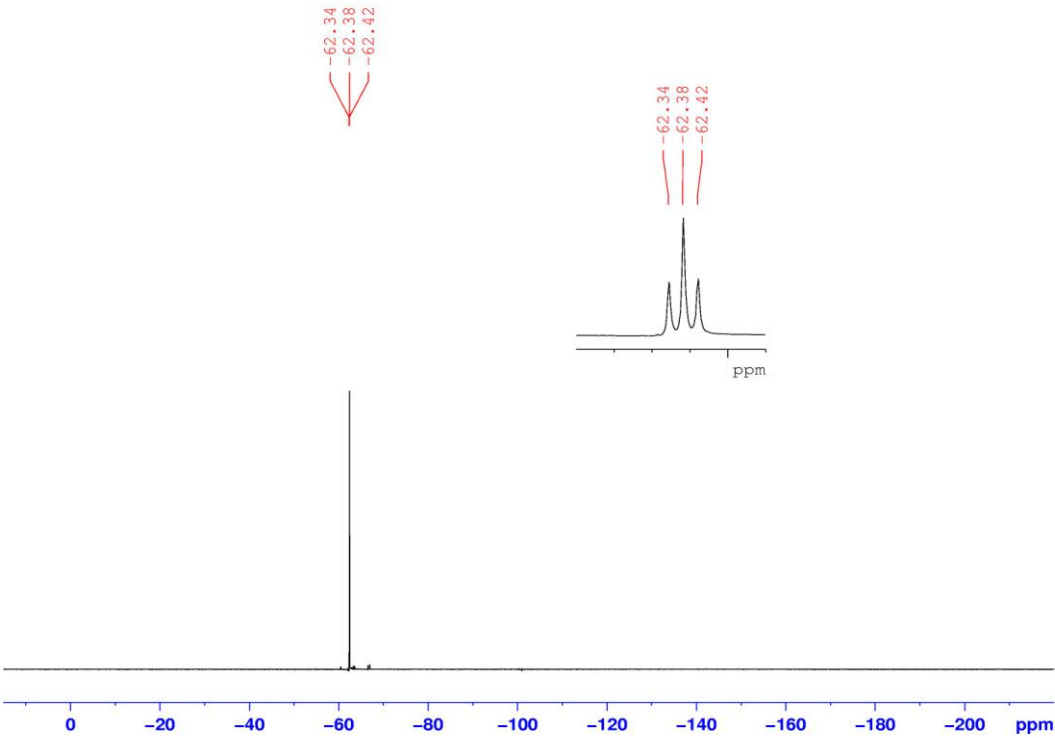

## X-ray data

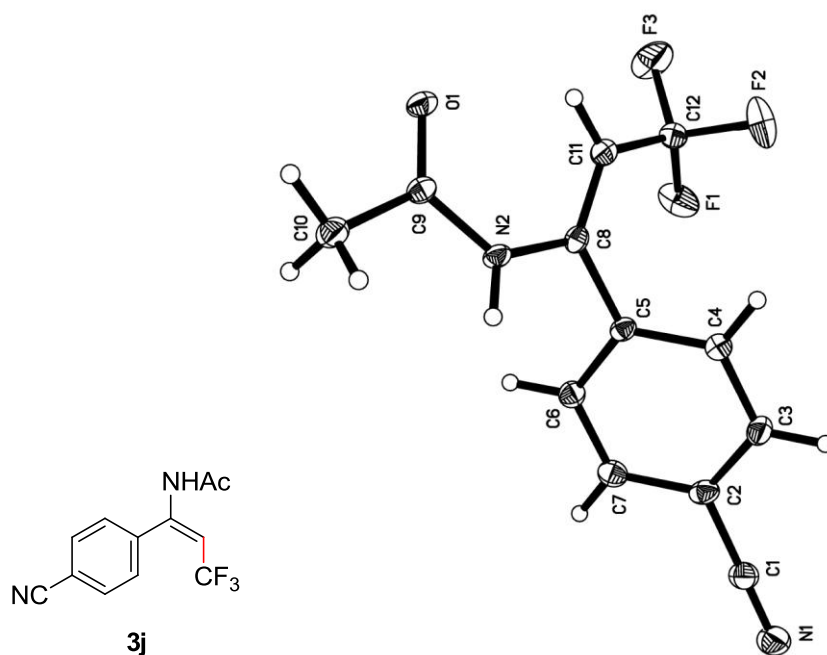

Table 1. Crystal data and structure refinement for ltp230s.

|                                 |                                                                                      |
|---------------------------------|--------------------------------------------------------------------------------------|
| Identification code             | ltp230s                                                                              |
| Empirical formula               | C <sub>12</sub> H <sub>9</sub> F <sub>3</sub> N <sub>2</sub> O                       |
| Formula weight                  | 254.21                                                                               |
| Temperature                     | 103(2) K                                                                             |
| Wavelength                      | 0.71073 Å                                                                            |
| Crystal system                  | Monoclinic                                                                           |
| Space group                     | P2(1)/n                                                                              |
| Unit cell dimensions            | $a = 6.2648(2) \text{ Å}$<br>$b = 8.9839(3) \text{ Å}$<br>$c = 20.5622(5) \text{ Å}$ |
|                                 | $\alpha = 90^\circ$<br>$\beta = 95.4600(10)^\circ$<br>$\gamma = 90^\circ$            |
| Volume                          | 1152.04(6) Å <sup>3</sup>                                                            |
| Z                               | 4                                                                                    |
| Density (calculated)            | 1.466 Mg/m <sup>3</sup>                                                              |
| Absorption coefficient          | 0.128 mm <sup>-1</sup>                                                               |
| F(000)                          | 520                                                                                  |
| Crystal size                    | 0.40 x 0.38 x 0.10 mm <sup>3</sup>                                                   |
| Theta range for data collection | 1.99 to 29.64°.                                                                      |
| Index ranges                    | -6 ≤ h ≤ 8, -12 ≤ k ≤ 12, -28 ≤ l ≤ 28                                               |
| Reflections collected           | 9979                                                                                 |
| Independent reflections         | 3206 [R(int) = 0.0299]                                                               |
| Completeness to theta = 29.64°  | 98.2 %                                                                               |



|                                   |                                             |
|-----------------------------------|---------------------------------------------|
| Absorption correction             | Semi-empirical from equivalents             |
| Max. and min. transmission        | 0.9873 and 0.9504                           |
| Refinement method                 | Full-matrix least-squares on F <sup>2</sup> |
| Data / restraints / parameters    | 3206 / 0 / 164                              |
| Goodness-of-fit on F <sup>2</sup> | 1.088                                       |
| Final R indices [I>2sigma(I)]     | R1 = 0.0454, wR2 = 0.1258                   |
| R indices (all data)              | R1 = 0.0588, wR2 = 0.1427                   |
| Largest diff. peak and hole       | 0.436 and -0.477 e.Å <sup>-3</sup>          |

Table 2. Atomic coordinates ( $\times 10^4$ ) and equivalent isotropic displacement parameters ( $\text{\AA}^2 \times 10^3$ ) for ltp230s.  $U(\text{eq})$  is defined as one third of the trace of the orthogonalized  $U^{ij}$  tensor.

|       | x        | y        | z       | U(eq) |
|-------|----------|----------|---------|-------|
| C(1)  | 2335(2)  | 3918(2)  | 5049(1) | 20(1) |
| C(2)  | 1971(2)  | 2700(2)  | 4591(1) | 17(1) |
| C(3)  | 3519(2)  | 2363(2)  | 4171(1) | 18(1) |
| C(4)  | 3119(2)  | 1225(2)  | 3719(1) | 16(1) |
| C(5)  | 1197(2)  | 445(2)   | 3682(1) | 13(1) |
| C(6)  | -345(2)  | 795(2)   | 4105(1) | 16(1) |
| C(7)  | 46(2)    | 1913(2)  | 4564(1) | 17(1) |
| C(8)  | 742(2)   | -714(2)  | 3167(1) | 13(1) |
| C(9)  | -2167(2) | -1271(2) | 2293(1) | 14(1) |
| C(10) | -4101(2) | -586(2)  | 1926(1) | 20(1) |
| C(11) | 1903(2)  | -1950(2) | 3114(1) | 16(1) |
| C(12) | 3654(2)  | -2471(2) | 3597(1) | 18(1) |
| F(1)  | 3469(2)  | -2072(1) | 4214(1) | 29(1) |
| F(2)  | 5610(2)  | -1995(2) | 3469(1) | 35(1) |
| F(3)  | 3757(2)  | -3957(1) | 3586(1) | 39(1) |
| N(1)  | 2606(2)  | 4890(2)  | 5404(1) | 27(1) |
| N(2)  | -1036(2) | -347(1)  | 2730(1) | 14(1) |
| O(1)  | -1653(2) | -2569(1) | 2212(1) | 17(1) |

Table 3. Bond lengths [Å] and angles [°] for ltp230s.

|                |            |
|----------------|------------|
| C(1)-N(1)      | 1.141(2)   |
| C(1)-C(2)      | 1.448(2)   |
| C(2)-C(3)      | 1.391(2)   |
| C(2)-C(7)      | 1.395(2)   |
| C(3)-C(4)      | 1.388(2)   |
| C(3)-H(3)      | 0.9500     |
| C(4)-C(5)      | 1.390(2)   |
| C(4)-H(4)      | 0.9500     |
| C(5)-C(6)      | 1.3962(19) |
| C(5)-C(8)      | 1.4927(18) |
| C(6)-C(7)      | 1.384(2)   |
| C(6)-H(6)      | 0.9500     |
| C(7)-H(7)      | 0.9500     |
| C(8)-C(11)     | 1.338(2)   |
| C(8)-N(2)      | 1.4020(17) |
| C(9)-O(1)      | 1.2255(18) |
| C(9)-N(2)      | 1.3699(18) |
| C(9)-C(10)     | 1.498(2)   |
| C(10)-H(10A)   | 0.9800     |
| C(10)-H(10B)   | 0.9800     |
| C(10)-H(10C)   | 0.9800     |
| C(11)-C(12)    | 1.483(2)   |
| C(11)-H(11)    | 0.9500     |
| C(12)-F(1)     | 1.3348(17) |
| C(12)-F(3)     | 1.3368(18) |
| C(12)-F(2)     | 1.3469(18) |
| N(2)-H(2)      | 0.8800     |
|                |            |
| N(1)-C(1)-C(2) | 179.10(18) |
| C(3)-C(2)-C(7) | 121.12(13) |
| C(3)-C(2)-C(1) | 119.49(14) |
| C(7)-C(2)-C(1) | 119.36(13) |
| C(4)-C(3)-C(2) | 118.92(14) |
| C(4)-C(3)-H(3) | 120.5      |
| C(2)-C(3)-H(3) | 120.5      |
| C(3)-C(4)-C(5) | 120.56(13) |

|                     |            |
|---------------------|------------|
| C(3)-C(4)-H(4)      | 119.7      |
| C(5)-C(4)-H(4)      | 119.7      |
| C(4)-C(5)-C(6)      | 119.94(13) |
| C(4)-C(5)-C(8)      | 119.80(12) |
| C(6)-C(5)-C(8)      | 120.18(12) |
| C(7)-C(6)-C(5)      | 120.06(13) |
| C(7)-C(6)-H(6)      | 120.0      |
| C(5)-C(6)-H(6)      | 120.0      |
| C(6)-C(7)-C(2)      | 119.38(13) |
| C(6)-C(7)-H(7)      | 120.3      |
| C(2)-C(7)-H(7)      | 120.3      |
| C(11)-C(8)-N(2)     | 123.20(13) |
| C(11)-C(8)-C(5)     | 124.64(12) |
| N(2)-C(8)-C(5)      | 112.14(12) |
| O(1)-C(9)-N(2)      | 122.68(13) |
| O(1)-C(9)-C(10)     | 122.17(13) |
| N(2)-C(9)-C(10)     | 115.15(13) |
| C(9)-C(10)-H(10A)   | 109.5      |
| C(9)-C(10)-H(10B)   | 109.5      |
| H(10A)-C(10)-H(10B) | 109.5      |
| C(9)-C(10)-H(10C)   | 109.5      |
| H(10A)-C(10)-H(10C) | 109.5      |
| H(10B)-C(10)-H(10C) | 109.5      |
| C(8)-C(11)-C(12)    | 125.46(13) |
| C(8)-C(11)-H(11)    | 117.3      |
| C(12)-C(11)-H(11)   | 117.3      |
| F(1)-C(12)-F(3)     | 106.95(13) |
| F(1)-C(12)-F(2)     | 105.23(12) |
| F(3)-C(12)-F(2)     | 105.50(13) |
| F(1)-C(12)-C(11)    | 115.27(12) |
| F(3)-C(12)-C(11)    | 109.77(12) |
| F(2)-C(12)-C(11)    | 113.46(12) |
| C(9)-N(2)-C(8)      | 127.41(13) |
| C(9)-N(2)-H(2)      | 116.3      |
| C(8)-N(2)-H(2)      | 116.3      |

---

Symmetry transformations used to generate equivalent atoms:

Table 4. Anisotropic displacement parameters ( $\text{\AA}^2 \times 10^3$ ) for ltp230s. The anisotropic displacement factor exponent takes the form:  $-2\pi^2 [h^2 a^{*2} U^{11} + \dots + 2 h k a^* b^* U^{12}]$

|       | $U^{11}$ | $U^{22}$ | $U^{33}$ | $U^{23}$ | $U^{13}$ | $U^{12}$ |
|-------|----------|----------|----------|----------|----------|----------|
| C(1)  | 19(1)    | 20(1)    | 21(1)    | -4(1)    | -4(1)    | 3(1)     |
| C(2)  | 20(1)    | 14(1)    | 16(1)    | -2(1)    | -4(1)    | 3(1)     |
| C(3)  | 15(1)    | 16(1)    | 23(1)    | -2(1)    | -3(1)    | -2(1)    |
| C(4)  | 15(1)    | 14(1)    | 18(1)    | -1(1)    | 2(1)     | 0(1)     |
| C(5)  | 15(1)    | 10(1)    | 13(1)    | 0(1)     | -1(1)    | 0(1)     |
| C(6)  | 16(1)    | 14(1)    | 17(1)    | 1(1)     | 2(1)     | -1(1)    |
| C(7)  | 19(1)    | 18(1)    | 15(1)    | 0(1)     | 3(1)     | 2(1)     |
| C(8)  | 13(1)    | 12(1)    | 13(1)    | 1(1)     | 1(1)     | -3(1)    |
| C(9)  | 17(1)    | 12(1)    | 14(1)    | 0(1)     | 2(1)     | -2(1)    |
| C(10) | 22(1)    | 16(1)    | 21(1)    | -3(1)    | -6(1)    | 3(1)     |
| C(11) | 16(1)    | 14(1)    | 19(1)    | -2(1)    | 0(1)     | 0(1)     |
| C(12) | 17(1)    | 15(1)    | 21(1)    | 0(1)     | 2(1)     | 2(1)     |
| F(1)  | 32(1)    | 37(1)    | 18(1)    | 2(1)     | 0(1)     | 14(1)    |
| F(2)  | 15(1)    | 54(1)    | 34(1)    | 13(1)    | 1(1)     | -1(1)    |
| F(3)  | 41(1)    | 15(1)    | 55(1)    | -2(1)    | -21(1)   | 8(1)     |
| N(1)  | 24(1)    | 26(1)    | 30(1)    | -10(1)   | -6(1)    | 5(1)     |
| N(2)  | 16(1)    | 8(1)     | 17(1)    | -1(1)    | -2(1)    | 1(1)     |
| O(1)  | 20(1)    | 11(1)    | 21(1)    | -3(1)    | 0(1)     | 0(1)     |

Table 5. Hydrogen coordinates ( $\times 10^4$ ) and isotropic displacement parameters ( $\text{\AA}^2 \times 10^{-3}$ ) for ltp230s.

|        | x     | y     | z    | U(eq) |
|--------|-------|-------|------|-------|
| H(3)   | 4829  | 2902  | 4194 | 22    |
| H(4)   | 4169  | 979   | 3432 | 19    |
| H(6)   | -1663 | 266   | 4078 | 19    |
| H(7)   | -987  | 2141  | 4859 | 21    |
| H(10A) | -4505 | -1166 | 1529 | 30    |
| H(10B) | -3771 | 438   | 1805 | 30    |
| H(10C) | -5292 | -582  | 2202 | 30    |
| H(11)  | 1581  | -2544 | 2735 | 19    |
| H(2)   | -1475 | 582   | 2737 | 17    |
